# Supplementary material for: YeeD is an essential partner for YeeE-mediated thiosulfate uptake in bacteria and regulates thiosulfate ion decomposition
Source: PLoS Biol. 2024 Apr 24;22(4):e3002601. doi: 10.1371/journal.pbio.3002601 (PMC11073785; doi:10.1371/journal.pbio.3002601)
Supplement: S1 Data — Raw data for Figs 1A–1C, 2C–2I, 4A, and 4B, S2B, S2C, S2G, and S4A–S4C. (XLSX) [file pbio.3002601.s007.xlsx]

## Sheet: Fig.1A
	Liposome (+YeeE) S2O32-					Liposome (+YeeE) SO42-				Note
	n1	n2	n3			n1	n2	n3		Mean values were calculated from three independet measurements.
time (s)	Amplitude (nA)	Amplitude (nA)	Amplitude (nA)		time (s)	Amplitude (nA)	Amplitude (nA)	Amplitude (nA)		Error bars represent standard deviations.
0.95	-0.0039793	0.00364774	0.0179836		0.95	-0.0006122	0.00030611	-0.0047956
0.951	0.00239779	-0.0078312	-0.0164531		0.951	-0.0018876	-0.0009693	0.0079587
0.952	0.0138767	-0.0052803	-0.0088005		0.952	0.0134176	0.00795871	-0.0009693
0.953	0.0164276	-0.0154838	-0.0049742		0.953	0.0032141	0.00540784	0.00158153
0.954	-0.0078056	-0.0052803	0.00395384		0.954	-0.0082648	0.00540784	0.0079587
0.955	0.017703	0.00109688	0.00395384		0.955	0.00193866	0.00795871	-0.0086219
0.956	-0.0052548	0.00237231	0.00522927		0.956	-0.0159174	-0.0022448	-0.0035202
0.957	-0.0014285	-0.0078312	-0.0011479		0.957	0.00831583	-0.0060711	0.0003061
0.958	-0.0129074	-0.0065557	-0.0075251		0.958	-0.0095402	-0.0047956	0.00540784
0.959	0.0138767	-0.0129329	-0.0011479		0.959	0.00959127	-0.0073465	0.011785
0.96	-0.0014285	-0.001454	0.00650471		0.96	-0.0120911	0.00030611	0.0041324
0.961	0.00112239	0.0138512	-0.0049742		0.961	-0.0082648	-0.0009693	-0.0137237
0.962	-0.0027039	0.0202284	-0.0036988		0.962	-0.0057139	0.00413241	-0.0035202
0.963	0.0138767	0.0113004	-0.0024233		0.963	-0.0044385	0.00668328	-0.0022448
0.964	0.00749959	-0.0027294	0.00905558		0.964	0.00066323	0.00668328	0.0130604
0.965	-0.0065302	0.0100249	-0.0062496		0.965	0.00193866	-0.0073465	-0.0060711
0.966	0.00239779	0.00492318	-0.0024233		0.966	-0.0108157	0.00285697	-0.0047956
0.967	0.00112239	0.0125758	-0.0011479		0.967	0.0121421	-0.0073465	-0.0009693
0.968	0.0100504	-0.0154838	0.00267841		0.968	-0.0044385	-0.0022448	-0.0086219
0.969	0.00877499	0.00237231	-0.0049742		0.969	-0.0133665	0.00540784	-0.0035202
0.97	0.00622409	-0.0052803	0.0128819		0.97	-0.0018876	-0.0060711	0.0041324
0.971	-0.0027039	0.00874948	0.0179836		0.971	0.0070404	-0.0073465	0.0079587
0.972	-0.000153	-0.001454	-0.0100759		0.972	0.00831583	-0.0022448	0.0143359
0.973	0.00749959	0.0113004	-0.0088005		0.973	-0.0057139	0.00795871	0.00540784
0.974	-0.0256617	0.0240547	-0.0011479		0.974	0.00448953	-0.0009693	-0.0149991
0.975	0.00367329	0.0100249	0.00395384		0.975	-0.0031631	-0.0086219	-0.0086219
0.976	0.00239779	-0.0040049	0.0116064		0.976	-0.0031631	0.00030611	0.0003061
0.977	0.00877499	-0.0040049	0.00140298		0.977	-0.0057139	-0.0035202	0.00540784
0.978	-0.0129074	-0.001454	0.0154327		0.978	-0.0069894	-0.0022448	-0.0022448
0.979	-0.0027039	-0.001454	0.00650471		0.979	-0.0006122	0.00030611	-0.0213763
0.98	0.0138767	0.00874948	-0.0062496		0.98	-0.0031631	-0.0098974	0.00540784
0.981	-0.0014285	-0.001454	0.00522927		0.981	0.0108667	-0.0124482	0.0041324
0.982	0.00877499	-0.0001786	-0.0088005		0.982	0.0032141	0.00668328	-0.0035202
0.983	0.0151522	-0.0129329	-0.0139022		0.983	0.00448953	0.00158154	-0.0162745
0.984	-0.0103565	-0.0091066	0.00522927		0.984	-0.0031631	0.00413241	0.00158153
0.985	-0.000153	-0.0052803	0.00140298		0.985	-0.0057139	-0.0124482	0.00923414
0.986	0.00112239	0.00747405	0.00522927		0.986	0.0121421	0.00540784	-0.0035202
0.987	-0.0192845	-0.0001786	-0.0062496		0.987	0.00959127	0.00158154	0.0105096
0.988	-0.0167337	-0.0142083	-0.0024233		0.988	0.00193866	-0.0086219	0.0105096
0.989	-0.0039793	-0.0193101	0.00522927		0.989	0.00066323	0.00668328	0.00923414
0.99	0.00622409	0.00237231	-0.0024233		0.99	-0.0031631	0.00795871	0.00285697
0.991	-0.0141828	0.00492318	-0.0088005		0.991	-0.0057139	-0.0009693	0.00285697
0.992	0.00622409	-0.0142083	-0.0151777		0.992	-0.0018876	-0.0022448	0.00668327
0.993	-0.0078056	0.00619861	0.00140298		0.993	0.0134176	-0.0047956	0.00668327
0.994	-0.0065302	-0.0001786	0.00012754		0.994	0.0159684	0.00923414	-0.0290289
0.995	-0.0014285	-0.0001786	0.00012754		0.995	-0.0159174	0.0105096	0.011785
0.996	-0.0103565	-0.0001786	0.00267841		0.996	0.0159684	-0.0035202	-0.0035202
0.997	-0.0039793	-0.0001786	-0.0011479		0.997	0.0032141	0.0156113	0.00668327
0.998	-0.0014285	0.00109688	-0.0011479		0.998	0.00576496	-0.0137237	-0.0047956
0.999	-0.0052548	0.00874948	0.00650471		0.999	-0.0069894	0.00795871	-0.0086219
1	-0.0154582	-0.0129329	-0.0062496		1	-0.0095402	0.00413241	-0.0035202
1.001	-0.0027039	0.00109688	0.00905558		1.001	0.00831583	0.0194376	-0.0035202
1.002	-0.0065302	-0.0040049	-0.0100759		1.002	0.0121421	0.00285697	0.00668327
1.003	-0.0269371	-0.0040049	-0.0126268		1.003	0.0210702	0.0105096	-0.0098974
1.004	-0.0014285	-0.0091066	-0.0024233		1.004	0.00066323	0.00030611	0.0105096
1.005	-0.0243863	-0.0027294	-0.0049742		1.005	-0.0082648	-0.0035202	-0.0047956
1.006	-0.0078056	-0.0205855	-0.0011479		1.006	0.0210702	0.00923414	0.0168867
1.007	-0.0014285	-0.0167592	-0.0088005		1.007	0.00066323	-0.0073465	-0.0035202
1.008	-0.0039793	-0.0116575	-0.0100759		1.008	0.0185193	0.011785	-0.01755
1.009	-0.0103565	-0.0040049	-0.0177285		1.009	0.00448953	-0.0035202	0.0168867
1.01	-0.0154582	-0.0142083	-0.0202794		1.01	0.00831583	0.00540784	0.00540784
1.011	-0.0167337	-0.0142083	-0.0177285		1.011	0.0121421	0.00285697	-0.0086219
1.012	-0.0307634	-0.0167592	0.00267841		1.012	-0.0031631	0.011785	-0.0086219
1.013	-0.02056	-0.0142083	-0.0241057		1.013	0.00448953	0.00285697	-0.0111728
1.014	0.00239779	-0.0142083	0.00267841		1.014	0.0223456	0.00540784	0.0105096
1.015	0.00494869	-0.0154838	-0.0202794		1.015	0.0070404	0.00923414	-0.0060711
1.016	-0.000153	-0.0167592	-0.0151777		1.016	0.0159684	-0.0022448	-0.0022448
1.017	-0.000153	-0.010382	0.00395384		1.017	0.00193866	0.00285697	0.0041324
1.018	-0.0052548	-0.0333398	-0.019004		1.018	-0.0057139	0.0105096	-0.0009693
1.019	0.0113259	-0.0256872	-0.0126268		1.019	0.0032141	0.00285697	0.011785
1.02	-0.0180091	-0.0256872	-0.0228303		1.02	-0.0006122	-0.0009693	0.00923414
1.021	-0.0027039	-0.0193101	-0.0100759		1.021	-0.0069894	0.00668328	-0.0111728
1.022	-0.000153	-0.0205855	-0.0151777		1.022	0.00448953	0.011785	-0.0009693
1.023	-0.000153	-0.0218609	-0.0100759		1.023	-0.0044385	0.00923414	0.00285697
1.024	-0.0027039	-0.0256872	-0.0100759		1.024	-0.0095402	-0.0098974	0.00285697
1.025	-0.0014285	-0.0167592	-0.0151777		1.025	-0.0031631	-0.0022448	0.00540784
1.026	0.00494869	-0.0142083	0.00012754		1.026	-0.0057139	0.00540784	0.0041324
1.027	0.00239779	-0.0167592	-0.0036988		1.027	-0.0044385	0.00795871	0.0079587
1.028	0.00622409	-0.0269627	0.00650471		1.028	0.0121421	0.00158154	-0.0035202
1.029	-0.0141828	-0.0244118	-0.0177285		1.029	0.00448953	0.00030611	0.0003061
1.03	0.0113259	-0.0040049	-0.0036988		1.03	-0.0095402	-0.0009693	0.00923414
1.031	-0.0027039	-0.0052803	0.010331		1.031	-0.0057139	0.00668328	0.0003061
1.032	0.00622409	0.00109688	0.00012754		1.032	0.00193866	-0.0047956	-0.0009693
1.033	-0.0039793	0.00874948	0.00650471		1.033	-0.0006122	0.0105096	0.00668327
1.034	-0.0014285	-0.0027294	0.00522927		1.034	0.0032141	-0.0111728	0.0041324
1.035	-0.0141828	-0.0052803	0.00012754		1.035	0.0070404	0.00795871	0.00540784
1.036	-0.0052548	-0.0052803	-0.0049742		1.036	0.0108667	0.00668328	0.0041324
1.037	0.0113259	0.00747405	0.00905558		1.037	0.0172439	0.0105096	0.00285697
1.038	-0.0014285	0.0202284	0.00905558		1.038	0.00576496	0.011785	0.0079587
1.039	-0.0154582	0.0253301	0.0167082		1.039	-0.0082648	0.0130604	0.0232639
1.04	-0.0243863	0.0240547	0.00267841		1.04	-0.0031631	0.0143359	-0.0022448
1.041	0.00877499	0.0100249	0.00267841		1.041	0.00193866	-0.0047956	0.00668327
1.042	0.0113259	0.0138512	0.0141573		1.042	-0.0057139	-0.0035202	0.0079587
1.043	0.00239779	0.00619861	0.00778014		1.043	-0.0057139	0.00668328	-0.0035202
1.044	0.00367329	0.00492318	0.010331		1.044	0.014693	0.00285697	-0.0098974
1.045	0.00622409	0.0125758	-0.0075251		1.045	0.00448953	-0.0009693	-0.0035202
1.046	0.017703	0.0138512	-0.0011479		1.046	0.0223456	-0.0009693	0.0181622
1.047	-0.0027039	0.0138512	-0.0011479		1.047	0.0172439	0.00030611	0.00923414
1.048	0.00112239	0.00747405	0.00905558		1.048	0.0159684	0.011785	-0.0009693
1.049	-0.0129074	0.0125758	0.0116064		1.049	0.00959127	0.0105096	-0.0035202
1.05	-0.0103565	0.0100249	-0.0011479		1.05	-0.0006122	0.00795871	-0.0035202
1.051	0.0164276	0.0253301	0.0116064		1.051	0.0121421	-0.0047956	0.0105096
1.052	-0.0014285	0.0240547	0.00140298		1.052	0.0121421	0.00923414	0.00285697
1.053	0.00749959	0.0100249	0.00905558		1.053	0.0172439	-0.0047956	-0.0009693
1.054	-0.0039793	0.0215038	0.00905558		1.054	-0.0031631	0.011785	0.0143359
1.055	-0.0039793	0.00109688	0.00778014		1.055	0.0248965	0.00795871	-0.0060711
1.056	-0.0078056	0.00874948	-0.0011479		1.056	0.00193866	-0.0060711	0.00158153
1.057	-0.0116319	0.0138512	0.00012754		1.057	0.0274473	0.0258148	0.00285697
1.058	0.00622409	0.0113004	0.00140298		1.058	0.0134176	-0.0149991	0.0168867
1.059	0.00239779	0.00364774	-0.0049742		1.059	0.0070404	0.00668328	0.0181622
1.06	-0.0039793	0.0113004	-0.0100759		1.06	0.0108667	0.0181622	0.00668327
1.061	-0.0078056	0.00874948	0.010331		1.061	0.0172439	0.00030611	0.0105096
1.062	-0.0014285	0.0138512	0.00905558		1.062	0.0121421	0.00668328	0.0041324
1.063	0.00877499	0.0113004	-0.0036988		1.063	0.00066323	-0.0073465	0.0105096
1.064	0.00112239	-0.0052803	0.00012754		1.064	0.00448953	0.0168867	0.00540784
1.065	-0.0052548	0.00109688	-0.0024233		1.065	-0.0018876	0.00795871	0.0181622
1.066	-0.0052548	-0.0052803	0.00905558		1.066	0.014693	0.011785	0.0105096
1.067	0.00239779	0.00874948	0.00522927		1.067	0.0108667	0.00668328	0.00158153
1.068	-0.0129074	0.00109688	-0.0011479		1.068	0.0134176	0.00285697	0.0219885
1.069	-0.0027039	-0.0091066	0.00267841		1.069	0.00831583	0.00795871	0.0168867
1.07	-0.0141828	-0.001454	-0.0126268		1.07	0.0108667	0.00158154	0.0143359
1.071	-0.0218354	0.00492318	-0.0151777		1.071	0.0299982	0.0156113	0.0156113
1.072	-0.0065302	-0.0129329	0.00140298		1.072	-0.0031631	0.00795871	0.0143359
1.073	-0.0078056	0.0100249	0.0128819		1.073	-0.0006122	0.00540784	0.0130604
1.074	-0.0180091	0.00492318	0.00522927		1.074	0.00959127	0.00413241	0.00285697
1.075	-0.0180091	0.0100249	0.0128819		1.075	-0.0031631	0.00540784	0.0194376
1.076	-0.0154582	0.0164021	-0.0139022		1.076	0.014693	-0.0047956	0.0079587
1.077	-0.0052548	0.00874948	-0.0151777		1.077	0.00831583	0.00285697	0.00158153
1.078	-0.0154582	-0.0078312	-0.0100759		1.078	0.0274473	0.0130604	0.00668327
1.079	-0.0243863	-0.0193101	-0.0075251		1.079	0.00576496	0.011785	0.00285697
1.08	-0.0269371	-0.0052803	-0.0088005		1.08	-0.0069894	-0.0098974	0.00540784
1.081	-0.02056	0.00747405	-0.0011479		1.081	-0.0031631	-0.0035202	0.0156113
1.082	-0.0103565	-0.001454	-0.0088005		1.082	0.00066323	0.0245394	0.0168867
1.083	-0.0320389	0.00237231	-0.0126268		1.083	0.00576496	0.0105096	0.00668327
1.084	-0.0269371	0.00874948	-0.0139022		1.084	0.0121421	0.00923414	-0.0035202
1.085	-0.0320389	-0.0078312	-0.0113514		1.085	0.00831583	-0.0098974	0.0143359
1.086	-0.0320389	-0.0027294	-0.0024233		1.086	0.0108667	-0.0111728	0.0003061
1.087	-0.0039793	-0.0065557	-0.0151777		1.087	0.00193866	-0.0111728	-0.0111728
1.088	-0.0231108	0.00874948	-0.0100759		1.088	-0.0006122	-0.0009693	0.011785
1.089	-0.0231108	-0.0078312	-0.0075251		1.089	0.00193866	0.00923414	-0.0047956
1.09	-0.0333143	-0.0154838	-0.0011479		1.09	-0.0057139	0.00795871	0.00158153
1.091	-0.0396915	-0.0218609	-0.0177285		1.091	0.00193866	0.00285697	0.0143359
1.092	-0.0371406	-0.0065557	-0.0266566		1.092	0.0070404	0.00285697	-0.0035202
1.093	-0.0345897	-0.010382	-0.0126268		1.093	-0.0006122	0.00158154	0.0130604
1.094	-0.0422423	-0.0167592	-0.0177285		1.094	-0.0133665	0.00285697	0.00158153
1.095	-0.029488	-0.0027294	-0.0394109		1.095	-0.0120911	0.0296411	0.0105096
1.096	-0.0435178	-0.0231364	-0.0929791		1.096	-0.0159174	0.011785	0.00540784
1.097	-0.0460687	-0.0244118	-0.175882		1.097	-0.0069894	0.0207131	0.0079587
1.098	-0.0690265	-0.0358907	-0.276642		1.098	-0.0159174	0.0385691	0.0079587
1.099	-0.0932597	-0.0575731	-0.364646		1.099	-0.0082648	0.0436708	0.0347428
1.1	-0.18254	-0.13665	-0.441173		1.1	-0.0337735	0.0474972	0.0258148
1.101	-0.289677	-0.233583	-0.493465		1.101	-0.0324981	0.0525989	0.0423954
1.102	-0.421046	-0.334342	-0.524076		1.102	-0.0159174	0.0666287	0.0423954
1.103	-0.496297	-0.408317	-0.545758		1.103	-0.02357	0.0640778	0.0589761
1.104	-0.562619	-0.465712	-0.545758		1.104	-0.0222946	0.0742813	0.0679041
1.105	-0.618738	-0.495047	-0.547033		1.105	-0.0286717	0.0768321	0.0985145
1.106	-0.659552	-0.524382	-0.53683		1.106	-0.02357	0.0908619	0.102341
1.107	-0.677408	-0.535861	-0.512597		1.107	-0.0184683	0.108718	0.0883111
1.108	-0.679959	-0.518005	-0.481986		1.108	-0.0210191	0.108718	0.11382
1.109	-0.674857	-0.507801	-0.451376		1.109	-0.0159174	0.103616	0.121472
1.11	-0.664654	-0.501424	-0.418215		1.11	-0.0324981	0.104892	0.121472
1.111	-0.640421	-0.456784	-0.383778		1.111	-0.0414261	0.107443	0.121472
1.112	-0.603433	-0.426173	-0.34679		1.112	-0.0248454	0.118921	0.116371
1.113	-0.588128	-0.393012	-0.295773		1.113	-0.0248454	0.117646	0.121472
1.114	-0.548589	-0.331791	-0.270264		1.114	-0.0159174	0.116371	0.14443
1.115	-0.507776	-0.306283	-0.224349		1.115	-0.0299472	0.108718	0.125299
1.116	-0.468237	-0.271846	-0.202666		1.116	-0.0261209	0.104892	0.138053
1.117	-0.426148	-0.218278	-0.146547		1.117	-0.0197437	0.107443	0.131676
1.118	-0.385334	-0.185116	-0.101907		1.118	0.0121421	0.121472	0.126574
1.119	-0.322838	-0.135375	-0.0917037		1.119	-0.0044385	0.116371	0.131676
1.12	-0.311359	-0.0881835	-0.0610933		1.12	-0.0018876	0.117646	0.136777
1.121	-0.259066	-0.0575731	-0.0394109		1.121	-0.0006122	0.115095	0.1304
1.122	-0.233557	-0.0384416	-0.0036988		1.122	0.00066323	0.11382	0.138053
1.123	-0.181265	0.0100249	0.0281871		1.123	0.00193866	0.122748	0.138053
1.124	-0.158307	0.0266055	0.0345642		1.124	0.00193866	0.117646	0.148256
1.125	-0.136624	0.075072	0.0511449		1.125	-0.0057139	0.125299	0.148256
1.126	-0.106014	0.0903772	0.0677255		1.126	0.00831583	0.118921	0.139328
1.127	-0.0817808	0.101856	0.0855816		1.127	0.00959127	0.118921	0.138053
1.128	-0.0524458	0.117161	0.105989		1.128	0.014693	0.129125	0.139328
1.129	-0.0320389	0.120988	0.121294		1.129	0.0261719	0.117646	0.14443
1.13	-0.0141828	0.14267	0.13915		1.13	0.0261719	0.121472	0.129125
1.131	0.0189785	0.163077	0.127671		1.131	0.0248965	0.108718	0.118921
1.132	0.0279065	0.1567	0.162108		1.132	0.0325491	0.108718	0.138053
1.133	0.0457626	0.184759	0.158281		1.133	0.0350999	0.117646	0.121472
1.134	0.0750975	0.202615	0.177413		1.134	0.0248965	0.116371	0.139328
1.135	0.0597923	0.202615	0.164659		1.135	0.0363754	0.121472	0.129125
1.136	0.076373	0.21537	0.199095		1.136	0.0223456	0.0972391	0.121472
1.137	0.0955045	0.220472	0.19782		1.137	0.0516806	0.112544	0.143155
1.138	0.104432	0.223022	0.196544		1.138	0.0376508	0.111269	0.131676
1.139	0.115911	0.243429	0.215676		1.139	0.0350999	0.111269	0.1304
1.14	0.138869	0.254908	0.227155		1.14	0.0580577	0.111269	0.116371
1.141	0.151624	0.238328	0.223328		1.141	0.0580577	0.120197	0.132951
1.142	0.160552	0.26001	0.224604		1.142	0.052956	0.117646	0.136777
1.143	0.17203	0.280417	0.239909		1.143	0.0542314	0.117646	0.132951
1.144	0.166929	0.263836	0.236083		1.144	0.0733629	0.121472	0.125299
1.145	0.165653	0.277866	0.224604		1.145	0.0784647	0.12785	0.116371
1.146	0.180958	0.282968	0.241185		1.146	0.082291	0.111269	0.129125
1.147	0.151624	0.280417	0.239909		1.147	0.0631595	0.11382	0.11382
1.148	0.188611	0.288069	0.232257		1.148	0.0708121	0.118921	0.107443
1.149	0.201365	0.288069	0.247562		1.149	0.0708121	0.118921	0.11382
1.15	0.180958	0.268938	0.239909		1.15	0.0988716	0.12785	0.136777
1.151	0.207743	0.27404	0.219502		1.151	0.0975962	0.121472	0.11382
1.152	0.180958	0.277866	0.232257		1.152	0.0975962	0.135502	0.120197
1.153	0.20009	0.268938	0.251388		1.153	0.102698	0.139328	0.131676
1.154	0.20009	0.263836	0.243735		1.154	0.0924944	0.129125	0.121472
1.155	0.189887	0.254908	0.219502		1.155	0.0988716	0.126574	0.122748
1.156	0.189887	0.272764	0.223328		1.156	0.119279	0.12785	0.129125
1.157	0.187336	0.26001	0.227155		1.157	0.110351	0.139328	0.126574
1.158	0.182234	0.254908	0.22843		1.158	0.1078	0.14443	0.132951
1.159	0.161827	0.261285	0.225879		1.159	0.119279	0.140604	0.129125
1.16	0.17203	0.267663	0.220778		1.16	0.135859	0.132951	0.129125
1.161	0.194988	0.230675	0.205472		1.161	0.123105	0.139328	0.134227
1.162	0.180958	0.243429	0.2144		1.162	0.130757	0.161011	0.117646
1.163	0.179683	0.248531	0.215676		1.163	0.133308	0.155909	0.135502
1.164	0.166929	0.253633	0.219502		1.164	0.126931	0.150807	0.124023
1.165	0.159276	0.234501	0.202922		1.165	0.123105	0.157184	0.14443
1.166	0.161827	0.26001	0.208023		1.166	0.144787	0.135502	0.129125
1.167	0.164378	0.226849	0.2144		1.167	0.137135	0.166113	0.121472
1.168	0.168204	0.226849	0.210574		1.168	0.139686	0.153358	0.146981
1.169	0.165653	0.234501	0.219502		1.169	0.13841	0.140604	0.132951
1.17	0.166929	0.240878	0.192718		1.17	0.140961	0.149532	0.149532
1.171	0.136318	0.228124	0.202922		1.171	0.148614	0.155909	0.140604
1.172	0.152899	0.242154	0.219502		1.172	0.134584	0.148256	0.143155
1.173	0.147797	0.244705	0.210574		1.173	0.137135	0.143155	0.124023
1.174	0.147797	0.235777	0.2144		1.174	0.137135	0.148256	0.124023
1.175	0.151624	0.219196	0.219502		1.175	0.130757	0.148256	0.139328
1.176	0.147797	0.228124	0.209299		1.176	0.140961	0.146981	0.135502
1.177	0.146522	0.23195	0.215676		1.177	0.126931	0.153358	0.141879
1.178	0.145246	0.243429	0.222053		1.178	0.111626	0.152083	0.117646
1.179	0.156725	0.243429	0.209299		1.179	0.133308	0.145706	0.116371
1.18	0.160552	0.243429	0.234807		1.18	0.129482	0.146981	0.132951
1.181	0.16948	0.248531	0.252663		1.181	0.12438	0.15846	0.121472
1.182	0.173306	0.268938	0.260316		1.182	0.121829	0.139328	0.115095
1.183	0.165653	0.268938	0.250113		1.183	0.103973	0.122748	0.1304
1.184	0.163102	0.265112	0.278172		1.184	0.137135	0.134227	0.126574
1.185	0.164378	0.271489	0.316435		1.185	0.12438	0.145706	0.134227
1.186	0.17203	0.293171	0.306232		1.186	0.0963207	0.131676	0.141879
1.187	0.170755	0.305926	0.326639		1.187	0.102698	0.122748	0.115095
1.188	0.183509	0.312303	0.336842		1.188	0.0924944	0.129125	0.120197
1.189	0.212844	0.314854	0.343219		1.189	0.0988716	0.136778	0.117646
1.19	0.203916	0.335261	0.380207		1.19	0.0975962	0.134227	0.117646
1.191	0.231976	0.354392	0.43505		1.191	0.0988716	0.12785	0.134227
1.192	0.238353	0.385002	0.44908		1.192	0.110351	0.125299	0.116371
1.193	0.266413	0.409236	0.480966		1.193	0.0835664	0.112544	0.09979
1.194	0.282993	0.444948	0.52178		1.194	0.112901	0.122748	0.112544
1.195	0.326358	0.471732	0.572797		1.195	0.105249	0.1304	0.106167
1.196	0.336561	0.49469	0.619988		1.196	0.102698	0.12785	0.111269
1.197	0.386303	0.545707	0.658251		1.197	0.0975962	0.131676	0.112544
1.198	0.43477	0.581419	0.718197		1.198	0.0835664	0.118921	0.104892
1.199	0.487063	0.62861	0.759011		1.199	0.102698	0.116371	0.121472
1.2	0.521499	0.682178	0.775591		1.2	0.101423	0.121472	0.124023

## Sheet: Fig.1B
	Liposome (+YeeE)					Liposome (-YeeE)				Note
	n1	n2	n3			n1	n2	n3		Mean values were calculated from three independet measurements.
time (s)	Amplitude (nA)	Amplitude (nA)	Amplitude (nA)		time (s)	Amplitude (nA)	Amplitude (nA)	Amplitude (nA)		Error bars represent standard deviations.
0.95	0.00487216	-0.0222691	-0.0010203		0.95	0.0108667	-0.0007142	0.00846888
0.951	0.00869846	-0.013341	-0.0073975		0.951	0.00066323	-0.0007142	0.00081628
0.952	-0.0053313	-0.013341	-0.0022958		0.952	-0.0018876	0.00438749	-0.00301
0.953	0.0189019	-0.0120656	0.00025509		0.953	-0.0069894	-0.0032651	-0.0055609
0.954	0.0201774	-0.0107902	-0.0048466		0.954	0.00831583	-0.0045405	-0.00301
0.955	0.0099739	-0.0120656	-0.0086729		0.955	-0.0069894	-0.0045405	0.00591802
0.956	0.00869846	-0.0069639	0.0104586		0.956	0.00321409	-0.0007142	0.00719345
0.957	0.0099739	-0.0107902	0.00025509		0.957	-0.0031631	0.00056119	0.00336715
0.958	0.02783	-0.0056884	-0.0061221		0.958	-0.0120911	0.00693836	0.00591802
0.959	0.00614759	-0.0082393	-0.0035712		0.959	0.00321409	-0.005816	0.00336715
0.96	-0.0091576	-0.0082393	0.00153052		0.96	-0.0057139	0.00438749	-0.0042855
0.961	-0.001505	-0.0120656	-0.0010203		0.961	0.00704039	-0.0045405	-0.00301
0.962	0.00614759	0.00068873	-0.0022958		0.962	0.00704039	-0.0083668	0.00336715
0.963	-0.001505	-0.0031376	0.011734		0.963	-0.0108157	0.0107647	0.00209171
0.964	-0.021912	0.00579047	-0.0061221		0.964	-0.0108157	0.00438749	-0.0055609
0.965	0.0163511	-0.0005867	0.00408139		0.965	0.00704039	-0.0045405	0.00081628
0.966	0.00232129	-0.0056884	-0.0086729		0.966	0.00448953	-0.005816	0.0161215
0.967	-0.0091576	-0.0031376	0.00408139		0.967	0.00576496	-0.0070914	-0.00301
0.968	0.0138002	0.00068873	-0.0022958		0.968	-0.0171928	-0.0019897	-0.0055609
0.969	0.00614759	-0.0069639	0.00408139		0.969	0.00831583	0.0133155	-0.0183152
0.97	0.00487216	0.00068873	0.00535683		0.97	-0.0082648	-0.0083668	0.00081628
0.971	0.00614759	0.00196417	0.00535683		0.971	0.00831583	0.00311205	-0.0042855
0.972	-0.0180856	0.00834134	0.00663226		0.972	0.0121421	0.00693836	0.00846888
0.973	0.00614759	-0.0056884	0.00153052		0.973	-0.0095402	-0.0032651	0.00719345
0.974	0.00614759	-0.0005867	0.011734		0.974	0.00193866	0.00566292	0.00336715
0.975	-0.001505	0.0198202	0.00790769		0.975	0.0121421	-0.0109177	-0.0004592
0.976	-0.0002296	0.0172694	-0.0048466		0.976	0.00576496	0.0120401	0.00846888
0.977	-0.001505	-0.004413	0.00918313		0.977	-0.0018876	-0.0045405	0.00336715
0.978	-0.001505	0.00196417	0.0130094		0.978	-0.0018876	0.00311205	-0.0093872
0.979	-0.0040559	-0.0082393	-0.0010203		0.979	-0.0044385	0.00183662	-0.0093872
0.98	0.00869846	0.0159939	-0.0099484		0.98	-0.0044385	-0.0019897	0.00209171
0.981	-0.0053313	0.00834134	-0.0035712		0.981	-0.0018876	0.0107647	-0.00301
0.982	0.0163511	0.0121676	-0.0099484		0.982	0.00576496	0.00056119	0.0161215
0.983	-0.0117085	-0.004413	-0.0048466		0.983	0.00321409	0.0133155	0.00081628
0.984	0.0125248	0.0070659	-0.0010203		0.984	0.00831583	0.00438749	-0.0004592
0.985	-0.0053313	0.0185448	0.00153052		0.985	0.00576496	-0.0121931	-0.0004592
0.986	0.00104586	0.0159939	-0.0022958		0.986	-0.014642	-0.0070914	-0.0132135
0.987	-0.0002296	0.0287483	-0.0150501		0.987	0.00831583	0.00693836	0.00081628
0.988	0.0112493	-0.0005867	0.00790769		0.988	-0.0069894	-0.0007142	-0.00301
0.989	-0.0078822	-0.0095147	0.011734		0.989	-0.0108157	-0.0045405	-0.0055609
0.99	-0.001505	0.0070659	0.0193866		0.99	-0.0057139	-0.0019897	0.00081628
0.991	-0.0066067	-0.0107902	-0.0022958		0.991	0.0108667	0.00056119	0.00081628
0.992	-0.0078822	0.00834134	0.0104586		0.992	0.00448953	-0.005816	-0.0093872
0.993	-0.0244628	0.00834134	-0.0086729		0.993	0.00193866	0.00948922	0.00719345
0.994	-0.0206365	0.00961677	-0.0048466		0.994	-0.0120911	0.00438749	-0.0055609
0.995	-0.0142593	0.0121676	-0.0099484		0.995	0.00704039	0.00056119	-0.0119381
0.996	-0.0053313	-0.004413	-0.0022958		0.996	0.00066323	-0.0045405	-0.0093872
0.997	-0.0180856	-0.0031376	0.00025509		0.997	-0.0082648	-0.0019897	0.0135706
0.998	-0.0244628	-0.0005867	0.00663226		0.998	0.0121421	-0.0007142	0.00336715
0.999	-0.0040559	-0.0018621	-0.0201519		0.999	-0.0082648	-0.0070914	0.00209171
1	-0.0066067	-0.0005867	0.00025509		1	0.014693	0.00693836	0.00081628
1.001	-0.0040559	-0.0031376	0.00153052		1.001	-0.0018876	-0.0096423	-0.0081118
1.002	-0.0155348	-0.0005867	-0.0048466		1.002	0.00704039	-0.0083668	-0.0093872
1.003	-0.010433	-0.0082393	-0.0073975		1.003	-0.0031631	-0.0070914	0.00336715
1.004	-0.0040559	0.00068873	0.00025509		1.004	-0.0044385	-0.0045405	0.00846888
1.005	0.00614759	0.0159939	-0.017601		1.005	0.00321409	0.014591	-0.00301
1.006	-0.0091576	0.00068873	-0.0010203		1.006	0.00321409	0.00438749	-0.0144889
1.007	0.0099739	0.00579047	0.011734		1.007	-0.0018876	0.0120401	0.00846888
1.008	-0.0066067	0.0032396	-0.0163256		1.008	0.00959126	0.00311205	0.00719345
1.009	-0.0206365	0.00068873	-0.0086729		1.009	0.00193866	0.00183662	-0.00301
1.01	-0.0027804	-0.0005867	-0.0022958		1.01	0.00321409	0.00438749	0.00209171
1.011	0.0099739	0.00196417	-0.0022958		1.011	-0.0006122	0.00311205	-0.0093872
1.012	-0.0168102	0.00451504	-0.0188764		1.012	0.00959126	-0.0007142	0.00336715
1.013	-0.0040559	-0.0018621	-0.0124992		1.013	-0.0044385	-0.0083668	0.00846888
1.014	-0.0129839	0.00451504	0.00153052		1.014	-0.0031631	0.0120401	0.00974432
1.015	-0.0257383	0.00834134	-0.0061221		1.015	0.0223456	-0.005816	0.0110198
1.016	-0.021912	-0.0082393	-0.0061221		1.016	0.00959126	0.00566292	-0.0157644
1.017	-0.0002296	0.00196417	-0.0227027		1.017	-0.0069894	0.0184173	-0.0042855
1.018	-0.0078822	0.0121676	-0.0239782		1.018	0.00576496	0.0158664	0.00464258
1.019	-0.0282891	0.00451504	-0.0099484		1.019	0.00704039	0.00566292	0.0173969
1.02	-0.0295646	0.0274728	-0.0048466		1.02	0.00959126	0.00948922	-0.0017346
1.021	-0.0206365	0.0261974	-0.0137747		1.021	0.00321409	0.00693836	0.00336715
1.022	-0.0129839	0.0108922	-0.0035712		1.022	0.00831583	0.00566292	-0.0042855
1.023	-0.0117085	0.0223711	0.00280596		1.023	0.00448953	0.00566292	0.00209171
1.024	-0.0270137	0.0210957	-0.0137747		1.024	0.00704039	-0.0083668	0.00209171
1.025	-0.0066067	0.0223711	-0.0073975		1.025	-0.0006122	0.0222436	0.0224986
1.026	-0.010433	0.0070659	0.00535683		1.026	-0.0006122	-0.0070914	-0.0055609
1.027	-0.0078822	0.0210957	0.0142849		1.027	0.00704039	0.00056119	0.00846888
1.028	-0.0231874	0.0478798	-0.0048466		1.028	0.0134176	-0.0032651	-0.0068363
1.029	-0.0231874	0.024922	-0.0048466		1.029	0.00448953	0.0120401	0.0173969
1.03	-0.0168102	0.0223711	0.00663226		1.03	0.00831583	0.014591	0.0122952
1.031	-0.0180856	0.0325746	-0.0010203		1.031	0.014693	0.0133155	-0.0042855
1.032	-0.0142593	0.0312991	0.00918313		1.032	-0.0006122	0.0133155	0.00209171
1.033	-0.0142593	0.0300237	0.0130094		1.033	0.00321409	-0.0045405	0.00336715
1.034	-0.0270137	0.0236465	-0.0010203		1.034	0.00321409	0.00183662	0.0173969
1.035	-0.010433	0.0287483	0.0193866		1.035	0.00831583	0.00438749	-0.0055609
1.036	-0.021912	0.0274728	0.00025509		1.036	0.0134176	0.00311205	-0.00301
1.037	-0.0193611	0.0364009	0.0257638		1.037	-0.0031631	0.0107647	0.00464258
1.038	-0.0129839	0.03385	0.0283146		1.038	0.00193866	0.00566292	0.00719345
1.039	-0.010433	0.0274728	0.0219375		1.039	0.0108667	0.0107647	-0.0055609
1.04	-0.0142593	0.0236465	0.0104586		1.04	0.0134176	0.00183662	0.0135706
1.041	-0.0206365	0.0325746	0.0168357		1.041	0.00831583	0.00056119	0.00846888
1.042	-0.0129839	0.0274728	0.0295901		1.042	-0.0006122	-0.0007142	0.00846888
1.043	-0.0002296	0.0210957	0.041069		1.043	0.00321409	0.0209681	-0.0017346
1.044	-0.0231874	0.03385	0.0346918		1.044	0.0197947	0.00311205	0.00209171
1.045	0.00104586	0.0325746	0.0334164		1.045	-0.0006122	0.00566292	0.00081628
1.046	-0.021912	0.0312991	0.0359672		1.046	0.014693	-0.0007142	-0.0004592
1.047	-0.0168102	0.0274728	0.0321409		1.047	0.00193866	0.00311205	0.00846888
1.048	0.00104586	0.0440535	0.0168357		1.048	0.00831583	0.00311205	0.00719345
1.049	-0.0231874	0.03385	0.0346918		1.049	0.0185193	0.00438749	0.00081628
1.05	-0.0244628	0.042778	0.0270392		1.05	0.0121421	0.00566292	-0.0042855
1.051	-0.0002296	0.0325746	0.0487216		1.051	0.00576496	-0.0109177	-0.0055609
1.052	-0.0066067	0.0300237	0.0372427		1.052	0.00066323	0.00311205	0.00846888
1.053	-0.0257383	0.0351254	0.0346918		1.053	0.00704039	0.0107647	0.00081628
1.054	-0.0142593	0.0223711	0.0321409		1.054	0.00831583	0.0120401	0.00464258
1.055	-0.010433	0.0223711	0.0308655		1.055	0.00321409	0.00438749	0.00081628
1.056	-0.0244628	0.0210957	0.0283146		1.056	0.0172439	0.00438749	0.014846
1.057	-0.0066067	0.0223711	0.0321409		1.057	0.00704039	-0.0007142	0.00464258
1.058	0.00104586	0.0121676	0.0461707		1.058	-0.0018876	-0.0045405	-0.0042855
1.059	-0.001505	0.0364009	0.0512724		1.059	-0.0044385	0.0133155	0.00464258
1.06	-0.0040559	0.0287483	0.0385181		1.06	0.00321409	0.00566292	0.00081628
1.061	-0.03084	0.024922	0.0423444		1.061	0.00704039	-0.005816	0.00336715
1.062	-0.0091576	0.024922	0.0257638		1.062	-0.0057139	0.00183662	0.00209171
1.063	-0.0040559	0.0210957	0.0346918		1.063	0.0108667	-0.0070914	0.00464258
1.064	-0.0066067	0.00579047	0.00918313		1.064	0.00576496	0.00438749	0.00846888
1.065	-0.0142593	0.0210957	0.020662		1.065	0.00576496	-0.0070914	0.00464258
1.066	-0.0002296	0.00451504	0.0257638		1.066	0.0108667	-0.0032651	0.00336715
1.067	-0.0155348	0.0274728	0.0181112		1.067	0.00576496	-0.0019897	0.00846888
1.068	-0.0053313	0.0261974	0.0104586		1.068	0.00193866	-0.0070914	0.00081628
1.069	-0.0027804	0.0070659	0.0219375		1.069	0.00066323	0.0196927	0.00081628
1.07	-0.0180856	0.00961677	0.0359672		1.07	-0.0057139	-0.0070914	0.00974432
1.071	-0.0231874	0.00579047	0.0219375		1.071	-0.0120911	-0.0007142	0.00591802
1.072	-0.010433	0.0198202	0.00025509		1.072	-0.0018876	-0.0160194	0.0122952
1.073	-0.0040559	0.0108922	0.00663226		1.073	0.00959126	-0.0007142	0.0186724
1.074	-0.0027804	0.00451504	0.0142849		1.074	0.00066323	-0.0070914	0.00974432
1.075	-0.0142593	0.00196417	0.00663226		1.075	-0.0095402	0.00821379	0.00846888
1.076	-0.0040559	-0.0031376	0.00280596		1.076	0.00066323	0.00438749	-0.0017346
1.077	-0.0142593	0.0070659	0.00280596		1.077	0.00193866	0.00821379	0.0122952
1.078	-0.0129839	0.00068873	0.011734		1.078	-0.0069894	-0.0109177	0.00209171
1.079	-0.03084	-0.0082393	-0.0239782		1.079	-0.0171928	-0.0032651	0.00974432
1.08	-0.0180856	-0.0056884	-0.0048466		1.08	0.00321409	-0.0019897	0.0199478
1.081	-0.0040559	-0.0031376	-0.0086729		1.081	-0.0044385	0.00183662	0.014846
1.082	-0.0257383	-0.0018621	-0.0035712		1.082	-0.0006122	-0.0109177	0.00974432
1.083	-0.021912	-0.0095147	0.00918313		1.083	-0.0057139	-0.0019897	0.0110198
1.084	-0.0244628	-0.013341	0.00408139		1.084	0.023621	-0.0070914	0.0237741
1.085	-0.0091576	-0.0184428	-0.0061221		1.085	0.00704039	-0.0019897	0.00336715
1.086	-0.021912	-0.0171673	-0.0112238		1.086	-0.0006122	-0.0109177	0.0186724
1.087	-0.0193611	-0.0209936	0.0104586		1.087	-0.0069894	0.00056119	0.00974432
1.088	-0.0257383	-0.0082393	-0.0061221		1.088	0.00576496	-0.0007142	-0.0042855
1.089	-0.0295646	-0.0158919	-0.0010203		1.089	0.00704039	-0.0019897	0.00336715
1.09	-0.021912	-0.004413	-0.0022958		1.09	0.00448953	-0.0070914	-0.0068363
1.091	-0.0282891	-0.004413	-0.0099484		1.091	0.00193866	0.00821379	0.00591802
1.092	-0.0231874	-0.0248199	0.00408139		1.092	0.0108667	-0.0121931	0.00336715
1.093	-0.0142593	0.00068873	-0.0086729		1.093	0.00704039	0.00438749	0.00464258
1.094	-0.0333909	-0.0031376	-0.017601		1.094	0.00704039	-0.0070914	-0.0017346
1.095	-0.0333909	-0.0018621	-0.0227027		1.095	0.00576496	0.00693836	0.00081628
1.096	-0.0346663	-0.0095147	-0.0150501		1.096	0.00831583	0.00948922	0.0135706
1.097	-0.0270137	-0.0235445	0.00153052		1.097	0.00704039	0.0298962	-0.0093872
1.098	-0.0486961	-0.0082393	-0.0137747		1.098	0.0121421	0.0298962	0.00846888
1.099	-0.0525224	0.00068873	-0.0928516		1.099	0.0210702	0.0158664	0.0250495
1.1	-0.0869591	-0.042676	-0.152797		1.1	0.0108667	0.0222436	0.0122952
1.101	-0.144354	-0.103897	-0.240802		1.101	0.0172439	0.0273453	0.0224986
1.102	-0.227257	-0.177872	-0.340286		1.102	0.0248965	0.0452014	0.0403547
1.103	-0.27955	-0.270979	-0.409159		1.103	0.00959126	0.0196927	0.0122952
1.104	-0.345872	-0.352606	-0.513745		1.104	0.0338245	0.0400996	0.044181
1.105	-0.416021	-0.389594	-0.545631		1.105	0.00959126	0.023519	0.0250495
1.106	-0.501475	-0.48015	-0.586444		1.106	0.00959126	0.0349979	0.0339776
1.107	-0.555043	-0.498006	-0.625983		1.107	0.00576496	0.00948922	0.0378039
1.108	-0.585654	-0.531167	-0.641288		1.108	0.00959126	0.0362733	0.0110198
1.109	-0.608611	-0.534993	-0.650216		1.109	0.0172439	0.0196927	0.0250495
1.11	-0.636671	-0.543921	-0.642563		1.11	0.00321409	0.0222436	0.0314267
1.111	-0.655802	-0.543921	-0.661695		1.111	0.0159684	0.0337225	0.0314267
1.112	-0.654527	-0.536269	-0.650216		1.112	0.0159684	0.0298962	0.0186724
1.113	-0.649425	-0.534993	-0.648941		1.113	0.00321409	0.0247944	0.0224986
1.114	-0.659629	-0.518413	-0.628534		1.114	0.00576496	0.0337225	0.0314267
1.115	-0.668557	-0.494179	-0.605576		1.115	0.00576496	0.0133155	0.0237741
1.116	-0.653252	-0.477599	-0.592822		1.116	0.00066323	0.0375488	0.0186724
1.117	-0.650701	-0.475048	-0.597923		1.117	0.0108667	0.0286207	0.0314267
1.118	-0.640497	-0.467395	-0.557109		1.118	0.00321409	0.0260699	0.0314267
1.119	-0.626467	-0.454641	-0.531601		1.119	-0.0057139	0.0184173	0.0212232
1.12	-0.625192	-0.425306	-0.527774		1.12	0.00576496	0.0260699	0.0288758
1.121	-0.595857	-0.412552	-0.498439		1.121	0.00066323	0.0298962	0.0314267
1.122	-0.586929	-0.402348	-0.479308		1.122	0.0121421	0.0349979	0.0250495
1.123	-0.583103	-0.399797	-0.479308		1.123	-0.0133665	0.0311716	0.0276004
1.124	-0.55887	-0.380666	-0.471655		1.124	0.0159684	0.0286207	0.0263249
1.125	-0.542289	-0.370462	-0.429566		1.125	0.00704039	0.0298962	0.0263249
1.126	-0.515505	-0.346229	-0.419363		1.126	-0.0018876	0.0196927	0.0288758
1.127	-0.514229	-0.343678	-0.39768		1.127	0.00321409	0.0311716	0.0288758
1.128	-0.48617	-0.311792	-0.392578		1.128	0.00831583	0.0247944	0.0288758
1.129	-0.489996	-0.305415	-0.379824		1.129	0.0159684	0.0298962	0.0199478
1.13	-0.484894	-0.293936	-0.356866		1.13	0.0172439	0.0209681	0.0327021
1.131	-0.459386	-0.292661	-0.342836		1.131	0.00959126	0.0388242	0.0288758
1.132	-0.435152	-0.268428	-0.318603		1.132	0.00704039	0.0260699	0.035253
1.133	-0.422398	-0.248021	-0.323705		1.133	0.0108667	0.0349979	0.0301513
1.134	-0.41347	-0.227614	-0.289268		1.134	0.00831583	0.0273453	0.0224986
1.135	-0.41347	-0.237817	-0.276514		1.135	0.00448953	0.0349979	0.0288758
1.136	-0.386686	-0.230165	-0.243353		1.136	0.00576496	0.0209681	0.0186724
1.137	-0.359902	-0.197003	-0.247179		1.137	0.0185193	0.0337225	0.0250495
1.138	-0.331842	-0.1868	-0.251005		1.138	0.0210702	0.0286207	0.0339776
1.139	-0.342046	-0.1868	-0.231874		1.139	0.00959126	0.0196927	0.0186724
1.14	-0.322914	-0.1868	-0.193611		1.14	0.0210702	0.0452014	0.0250495
1.141	-0.320363	-0.176596	-0.192335		1.141	0.014693	0.023519	0.014846
1.142	-0.27955	-0.15619	-0.183407		1.142	0.023621	0.032447	0.0339776
1.143	-0.27955	-0.135783	-0.173204		1.143	0.0223456	0.0337225	0.0390793
1.144	-0.26552	-0.125579	-0.156623		1.144	0.0223456	0.0311716	0.0365284
1.145	-0.255316	-0.135783	-0.140043		1.145	0.0159684	0.0247944	0.0250495
1.146	-0.26552	-0.111549	-0.141318		1.146	0.0172439	0.0222436	0.0186724
1.147	-0.254041	-0.0898671	-0.126013		1.147	0.00959126	0.0349979	0.0250495
1.148	-0.229808	-0.0949688	-0.115809		1.148	0.0223456	0.032447	0.0288758
1.149	-0.227257	-0.0847653	-0.106881		1.149	0.0159684	0.032447	0.0212232
1.15	-0.210676	-0.0796636	-0.0711692		1.15	0.0172439	0.0260699	0.0263249
1.151	-0.204299	-0.0694601	-0.0813727		1.151	0.0185193	0.0400996	0.0199478
1.152	-0.22343	-0.0579812	-0.0775464		1.152	0.0197947	0.014591	0.0301513
1.153	-0.215778	-0.042676	-0.0698938		1.153	0.0172439	0.032447	0.0263249
1.154	-0.197922	-0.0490532	-0.0711692		1.154	0.0121421	0.023519	0.0237741
1.155	-0.185167	-0.0414006	-0.0673429		1.155	0.0134176	0.0247944	0.0212232
1.156	-0.174964	-0.0528795	-0.0507623		1.156	0.00831583	0.023519	0.0224986
1.157	-0.160934	-0.0260954	-0.0329062		1.157	0.0185193	0.0273453	0.0135706
1.158	-0.185167	-0.0273708	-0.0392834		1.158	0.00959126	0.023519	0.0237741
1.159	-0.159659	-0.0235445	-0.0329062		1.159	0.0134176	0.032447	0.0224986
1.16	-0.163485	-0.0222691	-0.0252536		1.16	0.014693	0.0247944	0.0224986
1.161	-0.152006	0.00451504	-0.0239782		1.161	0.0172439	0.0337225	0.0135706
1.162	-0.16221	0.00068873	-0.0035712		1.162	0.0121421	0.0184173	0.0161215
1.163	-0.141803	-0.0018621	-0.0086729		1.163	0.0159684	0.0260699	0.0339776
1.164	-0.143078	-0.0056884	-0.0150501		1.164	0.0325491	0.0209681	0.00846888
1.165	-0.155833	0.00961677	0.00280596		1.165	0.0299982	0.023519	0.0173969
1.166	-0.144354	0.0108922	0.0219375		1.166	0.00831583	0.0133155	0.00846888
1.167	-0.154557	0.0159939	0.00408139		1.167	0.0159684	0.0273453	0.0161215
1.168	-0.130324	0.0236465	0.0142849		1.168	0.0185193	0.0413751	0.0237741
1.169	-0.121396	0.0274728	0.00280596		1.169	0.0261719	0.0247944	0.00591802
1.17	-0.104815	0.0185448	0.0257638		1.17	0.0312736	0.0196927	0.0301513
1.171	-0.135426	0.0325746	0.0232129		1.171	0.0197947	0.023519	0.0135706
1.172	-0.116294	0.0300237	0.0270392		1.172	0.0197947	0.0196927	0.00591802
1.173	-0.132875	0.0300237	0.0257638		1.173	0.0223456	0.0247944	0.0161215
1.174	-0.111192	0.0478798	0.0436198		1.174	0.0172439	0.0286207	0.00846888
1.175	-0.108641	0.0517061	0.0436198		1.175	0.0223456	0.0260699	0.0276004
1.176	-0.107366	0.0453289	0.0346918		1.176	0.0363754	0.0158664	0.0173969
1.177	-0.0997134	0.0274728	0.0423444		1.177	0.0248965	0.023519	0.0237741
1.178	-0.0895099	0.0644604	0.0232129		1.178	0.0427525	0.0349979	0.0237741
1.179	-0.106091	0.0517061	0.0614759		1.179	0.0287228	0.0184173	0.0212232
1.18	-0.104815	0.0478798	0.0283146		1.18	0.052956	0.0273453	0.0237741
1.181	-0.0703784	0.0555324	0.0716794		1.181	0.044028	0.0298962	0.0250495
1.182	-0.100989	0.0555324	0.0550987		1.182	0.0478543	0.0247944	0.0250495
1.183	-0.0869591	0.0504306	0.058925		1.183	0.052956	0.0375488	0.0186724
1.184	-0.078031	0.0478798	0.058925		1.184	0.0504051	0.0349979	0.0237741
1.185	-0.0716539	0.0695622	0.0512724		1.185	0.0759138	0.0490277	0.0416302
1.186	-0.0588995	0.0772147	0.0525479		1.186	0.0835664	0.0286207	0.0339776
1.187	-0.060175	0.0695622	0.0563742		1.187	0.0924945	0.0490277	0.0250495
1.188	-0.0448698	0.0644604	0.0716794		1.188	0.0899436	0.0503031	0.0378039
1.189	-0.0537978	0.0733884	0.058925		1.189	0.091219	0.0413751	0.0416302
1.19	-0.0563487	0.0695622	0.0525479		1.19	0.111626	0.0605066	0.0378039
1.191	-0.060175	0.0542569	0.0716794		1.191	0.130757	0.07071	0.0518336
1.192	-0.0448698	0.0695622	0.0614759		1.192	0.126931	0.0656083	0.0607617
1.193	-0.0372172	0.0861428	0.0602005		1.193	0.148613	0.0796381	0.0492828
1.194	-0.0410435	0.0682867	0.0602005		1.194	0.130757	0.0872907	0.0760669
1.195	-0.0346663	0.0644604	0.0640268		1.195	0.167745	0.111524	0.0811686
1.196	-0.0270137	0.0759393	0.058925		1.196	0.161368	0.106422	0.101576
1.197	-0.0270137	0.0772147	0.0576496		1.197	0.176673	0.114075	0.0990247
1.198	-0.0295646	0.0810411	0.0831583		1.198	0.175398	0.12938	0.118156
1.199	-0.0053313	0.0937954	0.0971881		1.199	0.188152	0.147236	0.116881
1.2	0.0150756	0.0886936	0.0933618		1.2	0.186876	0.158715	0.148767

## Sheet: Fig.1C
	Liposome (+YeeE) 1.25 mM thiosulfate					Liposome (+YeeE) 2.5 mM thiosulfate					Liposome (+YeeE) 5 mM thiosulfate					Liposome (+YeeE) 10 mM thiosulfate					Liposome (+YeeE) 20 mM thiosulfate					Liposome (+YeeE) 40 mM thiosulfate				Note
	n1	n2	n3			n1	n2	n3			n1	n2	n3			n1	n2	n3			n1	n2	n3			n1	n2	n3		Raw data of Surfe2r N1 measurement.
time (s)	Amplitude (nA)	Amplitude (nA)	Amplitude (nA)		time (s)	Amplitude (nA)	Amplitude (nA)	Amplitude (nA)		time (s)	Amplitude (nA)	Amplitude (nA)	Amplitude (nA)		time (s)	Amplitude (nA)	Amplitude (nA)	Amplitude (nA)		time (s)	Amplitude (nA)	Amplitude (nA)	Amplitude (nA)		time (s)	Amplitude (nA)	Amplitude (nA)	Amplitude (nA)		Graph was prepared based on measured raw data using Prism 9 (Version 9.2.0) for each thiosulfate concentration.
1.07	-0.0010003	-0.0016256	0.00877798		1.07	0.0167057	-0.0401136	-0.0511424		1.07	-0.0247584	-0.0134296	0.0110288		1.07	0.0223826	0.067623	0.023658		1.07	-0.0174309	-0.0332113	-0.0144299		1.07	0.0629714	-0.038263	0.00157553		From plotted graphs, negative peak areas were calculated using Prism 9 (Version 9.2.0)'s "area under the curve" function giving the mean values and standard errors.
1.071	0.0219575	-0.0169308	-0.0014255		1.071	0.00777764	-0.0184313	-0.0536933		1.071	-0.0222076	-0.0185313	0.0237831		1.071	0.0172809	0.0791019	-0.0018506		1.071	-0.0110538	-0.0026009	-0.0297351		1.071	0.0565943	-0.0165806	0.00285097
1.072	-0.0112038	-0.0182062	-0.0103535		1.072	0.0218074	-0.032461	-0.0485915		1.072	-0.0247584	-0.0134296	0.0123042		1.072	0.0121791	0.067623	0.0249335		1.072	-0.005952	-0.0102535	0.0008753		1.072	0.0489417	-0.0229578	-0.0162805
1.073	0.00537683	-0.0233079	0.00240081		1.073	0.020532	-0.0260839	-0.0600704		1.073	-0.0336865	-0.0172559	0.00210071		1.073	0.0121791	0.0791019	0.0160054		1.073	0.00297601	-0.0230078	-0.0131545		1.073	0.0349119	-0.0242332	-0.0137297
1.074	0.00665227	-0.002901	0.00622711		1.074	0.0192566	-0.0273593	-0.049867		1.074	-0.0247584	-0.0096033	0.00210071		1.074	0.0287598	0.0778265	0.023658		1.074	-0.0072275	-0.0140798	-0.0093282		1.074	0.032361	-0.029335	-0.0124542
1.075	0.0194066	-0.0207571	0.00750255		1.075	0.0307355	-0.0515925	-0.0447652		1.075	-0.0336865	-0.0223576	-0.0208571		1.075	0.0262089	0.0548687	0.0109037		1.075	-0.0097783	-0.0230078	0.00215073		1.075	0.0145049	-0.0280595	-0.0022508
1.076	0.0130294	-0.0067273	0.00112538		1.076	0.0307355	-0.0222576	-0.0728248		1.076	-0.0196567	-0.0134296	-0.0081028		1.076	0.0325861	0.0535932	0.00325111		1.076	0.00042514	-0.008978	-0.0067773		1.076	0.0196067	-0.0331613	-0.0073525
1.077	0.011754	-0.0092782	0.00750255		1.077	0.0320109	-0.0222576	-0.058795		1.077	-0.0375128	-0.0070524	0.00337614		1.077	0.0172809	0.0791019	0.0160054		1.077	-0.0072275	-0.0153552	-0.0016756		1.077	0.00685233	-0.0165806	-0.0201068
1.078	-0.0035512	-0.0233079	0.00750255		1.078	0.0345618	-0.0362873	-0.0447652		1.078	-0.0183813	-0.023633	0.00975331		1.078	0.0313106	0.0854791	0.0262089		1.078	-0.0072275	-0.0026009	0.00597703		1.078	0.0221575	-0.0102035	-0.0022508
1.079	-0.0061021	-0.0194816	0.00622711		1.079	0.0332863	-0.0158804	-0.049867		1.079	-0.003076	-0.0108787	0.00975331		1.079	0.0249335	0.076551	-0.0018506		1.079	-0.0238081	-0.038313	-0.002951		1.079	0.00685233	-0.0076526	-0.0099034
1.08	0.0143049	-0.0054519	0.00495168		1.08	0.020532	-0.032461	-0.0485915		1.08	-0.0247584	-0.0032261	0.00465158		1.08	0.0287598	0.0650721	0.00580197		1.08	-0.0123292	-0.0230078	-0.0361123		1.08	0.0145049	-0.0153052	-0.0009753
1.081	0.0041014	-0.0131045	-0.0027009		1.081	0.020532	-0.0197067	-0.0332863		1.081	-0.0209321	-0.0134296	-0.0195817		1.081	0.0262089	0.0867545	0.0109037		1.081	0.00042514	-0.0255587	-0.0106036		1.081	0.0132295	-0.0395384	-0.0252086
1.082	0.0002751	-0.0233079	0.00495168		1.082	0.0256337	-0.0120541	-0.0065022		1.082	-0.0094532	-0.005777	-0.0221325		1.082	0.0070774	0.0688984	-0.0044015		1.082	-0.026359	-0.0281095	-0.0144299		1.082	0.00430146	-0.0395384	-0.0328612
1.083	0.0168557	-0.0373377	-0.0103535		1.083	0.0179811	-0.014605	-0.02946		1.083	-0.0056269	0.00442651	-0.0272343		1.083	-0.0005752	0.0612458	-0.0031261		1.083	-0.0097783	-0.0408639	-0.0310105		1.083	-0.0122792	-0.0433647	-0.0226577
1.084	-0.0099284	-0.0156553	-0.0014255		1.084	0.00650221	0.00962827	-0.0243583		1.084	-0.0158304	-0.0006752	-0.0144799		1.084	0.0160054	0.0574195	0.00707741		1.084	-0.0072275	-0.0357622	-0.0233579		1.084	-0.0403387	-0.0497419	-0.0201068
1.085	-0.0061021	-0.0080027	-0.0129044		1.085	0.0307355	-0.0133295	-0.0192565		1.085	0.0135046	-0.0108787	0.00465158		1.085	0.00580197	0.067623	-0.0095032		1.085	-0.0301853	-0.0204569	-0.0310105		1.085	-0.0275844	-0.0433647	-0.0315857
1.086	0.0130294	-0.0258588	0.0100534		1.086	0.0230828	-0.0005752	-0.0026759		1.086	-0.0005252	-0.005777	-0.0144799		1.086	0.0032511	0.0637967	-0.0095032		1.086	-0.0187064	-0.0255587	-0.0475912		1.086	-0.0365124	-0.0267841	-0.0124542
1.087	0.00282596	-0.0067273	0.00240081		1.087	0.0332863	-0.0005752	-0.0103285		1.087	0.0135046	-0.005777	-0.0055519		1.087	0.0211072	0.0727247	0.00580197		1.087	-0.0187064	-0.0268341	-0.0220825		1.087	-0.0747754	-0.0318858	-0.0099034
1.088	0.00155053	-0.0296851	0.00495168		1.088	0.0103285	-0.0005752	-0.0014005		1.088	-0.0081778	-0.014705	0.00720245		1.088	0.00452654	0.0791019	0.00197567		1.088	-0.0136046	-0.0268341	-0.0182562		1.088	-0.0735	-0.0114789	-0.0048016
1.089	0.0143049	-0.0182062	0.00240081		1.089	0.0179811	-0.0082278	0.0113539		1.089	-0.0069023	0.00697738	0.00847788		1.089	0.00962827	0.0663476	0.00197567		1.089	-0.0085029	-0.0128043	-0.0259088		1.089	-0.0722246	-0.0140298	0.00157553
1.09	-0.0022758	-0.0296851	0.00112538		1.09	0.0179811	-0.0056769	0.00497669		1.09	-0.0005252	-0.005777	0.00465158		1.09	0.0185563	0.0421143	0.0211072		1.09	-0.0008503	-0.0102535	-0.0208071		1.09	-0.0722246	-0.0025509	-0.0201068
1.091	0.00920313	-0.0258588	0.0189815		1.091	0.0243583	-0.0171558	0.0100784		1.091	0.00457656	0.00825281	0.0199568		1.091	-0.0095032	0.0561441	0.01473		1.091	-0.0123292	-0.0230078	-0.0157053		1.091	-0.114314	-0.0063772	-0.0073525
1.092	-0.0163055	-0.0105536	0.00495168		1.092	0.0230828	-0.0044015	0.0151802		1.092	0.0186063	0.0171809	-0.0119291		1.092	-0.0107787	0.0688984	0.0300352		1.092	-0.0123292	-0.0230078	-0.0195316		1.092	-0.101559	-0.0178561	-0.0137297
1.093	0.0168557	-0.0054519	-0.0167307		1.093	0.0103285	-0.0005752	0.0126293		1.093	0.00967829	-0.005777	-0.0042765		1.093	-0.0056769	0.0510424	0.0109037		1.093	-0.0097783	-0.0638217	-0.0386631		1.093	-0.121967	0.0153052	-0.0226577
1.094	-0.0086529	-0.0271342	-0.0129044		1.094	0.0141548	0.0121791	0.0190065		1.094	0.0326361	0.00825281	0.00592701		1.094	-0.0949573	-0.0127293	0.00707741		1.094	-0.005952	-0.121216	-0.0552438		1.094	-0.142373	-0.0216824	-0.0991837
1.095	-0.0137547	-0.0233079	-0.00015		1.095	0.0141548	0.01473	0.0164556		1.095	0.0364624	-0.0555189	-0.0004502		1.095	-0.165106	-0.076501	-0.0248084		1.095	-0.0493168	-0.197742	-0.139422		1.095	-0.155128	-0.100759	-0.203769
1.096	-0.0022758	-0.0105536	-0.00015		1.096	0.0167057	0.0172809	-0.0065022		1.096	0.0377378	-0.112913	-0.0438149		1.096	-0.204645	-0.154302	-0.121741		1.096	-0.142423	-0.218149	-0.181512		1.096	-0.246959	-0.198968	-0.219075
1.097	0.0002751	-0.0220325	0.0228078		1.097	0.038388	0.00962827	-0.0409389		1.097	0.00457656	-0.163931	-0.121616		1.097	-0.239081	-0.188739	-0.182962		1.097	-0.229153	-0.256412	-0.229978		1.097	-0.327311	-0.200243	-0.258613
1.098	-0.0073775	-0.0258588	0.00750255		1.098	0.0103285	0.00580197	-0.108537		1.098	-0.0898055	-0.17541	-0.144574		1.098	-0.258213	-0.209146	-0.225052		1.098	-0.261039	-0.272993	-0.233804		1.098	-0.431897	-0.233404	-0.26499
1.099	0.00920313	-0.0449903	-0.0129044		1.099	-0.0521677	0.00070024	-0.144249		1.099	-0.145925	-0.207295	-0.19049		1.099	-0.279895	-0.242307	-0.242908		1.099	-0.309505	-0.297226	-0.275894		1.099	-0.435723	-0.258913	-0.291774
1.1	0.0130294	-0.0692235	-0.029485		1.1	-0.0827781	-0.0260839	-0.186338		1.1	-0.19184	-0.208571	-0.208346		1.1	-0.306679	-0.251235	-0.25056		1.1	-0.323535	-0.281921	-0.27972		1.1	-0.481639	-0.281871	-0.308355
1.101	-0.0073775	-0.0972831	-0.0664726		1.101	-0.10446	-0.091131	-0.195266		1.101	-0.210972	-0.253211	-0.208346		1.101	-0.324535	-0.261439	-0.268416		1.101	-0.349044	-0.285747	-0.312881		1.101	-0.525003	-0.292074	-0.335139
1.102	-0.0316107	-0.120241	-0.097083		1.102	-0.145274	-0.130669	-0.202919		1.102	-0.2199	-0.25066	-0.236405		1.102	-0.334739	-0.251235	-0.269692		1.102	-0.33884	-0.302328	-0.323085		1.102	-0.536482	-0.33799	-0.341516
1.103	-0.0354371	-0.158504	-0.118765		1.103	-0.179711	-0.163831	-0.223326		1.103	-0.241582	-0.273618	-0.268291		1.103	-0.356421	-0.269091	-0.302853		1.103	-0.388582	-0.30998	-0.333288		1.103	-0.546686	-0.344367	-0.341516
1.104	-0.0864544	-0.17636	-0.150651		1.104	-0.210321	-0.198267	-0.218224		1.104	-0.273468	-0.274893	-0.260639		1.104	-0.362798	-0.274193	-0.299027		1.104	-0.392408	-0.304879	-0.335839		1.104	-0.576021	-0.316308	-0.359372
1.105	-0.100484	-0.184013	-0.132795		1.105	-0.239656	-0.20592	-0.242457		1.105	-0.291324	-0.310606	-0.281046		1.105	-0.370451	-0.281846	-0.315607		1.105	-0.402612	-0.312531	-0.360073		1.105	-0.54541	-0.350744	-0.365749
1.106	-0.124717	-0.219725	-0.160855		1.106	-0.253686	-0.226327	-0.257763		1.106	-0.316833	-0.332288	-0.295075		1.106	-0.397235	-0.309905	-0.327086		1.106	-0.42557	-0.320184	-0.344767		1.106	-0.558165	-0.374978	-0.383605
1.107	-0.13237	-0.23503	-0.196567		1.107	-0.284297	-0.244183	-0.262864		1.107	-0.332138	-0.348869	-0.300177		1.107	-0.409989	-0.300977	-0.342392		1.107	-0.445977	-0.320184	-0.361348		1.107	-0.568368	-0.377528	-0.407839
1.108	-0.180837	-0.241407	-0.216974		1.108	-0.30853	-0.263315	-0.276894		1.108	-0.347443	-0.365449	-0.309105		1.108	-0.413816	-0.325211	-0.347493		1.108	-0.421743	-0.30998	-0.374102		1.108	-0.560716	-0.378804	-0.38233
1.109	-0.169358	-0.26564	-0.242482		1.109	-0.314907	-0.299027	-0.276894		1.109	-0.361473	-0.374377	-0.304003		1.109	-0.408714	-0.320109	-0.357697		1.109	-0.433222	-0.289573	-0.361348		1.109	-0.531381	-0.392834	-0.377228
1.11	-0.188489	-0.300077	-0.245033		1.11	-0.350619	-0.300302	-0.303678		1.11	-0.393359	-0.387132	-0.311656		1.11	-0.420193	-0.320109	-0.355146		1.11	-0.430671	-0.301052	-0.363899		1.11	-0.536482	-0.405588	-0.393809
1.111	-0.20507	-0.298802	-0.266716		1.111	-0.356996	-0.336014	-0.307505		1.111	-0.397185	-0.408814	-0.301453		1.111	-0.408714	-0.317558	-0.369176		1.111	-0.434498	-0.283196	-0.362623		1.111	-0.539033	-0.385181	-0.369576
1.112	-0.217824	-0.316658	-0.267991		1.112	-0.349344	-0.352595	-0.298577		1.112	-0.397185	-0.383305	-0.318033		1.112	-0.403612	-0.313732	-0.362798		1.112	-0.435773	-0.283196	-0.35242		1.112	-0.510974	-0.367325	-0.346618
1.113	-0.240782	-0.339616	-0.288398		1.113	-0.362098	-0.336014	-0.327912		1.113	-0.393359	-0.371826	-0.32441		1.113	-0.383205	-0.298426	-0.366625		1.113	-0.42557	-0.266616	-0.334564		1.113	-0.52883	-0.3686	-0.352995
1.114	-0.247159	-0.323035	-0.283296		1.114	-0.374852	-0.35132	-0.307505		1.114	-0.39591	-0.355246	-0.323135		1.114	-0.376828	-0.292049	-0.35132		1.114	-0.429396	-0.23473	-0.309055		1.114	-0.496944	-0.353295	-0.318558
1.115	-0.259913	-0.321759	-0.288398		1.115	-0.362098	-0.339841	-0.306229		1.115	-0.392083	-0.355246	-0.309105		1.115	-0.360247	-0.290774	-0.33729		1.115	-0.406438	-0.232179	-0.300127		1.115	-0.486741	-0.33799	-0.331313
1.116	-0.252261	-0.310281	-0.262889		1.116	-0.358272	-0.327086	-0.289648		1.116	-0.388257	-0.346318	-0.305279		1.116	-0.33729	-0.285672	-0.338565		1.116	-0.380929	-0.216874	-0.291199		1.116	-0.458681	-0.336715	-0.322385
1.117	-0.266291	-0.309005	-0.238656		1.117	-0.351895	-0.343667	-0.298577		1.117	-0.379329	-0.336114	-0.296351		1.117	-0.324535	-0.275469	-0.342392		1.117	-0.361798	-0.214323	-0.269517		1.117	-0.448477	-0.298451	-0.275194
1.118	-0.261189	-0.302628	-0.26544		1.118	-0.326386	-0.321985	-0.284547		1.118	-0.341066	-0.314432	-0.286147		1.118	-0.318158	-0.242307	-0.311781		1.118	-0.349044	-0.181162	-0.268241		1.118	-0.403837	-0.297176	-0.272643
1.119	-0.242057	-0.296251	-0.259063		1.119	-0.340416	-0.347493	-0.274343		1.119	-0.328312	-0.297851	-0.259363		1.119	-0.297751	-0.238481	-0.306679		1.119	-0.336289	-0.169683	-0.254211		1.119	-0.378329	-0.269116	-0.26499
1.12	-0.240782	-0.306454	-0.241207		1.12	-0.327661	-0.33729	-0.261589		1.12	-0.327036	-0.274893	-0.274668		1.12	-0.281171	-0.234655	-0.287548		1.12	-0.329912	-0.151827	-0.22105		1.12	-0.346443	-0.252536	-0.210147
1.121	-0.22165	-0.280946	-0.209321		1.121	-0.293225	-0.32326	-0.25011		1.121	-0.293875	-0.273618	-0.258088		1.121	-0.255662	-0.244858	-0.307955		1.121	-0.305679	-0.142899	-0.201919		1.121	-0.326036	-0.246159	-0.221625
1.122	-0.239507	-0.264365	-0.200393		1.122	-0.297051	-0.313057	-0.241182		1.122	-0.304078	-0.259588	-0.247884		1.122	-0.254387	-0.224451	-0.301578		1.122	-0.291649	-0.113564	-0.177685		1.122	-0.287773	-0.232129	-0.217799
1.123	-0.225477	-0.259263	-0.205495		1.123	-0.284297	-0.300302	-0.228428		1.123	-0.288773	-0.243008	-0.250435		1.123	-0.239081	-0.192565	-0.267141		1.123	-0.275068	-0.0944321	-0.167482		1.123	-0.275018	-0.200243	-0.184638
1.124	-0.216549	-0.251611	-0.178711		1.124	-0.289398	-0.279895	-0.206745		1.124	-0.26454	-0.223876	-0.230028		1.124	-0.232704	-0.193841	-0.269692		1.124	-0.269967	-0.0893304	-0.143249		1.124	-0.250785	-0.196417	-0.173159
1.125	-0.179561	-0.242682	-0.188914		1.125	-0.268991	-0.29265	-0.201644		1.125	-0.228828	-0.216224	-0.232579		1.125	-0.221225	-0.186188	-0.240357		1.125	-0.255937	-0.0740252	-0.139422		1.125	-0.239306	-0.179836	-0.152752
1.126	-0.189765	-0.232479	-0.177435		1.126	-0.268991	-0.273518	-0.193991		1.126	-0.235205	-0.211122	-0.198142		1.126	-0.20592	-0.175985	-0.248009		1.126	-0.24956	-0.076576	-0.115189		1.126	-0.224001	-0.155603	-0.0953574
1.127	-0.17701	-0.20697	-0.149376		1.127	-0.240932	-0.25056	-0.199093		1.127	-0.226277	-0.200918	-0.182837		1.127	-0.204645	-0.181087	-0.235255		1.127	-0.216399	-0.0459656	-0.099884		1.127	-0.201043	-0.139022	0.00157553
1.128	-0.165531	-0.189114	-0.140448		1.128	-0.234555	-0.253111	-0.165931		1.128	-0.19184	-0.176685	-0.191765		1.128	-0.190615	-0.168332	-0.213573		1.128	-0.192165	-0.0485165	-0.0935068		1.128	-0.19084	-0.130094	0.0321859
1.129	-0.175735	-0.199318	-0.154477		1.129	-0.230728	-0.212297	-0.163381		1.129	-0.186739	-0.176685	-0.182837		1.129	-0.17531	-0.158129	-0.203369		1.129	-0.19089	-0.0332113	-0.0909559		1.129	-0.1462	-0.122442	0.0079527
1.13	-0.157879	-0.169983	-0.135346		1.13	-0.228178	-0.194441	-0.140423		1.13	-0.13317	-0.160104	-0.177735		1.13	-0.177861	-0.147925	-0.204645		1.13	-0.189614	-0.0332113	-0.0654473		1.13	-0.147475	-0.0956575	-0.0150051
1.131	-0.138747	-0.158504	-0.112388		1.131	-0.215423	-0.179136	-0.130219		1.131	-0.114039	-0.157554	-0.184113		1.131	-0.153627	-0.145374	-0.196992		1.131	-0.185788	-0.0242832	-0.0514175		1.131	-0.123242	-0.0841786	-0.0468909
1.132	-0.124717	-0.161055	-0.11749		1.132	-0.203944	-0.153627	-0.140423		1.132	-0.0859792	-0.153727	-0.177735		1.132	-0.139598	-0.122417	-0.170208		1.132	-0.178136	-0.0140798	-0.0437649		1.132	-0.120691	-0.0829032	-0.0621961
1.133	-0.113239	-0.166157	-0.0958076		1.133	-0.180986	-0.129394	-0.137872		1.133	-0.0553688	-0.134596	-0.167532		1.133	-0.130669	-0.123692	-0.166382		1.133	-0.167932	-0.0128043	-0.0348368		1.133	-0.102835	-0.0726997	-0.0660224
1.134	-0.113239	-0.143199	-0.100909		1.134	-0.173334	-0.110262	-0.120016		1.134	-0.0375128	-0.119291	-0.161155		1.134	-0.135771	-0.117315	-0.171483		1.134	-0.153902	0.00122538	-0.0348368		1.134	-0.0735	-0.0688734	-0.0583698
1.135	-0.106861	-0.13172	-0.0830532		1.135	-0.151651	-0.105161	-0.10216		1.135	-0.0107286	-0.125668	-0.1484		1.135	-0.135771	-0.105836	-0.167657		1.135	-0.150076	0.0127043	-0.0093282		1.135	-0.0875298	-0.0331613	-0.0545435
1.136	-0.113239	-0.126618	-0.0741252		1.136	-0.156753	-0.0592451	-0.109812		1.136	0.0249835	-0.121841	-0.156053		1.136	-0.13322	-0.0969079	-0.152352		1.136	-0.123292	-0.0115289	-0.0195316		1.136	-0.064572	-0.0408139	-0.0417892
1.137	-0.0915561	-0.125343	-0.0894304		1.137	-0.142724	-0.0426645	-0.0817528		1.137	0.0619711	-0.0950573	-0.120341		1.137	-0.117915	-0.0790519	-0.13322		1.137	-0.113088	0.0165306	-0.0080527		1.137	-0.0683983	-0.0420893	-0.0366875
1.138	-0.0928316	-0.104936	-0.0562691		1.138	-0.150376	-0.0222576	-0.0741002		1.138	0.0900306	-0.0899556	-0.144574		1.138	-0.11664	-0.0918062	-0.13322		1.138	-0.119466	0.0216324	0.00215073		1.138	-0.0428896	-0.0153052	-0.0226577
1.139	-0.0966579	-0.107486	-0.0626463		1.139	-0.138897	0.00452654	-0.103435		1.139	0.107887	-0.0963328	-0.125443		1.139	-0.100059	-0.0892553	-0.130669		1.139	-0.127118	0.0203569	0.00725247		1.139	-0.0518176	0.00127543	-0.0252086
1.14	-0.0877298	-0.0819779	-0.0371376		1.14	-0.123592	0.0313106	-0.0843037		1.14	0.134671	-0.0925065	-0.115239		1.14	-0.0885801	-0.0943571	-0.117915		1.14	-0.105436	0.0267341	0.0161805		1.14	-0.0326861	0.0153052	-0.0226577
1.141	-0.0583949	-0.0845287	-0.05882		1.141	-0.103185	0.0453404	-0.0613459		1.141	0.160179	-0.0669978	-0.10376		1.141	-0.0975082	-0.0777764	-0.111538		1.141	-0.0939569	0.047141	0.0212822		1.141	-0.0084529	-0.0153052	-0.0162805
1.142	-0.0622212	-0.088355	-0.029485		1.142	-0.0955325	0.0657473	-0.0638967		1.142	0.169107	-0.0542434	-0.102485		1.142	-0.0962327	-0.0662975	-0.117915		1.142	-0.0812026	0.038213	0.00597703		1.142	-0.01483	0.0204069	-0.0086279
1.143	-0.0660475	-0.0679481	-0.029485		1.143	-0.094257	0.082328	-0.0536933		1.143	0.175485	-0.0669978	-0.0897305		1.143	-0.0873047	-0.0624712	-0.0936819		1.143	-0.0761009	0.0509673	0.0161805		1.143	-0.0008003	0.00127543	0.00540183
1.144	-0.0481914	-0.0717744	-0.0180061		1.144	-0.0904307	0.105286	-0.049867		1.144	0.212472	-0.0733749	-0.0859042		1.144	-0.0719995	-0.0458906	-0.0860293		1.144	-0.0773763	0.0611708	0.0187314		1.144	0.0170558	0.0229578	-0.0060771
1.145	-0.0379879	-0.0539183	-0.0269342		1.145	-0.0815027	0.130794	-0.049867		1.145	0.217574	-0.0593452	-0.0910059		1.145	-0.0566943	-0.0267591	-0.0873047		1.145	-0.0722746	0.0522428	0.0378629		1.145	0.0170558	0.0306104	0.00540183
1.146	-0.0609457	-0.050092	-0.0231079		1.146	-0.0457906	0.151201	-0.02946		1.146	0.250735	-0.0363874	-0.079527		1.146	-0.061796	-0.0433397	-0.0745504		1.146	-0.0467659	0.0573445	0.0416892		1.146	0.0132295	0.0331613	0.0296351
1.147	-0.0354371	-0.0488166	-0.011629		1.147	-0.0419643	0.163956	-0.0383881		1.147	0.257112	-0.0351119	-0.0808025		1.147	-0.0643469	-0.0254837	-0.0694486		1.147	-0.0556939	0.0331113	0.04424		1.147	0.0298102	0.0318859	0.0309105
1.148	-0.0214073	-0.0386131	0.00495168		1.148	-0.038138	0.171608	-0.0332863		1.148	0.245633	-0.0223576	-0.0922814		1.148	-0.0388382	-0.0203819	-0.0656223		1.148	-0.0289098	0.0662725	0.0429646		1.148	0.0119541	0.0446402	0.0143299
1.149	-0.0341616	-0.0373377	0.0164306		1.149	-0.0113539	0.167782	-0.020532		1.149	0.281346	-0.0261839	-0.0667727		1.149	-0.0158804	-0.00635216	-0.0605206		1.149	-0.0505922	0.0624462	0.0518926		1.149	0.0387382	0.0573945	0.041114
1.15	-0.0226827	-0.0424394	0.0330112		1.15	-0.0253836	0.195842	-0.0090531		1.15	0.282621	-0.0096033	-0.0667727		1.15	-0.0426645	-0.0101785	-0.052868		1.15	-0.035287	0.0496919	0.0429646		1.15	0.0336365	0.0599454	0.0347368
1.151	-0.0354371	-0.0271342	0.0138797		1.151	-0.0266591	0.198392	-0.0154302		1.151	0.288998	-0.014705	-0.0667727		1.151	-0.0299102	0.00257587	-0.0605206		1.151	-0.0161555	0.0407639	0.055719		1.151	0.0451154	0.0612208	0.0385631
1.152	-0.0073775	-0.0182062	0.0291849		1.152	-0.0266591	0.220075	-0.0141548		1.152	0.318333	-0.0045015	-0.0603955		1.152	-0.0388382	0.0217074	-0.0439399		1.152	-0.0378379	0.0458656	0.0582698		1.152	0.0336365	0.0599454	0.041114
1.153	-0.0112038	-0.0258588	0.047041		1.153	-0.017731	0.229003	-0.0103285		1.153	0.327261	0.0159054	-0.0552938		1.153	-0.0350119	0.0166056	-0.0337365		1.153	-0.0161555	0.0458656	0.0608207		1.153	0.0463908	0.0624963	0.0245333
1.154	-0.0010003	-0.0169308	0.047041		1.154	0.00267591	0.231554	-0.0103285		1.154	0.332363	0.0171809	-0.0565692		1.154	-0.0273593	0.0421143	-0.0031261		1.154	-0.0289098	0.0547936	0.0416892		1.154	0.0463908	0.0688734	0.0513175
1.155	0.0155803	-0.0041764	0.0457656		1.155	0.00012504	0.232829	-0.0128794		1.155	0.351494	0.00315108	-0.0501921		1.155	-0.032461	0.0484915	-0.0069524		1.155	-0.0174309	0.0535182	0.0582698		1.155	0.0642469	0.0880049	0.0449403
1.156	0.0041014	-0.0016256	0.0699988		1.156	0.00267591	0.243033	-0.0026759		1.156	0.359147	0.0210071	-0.0514675		1.156	-0.023533	0.0637967	0.0185563		1.156	-0.0097783	0.0624462	0.0480664		1.156	0.0514925	0.0739752	0.0449403
1.157	0.0130294	-0.002901	0.0661725		1.157	0.00522678	0.255787	-0.0077776		1.157	0.368075	0.0248334	-0.0654973		1.157	-0.0209821	0.0701739	0.0338615		1.157	-0.0136046	0.0713743	0.0620961		1.157	0.0667977	0.0867295	0.0564192
1.158	-0.0112038	-0.002901	0.0648971		1.158	-0.0049767	0.251961	0.00115039		1.158	0.388482	0.0567193	-0.0361623		1.158	-0.0005752	0.0637967	0.0568193		1.158	-0.005952	0.0637217	0.0531681		1.158	0.0540434	0.0956575	0.0615209
1.159	0.0041014	0.00220075	0.0776514		1.159	0.020532	0.274918	0.00115039		1.159	0.396135	0.0414141	-0.0285097		1.159	0.00197567	0.0778265	0.0517176		1.159	-0.0034012	0.0624462	0.0455155		1.159	0.0540434	0.0982084	0.0538683
1.16	0.0168557	0.00475161	0.094232		1.16	0.00905308	0.271092	-0.000125		1.16	0.408889	0.0465158	-0.0348869		1.16	-0.0107787	0.0854791	0.0593702		1.16	0.0144549	0.0496919	0.0518926		1.16	0.061696	0.0905558	0.0538683
1.161	0.0143049	0.00475161	0.114639		1.161	0.00522678	0.286397	0.0100784		1.161	0.402512	0.052893	-0.0297851		1.161	-0.0082278	0.0880299	0.0746754		1.161	0.00042514	0.0356621	0.0340366		1.161	0.0604206	0.0905558	0.0717244
1.162	0.0143049	0.00730248	0.0993338		1.162	0.0230828	0.287673	0.00625212		1.162	0.415266	0.0681982	-0.0259588		1.162	0.0070774	0.10206	0.0925314		1.162	0.00680231	0.0509673	0.0671978		1.162	0.061696	0.0841786	0.0627964
1.163	0.011754	0.0200568	0.0980583		1.163	0.0128794	0.282571	0.00880299		1.163	0.410164	0.0694737	-0.0272343		1.163	-0.0069524	0.119916	0.10401		1.163	0.0157304	0.0522428	0.0480664		1.163	0.0565943	0.0854541	0.0704489
1.164	0.0143049	-0.0003501	0.109537		1.164	0.0345618	0.281296	-0.0103285		1.164	0.431847	0.0733	-0.0399886		1.164	-0.0005752	0.114814	0.112938		1.164	-0.0008503	0.0420393	0.04424		1.164	0.0923064	0.11734	0.0640718
1.165	0.0130294	0.00857791	0.124842		1.165	0.0345618	0.287673	0.00625212		1.165	0.424194	0.0796771	-0.0348869		1.165	-0.0248084	0.109712	0.129519		1.165	0.011904	0.0445902	0.0404137		1.165	0.0795521	0.109687	0.079377
1.166	0.0194066	0.0213323	0.135046		1.166	0.0269091	0.278745	-0.0026759		1.166	0.445877	0.0720245	-0.0425395		1.166	0.00197567	0.107161	0.116765		1.166	0.0195566	0.0535182	0.0391383		1.166	0.0808275	0.113514	0.0717244
1.167	0.0219575	0.0302603	0.136321		1.167	0.0307355	0.281296	0.0126293		1.167	0.42802	0.0758508	-0.0246834		1.167	-0.0082278	0.119916	0.148651		1.167	0.0208321	0.0484165	0.0493418		1.167	0.061696	0.0943821	0.0806524
1.168	0.0359872	0.026434	0.149076		1.168	0.0307355	0.297876	0.0100784		1.168	0.44205	0.0873297	-0.0170308		1.168	0.00962827	0.137772	0.158854		1.168	0.0106286	0.0369376	0.0506172		1.168	0.0655223	0.127543	0.079377
1.169	0.0168557	0.0226077	0.141423		1.169	0.0141548	0.310631	0.00497669		1.169	0.440775	0.0962578	-0.0297851		1.169	0.0121791	0.117365	0.158854		1.169	0.0361373	0.0331113	0.0378629		1.169	0.0833784	0.123717	0.10361
1.17	0.0245083	0.0149551	0.149076		1.17	0.0230828	0.30808	0.00497669		1.17	0.443326	0.102635	-0.0297851		1.17	0.0109037	0.153077	0.171608		1.17	0.0399636	0.0178061	0.0404137		1.17	0.0961327	0.114789	0.0895805
1.171	0.0347118	0.0251585	0.165656		1.171	0.0179811	0.291499	0.00752756		1.171	0.452254	0.0860543	-0.0195817		1.171	0.00835284	0.150526	0.172884		1.171	0.0272093	0.0318358	0.0455155		1.171	0.0808275	0.118615	0.0895805
1.172	0.0283346	0.0136796	0.179686		1.172	0.0345618	0.300427	0.0151802		1.172	0.452254	0.0886052	-0.0106536		1.172	0.0262089	0.137772	0.169057		1.172	0.0259338	0.0241832	0.0569944		1.172	0.0821029	0.128819	0.0972331
1.173	0.0385381	0.0315357	0.160555		1.173	0.0320109	0.311906	0.00242582		1.173	0.448427	0.0937069	-0.0297851		1.173	0.0287598	0.153077	0.195842		1.173	0.0297601	0.0190815	0.0480664		1.173	0.0667977	0.109687	0.11764
1.174	0.0270592	0.0379129	0.173309		1.174	0.02946	0.310631	0.00115039		1.174	0.440775	0.0949823	-0.0017256		1.174	0.0338615	0.165831	0.20477		1.174	0.0361373	0.0280095	0.0480664		1.174	0.0718995	0.142849	0.111263
1.175	0.0334364	0.0328111	0.169483		1.175	0.0307355	0.309355	0.0202819		1.175	0.445877	0.116665	-0.0004502		1.175	0.0351369	0.17731	0.181812		1.175	0.0399636	0.0254587	0.035312		1.175	0.0974081	0.124993	0.126568
1.176	0.0143049	0.026434	0.179686		1.176	0.0371126	0.306804	0.0266591		1.176	0.454805	0.138347	-0.0119291		1.176	0.0427896	0.165831	0.197117		1.176	0.0527179	0.038213	0.04424		1.176	0.0923064	0.139022	0.139322
1.177	0.0308855	0.0430146	0.179686		1.177	0.0167057	0.302978	0.0151802		1.177	0.439499	0.124317	0.0110288		1.177	0.0351369	0.186238	0.207321		1.177	0.0488916	0.0433147	0.0506172		1.177	0.0884801	0.137747	0.139322
1.178	0.058945	0.0455655	0.205195		1.178	0.0409389	0.30808	0.0164556		1.178	0.459906	0.0988086	-0.0081028		1.178	0.0542685	0.172209	0.203494		1.178	0.0565442	0.0101535	0.0518926		1.178	0.0846538	0.126268	0.143149
1.179	0.0423644	0.035362	0.214123		1.179	0.0447652	0.300427	0.0164556		1.179	0.459906	0.121766	0.00975331		1.179	0.0478913	0.176035	0.213698		1.179	0.0463408	0.0178061	0.0493418		1.179	0.0884801	0.139022	0.143149
1.18	0.0308855	0.0391883	0.201369		1.18	0.0422143	0.318283	0.0253836		1.18	0.475212	0.123042	-0.0068273		1.18	0.0657473	0.190065	0.212422		1.18	0.0603705	0.0165306	0.0429646		1.18	0.0948573	0.145399	0.177585
1.181	0.050017	0.0391883	0.207746		1.181	0.0524178	0.309355	0.0215573		1.181	0.463733	0.143449	0.00592701		1.181	0.0568193	0.179861	0.214973		1.181	0.0361373	0.0280095	0.0302103		1.181	0.0859292	0.144124	0.157178
1.182	0.0436398	0.0493918	0.201369		1.182	0.0447652	0.319559	0.0126293		1.182	0.472661	0.144724	0.0174059		1.182	0.0504421	0.188789	0.218799		1.182	0.0565442	0.0254587	0.0544435		1.182	0.0974081	0.118615	0.171208
1.183	0.0398135	0.0455655	0.212847		1.183	0.0307355	0.318283	0.0202819		1.183	0.463733	0.135796	0.0225077		1.183	0.0708491	0.197717	0.234105		1.183	0.0667477	0.0280095	0.055719		1.183	0.0821029	0.13137	0.16228
1.184	0.0474661	0.0315357	0.225602		1.184	0.0536933	0.309355	0.0190065		1.184	0.466284	0.144724	0.00720245		1.184	0.0376878	0.19134	0.218799		1.184	0.0629214	0.0203569	0.035312		1.184	0.0884801	0.146675	0.183963
1.185	0.0512924	0.0519427	0.225602		1.185	0.0600705	0.305529	0.0355871		1.185	0.473936	0.128144	0.0186813		1.185	0.0580947	0.198993	0.209871		1.185	0.0425145	0.0331113	0.0531681		1.185	0.0935818	0.145399	0.205645
1.186	0.050017	0.0442901	0.23453		1.186	0.0600705	0.311906	0.0279345		1.186	0.482864	0.140898	0.0288848		1.186	0.0478913	0.207921	0.216249		1.186	0.0539934	0.0331113	0.0620961		1.186	0.0986836	0.145399	0.20437
1.187	0.0449153	0.0595953	0.224326		1.187	0.0600705	0.30808	0.0279345		1.187	0.475212	0.134521	0.0276094		1.187	0.0682982	0.195166	0.22135		1.187	0.0578197	0.0241832	0.0569944		1.187	0.0948573	0.133921	0.20437
1.188	0.0436398	0.0493918	0.239632		1.188	0.0613459	0.30808	0.0279345		1.188	0.48414	0.153652	0.0365374		1.188	0.0542685	0.209196	0.223901		1.188	0.0641968	0.0178061	0.0582698		1.188	0.105061	0.136471	0.218399
1.189	0.0525679	0.0404638	0.240907		1.189	0.0766511	0.292775	0.0190065		1.189	0.50072	0.143449	0.0327111		1.189	0.0670228	0.2194	0.23538		1.189	0.0463408	0.00632718	0.0340366		1.189	0.091031	0.136471	0.231154
1.19	0.0551187	0.0468409	0.226877		1.19	0.0689985	0.315732	0.0330362		1.19	0.491792	0.161305	0.0327111		1.19	0.0772262	0.233429	0.243033		1.19	0.061646	0.0114289	0.0467909		1.19	0.0821029	0.146675	0.242633
1.191	0.0487416	0.0379129	0.261314		1.191	0.0677231	0.313182	0.0292099		1.191	0.505822	0.160029	0.0212322		1.191	0.0746754	0.239807	0.226452		1.191	0.061646	0.00632718	0.0531681		1.191	0.091031	0.146675	0.231154
1.192	0.0398135	0.0544935	0.268966		1.192	0.0715494	0.313182	0.0547186		1.192	0.507097	0.167682	0.0378129		1.192	0.0848788	0.225777	0.230278		1.192	0.0667477	0.0216324	0.0480664		1.192	0.101234	0.139022	0.242633
1.193	0.0640468	0.0532181	0.272793		1.193	0.0664476	0.325936	0.0394134		1.193	0.521127	0.165131	0.0378129		1.193	0.0950823	0.232154	0.237931		1.193	0.0590951	0.0165306	0.0569944		1.193	0.0923064	0.14795	0.24901
1.194	0.058945	0.0417392	0.254937		1.194	0.0906809	0.32466	0.0572695		1.194	0.513475	0.154928	0.0480163		1.194	0.0989086	0.239807	0.220075		1.194	0.0641968	0.0114289	0.0569944		1.194	0.0948573	0.139022	0.254111
1.195	0.058945	0.0430146	0.275344		1.195	0.0779265	0.329762	0.0521678		1.195	0.510924	0.181712	0.0543935		1.195	0.120591	0.229603	0.229003		1.195	0.0527179	0.0178061	0.0569944		1.195	0.121641	0.146675	0.274518
1.196	0.0640468	0.0442901	0.282996		1.196	0.0919563	0.318283	0.0496169		1.196	0.526229	0.168957	0.0467409		1.196	0.153752	0.233429	0.23538		1.196	0.0603705	0.0267341	0.0455155		1.196	0.115264	0.149226	0.289824
1.197	0.0602205	0.0455655	0.270242		1.197	0.0957826	0.304253	0.0483414		1.197	0.541534	0.177885	0.0454654		1.197	0.167782	0.241082	0.236655		1.197	0.0641968	0.0241832	0.0620961		1.197	0.107612	0.151777	0.289824
1.198	0.0461907	0.0519427	0.290649		1.198	0.103435	0.332313	0.0572695		1.198	0.547911	0.177885	0.0416391		1.198	0.189464	0.256387	0.223901		1.198	0.0718494	0.0127043	0.0391383		1.198	0.122917	0.158154	0.30768
1.199	0.0525679	0.0532181	0.267691		1.199	0.100884	0.334864	0.047066		1.199	0.535157	0.184263	0.0492918		1.199	0.209871	0.258938	0.251961		1.199	0.0450653	0.00632718	0.04424		1.199	0.11909	0.141573	0.311506
1.2	0.0449153	0.0583198	0.297026		1.2	0.104711	0.319559	0.0598204		1.2	0.537708	0.174059	0.0684233		1.2	0.199668	0.262764	0.23538		1.2	0.0654723	0.0152552	0.0416892		1.2	0.136947	0.156878	0.331913
1.201	0.0742503	0.0379129	0.285547		1.201	0.10216	0.332313	0.0649221		1.201	0.549187	0.180436	0.0339865		1.201	0.236655	0.266591	0.244308		1.201	0.0680231	0.0114289	0.0480664		1.201	0.145875	0.163256	0.343392
1.202	0.0742503	0.0493918	0.291924		1.202	0.109812	0.318283	0.0789519		1.202	0.547911	0.185538	0.0505672		1.202	0.232829	0.256387	0.241757		1.202	0.0501671	0.0216324	0.0365874		1.202	0.144599	0.16198	0.334464
1.203	0.0716994	0.0340866	0.2932		1.203	0.123842	0.329762	0.0917062		1.203	0.551738	0.191915	0.055669		1.203	0.234105	0.270417	0.220075		1.203	0.0718494	0.0254587	0.0404137		1.203	0.156078	0.172184	0.357422
1.204	0.0691485	0.0455655	0.294475		1.204	0.11874	0.329762	0.0904308		1.204	0.563216	0.177885	0.0378129		1.204	0.248134	0.272968	0.227727		1.204	0.0527179	0.0152552	0.0365874		1.204	0.167557	0.160705	0.356146
1.205	0.0538433	0.0455655	0.2932		1.205	0.128944	0.337415	0.085329		1.205	0.556839	0.189364	0.0505672		1.205	0.236655	0.284447	0.232829		1.205	0.0654723	0.0127043	0.0378629		1.205	0.173934	0.179836	0.348494
1.206	0.0576696	0.0442901	0.308505		1.206	0.127668	0.345067	0.108287		1.206	0.556839	0.188089	0.0403637		1.206	0.253236	0.276794	0.257062		1.206	0.0539934	0.00760258	0.0327611		1.206	0.156078	0.159429	0.38293
1.207	0.0704239	0.0519427	0.289373		1.207	0.122567	0.332313	0.140173		1.207	0.567043	0.180436	0.0569444		1.207	0.257062	0.275519	0.229003		1.207	0.0871546	0.0114289	0.04424		1.207	0.157353	0.186213	0.384206
1.208	0.0436398	0.0455655	0.308505		1.208	0.128944	0.341241	0.114664		1.208	0.560666	0.184263	0.0684233		1.208	0.239206	0.290824	0.258338		1.208	0.0501671	0.0127043	0.0289348		1.208	0.171383	0.181112	0.389307
1.209	0.0461907	0.0289848	0.311056		1.209	0.144249	0.32211	0.119766		1.209	0.549187	0.182987	0.0569444		1.209	0.246859	0.306129	0.262164		1.209	0.0514425	0.0203569	0.0378629		1.209	0.189239	0.184938	0.41099
1.21	0.0551187	0.0455655	0.291924		1.21	0.125118	0.331038	0.137622		1.21	0.593827	0.181712	0.0569444		1.21	0.244308	0.298477	0.255787		1.21	0.0514425	0.0241832	0.0467909		1.21	0.189239	0.188764	0.417367
1.211	0.0640468	0.035362	0.295751		1.211	0.128944	0.333588	0.14655		1.211	0.588725	0.198292	0.0531181		1.211	0.236655	0.295926	0.276194		1.211	0.0578197	0.0331113	0.0404137		1.211	0.20582	0.214273	0.423744
1.212	0.0436398	0.0328111	0.299577		1.212	0.116189	0.320834	0.155478		1.212	0.581073	0.199568	0.0696987		1.212	0.239206	0.29465	0.283847		1.212	0.0718494	0.0152552	0.0302103		1.212	0.199443	0.198968	0.42757
1.213	0.0691485	0.0391883	0.295751		1.213	0.148075	0.332313	0.159304		1.213	0.590001	0.195742	0.0722496		1.213	0.234105	0.318883	0.283847		1.213	0.0667477	0.0114289	0.0314857		1.213	0.20582	0.184938	0.428846
1.214	0.0538433	0.0340866	0.276619		1.214	0.135321	0.327211	0.16058		1.214	0.577246	0.181712	0.055669		1.214	0.232829	0.30868	0.300427		1.214	0.0539934	0.0229078	0.0238331		1.214	0.207095	0.205345	0.442876
1.215	0.050017	0.035362	0.297026		1.215	0.137872	0.336139	0.16313		1.215	0.597653	0.184263	0.0620461		1.215	0.243033	0.323985	0.305529		1.215	0.0552688	0.0127043	0.0467909		1.215	0.230053	0.201519	0.463282
1.216	0.0538433	0.0328111	0.302128		1.216	0.150626	0.346343	0.178436		1.216	0.598929	0.193191	0.0582198		1.216	0.239206	0.315057	0.300427		1.216	0.0654723	0.0165306	0.0467909		1.216	0.214748	0.200243	0.470935
1.217	0.0525679	0.0442901	0.295751		1.217	0.136596	0.33869	0.184813		1.217	0.57342	0.203394	0.0748005		1.217	0.240482	0.329087	0.306804		1.217	0.0552688	0.0101535	0.0378629		1.217	0.20582	0.196417	0.483689
1.218	0.0525679	0.0506672	0.298301		1.218	0.135321	0.328487	0.17716		1.218	0.60403	0.209771	0.0773513		1.218	0.227727	0.348218	0.328487		1.218	0.070574	0.0216324	0.0302103		1.218	0.204545	0.210447	0.473486
1.219	0.058945	0.0430146	0.27917		1.219	0.141698	0.356546	0.189915		1.219	0.602755	0.185538	0.0594953		1.219	0.234105	0.335464	0.346343		1.219	0.0603705	0.0203569	0.0238331		1.219	0.228778	0.225752	0.473486
1.22	0.058945	0.035362	0.27917		1.22	0.149351	0.329762	0.198843		1.22	0.602755	0.197017	0.0901057		1.22	0.216249	0.344392	0.331038		1.22	0.0629214	0.00760258	0.0212822		1.22	0.217299	0.216824	0.501545
1.221	0.0653222	0.0391883	0.288098		1.221	0.139147	0.342516	0.203944		1.221	0.597653	0.188089	0.0773513		1.221	0.218799	0.340566	0.342516		1.221	0.0578197	0.00250088	0.0391383		1.221	0.214748	0.216824	0.52833
1.222	0.0436398	0.0340866	0.299577		1.222	0.136596	0.33869	0.202669		1.222	0.60403	0.209771	0.0786268		1.222	0.207321	0.358422	0.368025		1.222	0.061646	0.0267341	0.0212822		1.222	0.214748	0.207896	0.519402
1.223	0.0423644	0.035362	0.295751		1.223	0.154452	0.342516	0.214148		1.223	0.611683	0.208496	0.0977583		1.223	0.198392	0.36735	0.379504		1.223	0.0527179	0.0190815	0.0289348		1.223	0.227502	0.215548	0.507923
1.224	0.0359872	0.0302603	0.297026		1.224	0.157003	0.345067	0.212872		1.224	0.623162	0.185538	0.101585		1.224	0.194566	0.366075	0.376953		1.224	0.0565442	0.00122538	0.0493418		1.224	0.210922	0.216824	0.524503
1.225	0.0474661	0.0302603	0.281721		1.225	0.157003	0.347618	0.21925		1.225	0.606581	0.200843	0.0811776		1.225	0.193291	0.341841	0.410114		1.225	0.061646	0.0127043	0.0340366		1.225	0.210922	0.214273	0.518126
1.226	0.0512924	0.0315357	0.270242		1.226	0.155728	0.345067	0.209046		1.226	0.610408	0.208496	0.0977583		1.226	0.184363	0.362248	0.399911		1.226	0.0565442	0.00760258	0.035312		1.226	0.208371	0.20662	0.53088
1.227	0.0359872	0.0340866	0.284272		1.227	0.150626	0.359097	0.224351		1.227	0.610408	0.199568	0.105411		1.227	0.169057	0.366075	0.415216		1.227	0.0514425	0.0101535	0.0455155		1.227	0.224951	0.221926	0.548737
1.228	0.0525679	0.0455655	0.282996		1.228	0.153177	0.357822	0.223076		1.228	0.614234	0.217424	0.110513		1.228	0.165231	0.354596	0.412665		1.228	0.0578197	0.0369376	0.0582698		1.228	0.230053	0.201519	0.555114
1.229	0.0461907	0.0468409	0.271517		1.229	0.159554	0.343792	0.210321		1.229	0.607857	0.20722	0.0875548		1.229	0.177986	0.369901	0.431797		1.229	0.0692986	0.0216324	0.055719		1.229	0.217299	0.198968	0.556389
1.23	0.0423644	0.0302603	0.288098		1.23	0.154452	0.376953	0.211597		1.23	0.615509	0.223801	0.0888302		1.23	0.165231	0.377553	0.433072		1.23	0.0578197	0.0216324	0.0531681		1.23	0.214748	0.228303	0.566593
1.231	0.0359872	0.0468409	0.288098		1.231	0.151902	0.368025	0.215423		1.231	0.619336	0.200843	0.0862794		1.231	0.160129	0.378829	0.448377		1.231	0.0692986	0.00122538	0.0684733		1.231	0.226227	0.229578	0.560215
1.232	0.041089	0.0379129	0.276619		1.232	0.142974	0.356546	0.215423		1.232	0.610408	0.194466	0.109237		1.232	0.144824	0.382655	0.448377		1.232	0.0654723	0.00887798	0.0659224		1.232	0.201994	0.211722	0.55894
1.233	0.058945	0.0277094	0.282996		1.233	0.16083	0.350169	0.198843		1.233	0.612958	0.205945	0.0901057		1.233	0.147375	0.363524	0.472611		1.233	0.0590951	0.0190815	0.0748504		1.233	0.204545	0.205345	0.584449
1.234	0.0461907	0.0302603	0.268966		1.234	0.171033	0.378229	0.201393		1.234	0.624437	0.20722	0.093932		1.234	0.152477	0.385206	0.476437		1.234	0.061646	-0.0026009	0.0799522		1.234	0.226227	0.212997	0.569144
1.235	0.0525679	0.0328111	0.284272		1.235	0.168482	0.438174	0.215423		1.235	0.634641	0.231454	0.0799022		1.235	0.138447	0.369901	0.472611		1.235	0.0501671	0.0114289	0.0633715		1.235	0.224951	0.209171	0.583173
1.236	0.0487416	0.0340866	0.281721		1.236	0.183787	0.464958	0.202669		1.236	0.628264	0.209771	0.0901057		1.236	0.129519	0.378829	0.496844		1.236	0.0641968	-0.0026009	0.0774013		1.236	0.210922	0.198968	0.587
1.237	0.0398135	0.0532181	0.274068		1.237	0.178686	0.461132	0.19119		1.237	0.625713	0.202119	0.0837285		1.237	0.135896	0.394134	0.485365		1.237	0.0463408	0.00887798	0.0633715		1.237	0.207095	0.205345	0.581898
1.238	0.0385381	0.026434	0.262589		1.238	0.172309	0.420318	0.203944		1.238	0.639742	0.213598	0.0824531		1.238	0.133345	0.372452	0.498119		1.238	0.0450653	-5.002e-05	0.0748504		1.238	0.200718	0.204069	0.590826
1.239	0.0385381	0.0251585	0.2932		1.239	0.192716	0.406288	0.215423		1.239	0.61806	0.202119	0.101585		1.239	0.137172	0.382655	0.507047		1.239	0.0807775	0.0203569	0.0965328		1.239	0.185413	0.192591	0.571694
1.24	0.0347118	0.0442901	0.289373		1.24	0.176135	0.389708	0.187364		1.24	0.625713	0.222526	0.0952074		1.24	0.138447	0.383931	0.490467		1.24	0.0501671	0.0114289	0.0799522		1.24	0.198167	0.202794	0.594652
1.241	0.0512924	0.0315357	0.272793		1.241	0.204194	0.368025	0.195016		1.241	0.630814	0.23528	0.100309		1.241	0.144824	0.383931	0.505772		1.241	0.0641968	0.00377628	0.0901556		1.241	0.203269	0.19004	0.602305
1.242	0.041089	0.0238831	0.257488		1.242	0.192716	0.380779	0.193741		1.242	0.630814	0.212322	0.0811776		1.242	0.1461	0.389032	0.521077		1.242	0.0641968	0.0101535	0.0748504		1.242	0.216023	0.205345	0.629089
1.243	0.0385381	0.035362	0.261314		1.243	0.176135	0.378229	0.17716		1.243	0.63209	0.226352	0.0837285		1.243	0.151201	0.386481	0.518526		1.243	0.0463408	0.0241832	0.0595453		1.243	0.186688	0.197692	0.623987
1.244	0.0512924	0.0187814	0.280445		1.244	0.185063	0.388432	0.197567		1.244	0.629539	0.212322	0.0901057		1.244	0.138447	0.385206	0.519802		1.244	0.0692986	0.00122538	0.0786767		1.244	0.198167	0.201519	0.643119
1.245	0.0653222	0.0404638	0.268966		1.245	0.176135	0.374402	0.197567		1.245	0.620611	0.213598	0.0837285		1.245	0.126968	0.400511	0.532556		1.245	0.0425145	0.0114289	0.0748504		1.245	0.196892	0.205345	0.620161
1.246	0.0398135	0.0366375	0.263865		1.246	0.200368	0.392258	0.169508		1.246	0.641018	0.216148	0.0748005		1.246	0.147375	0.394134	0.538933		1.246	0.0565442	0.0127043	0.0786767		1.246	0.193066	0.192591	0.627814
1.247	0.0423644	0.0391883	0.26514		1.247	0.204194	0.389708	0.182262		1.247	0.620611	0.217424	0.093932		1.247	0.172884	0.409439	0.532556		1.247	0.0565442	-0.0038763	0.0799522		1.247	0.193066	0.200243	0.632915
1.248	0.0334364	0.00347618	0.26514		1.248	0.20547	0.390983	0.182262		1.248	0.609132	0.236555	0.0977583		1.248	0.156303	0.396685	0.544035		1.248	0.0488916	0.00122538	0.0659224		1.248	0.195616	0.192591	0.635466
1.249	0.0474661	0.0417392	0.257488		1.249	0.224601	0.385881	0.159304		1.249	0.649946	0.223801	0.0964828		1.249	0.169057	0.395409	0.537658		1.249	0.0463408	0.0139798	0.082503		1.249	0.173934	0.188764	0.646945
1.25	0.0334364	0.0340866	0.257488		1.25	0.206745	0.394809	0.16058		1.25	0.633365	0.23528	0.10286		1.25	0.160129	0.414541	0.541484		1.25	0.0641968	0.00632718	0.0684733		1.25	0.196892	0.187489	0.640568
1.251	0.0449153	0.0532181	0.25111		1.251	0.208021	0.379504	0.152927		1.251	0.643569	0.218699	0.101585		1.251	0.152477	0.41199	0.546586		1.251	0.061646	0.00250088	0.0799522		1.251	0.179036	0.20662	0.646945
1.252	0.0525679	0.0379129	0.256212		1.252	0.214398	0.380779	0.159304		1.252	0.626988	0.227627	0.125818		1.252	0.161405	0.415816	0.554238		1.252	0.0514425	-0.0026009	0.064647		1.252	0.179036	0.193866	0.641843
1.253	0.0474661	0.0302603	0.26514		1.253	0.214398	0.380779	0.182262		1.253	0.610408	0.227627	0.139848		1.253	0.153752	0.415816	0.563166		1.253	0.0641968	0.00632718	0.0582698		1.253	0.190515	0.191315	0.640568
1.254	0.0449153	0.0417392	0.252386		1.254	0.227152	0.396085	0.16058		1.254	0.623162	0.212322	0.114339		1.254	0.170333	0.429846	0.550412		1.254	0.0527179	0.00632718	0.0748504		1.254	0.190515	0.173459	0.64567
1.255	0.0512924	0.0124042	0.261314		1.255	0.241182	0.38333	0.179711		1.255	0.619336	0.222526	0.107962		1.255	0.174159	0.420918	0.565717		1.255	0.0514425	0.0152552	0.0659224		1.255	0.186688	0.196417	0.653322
1.256	0.058945	0.0417392	0.261314		1.256	0.2195	0.385881	0.17716		1.256	0.615509	0.205945	0.13347		1.256	0.172884	0.434948	0.570819		1.256	0.0565442	0.0101535	0.0786767		1.256	0.168832	0.173459	0.666076
1.257	0.0398135	0.0493918	0.253661		1.257	0.229703	0.389708	0.151652		1.257	0.610408	0.23528	0.143674		1.257	0.177986	0.441325	0.555514		1.257	0.0450653	0.00122538	0.0850539		1.257	0.179036	0.163256	0.666076
1.258	0.0474661	0.0289848	0.257488		1.258	0.2195	0.401186	0.168232		1.258	0.619336	0.241657	0.137297		1.258	0.170333	0.463007	0.561891		1.258	0.061646	0.0114289	0.0786767		1.258	0.181587	0.177285	0.641843
1.259	0.0474661	0.0366375	0.254937		1.259	0.224601	0.398636	0.155478		1.259	0.634641	0.223801	0.150051		1.259	0.160129	0.443876	0.574645		1.259	0.0565442	0.00760258	0.0722996		1.259	0.180311	0.179836	0.672454
1.26	0.0487416	0.0213323	0.244733		1.26	0.234805	0.384606	0.168232		1.26	0.612958	0.240382	0.136021		1.26	0.181812	0.463007	0.556789		1.26	0.0654723	0.0127043	0.0595453		1.26	0.184138	0.178561	0.683933
1.261	0.0716994	0.0340866	0.240907		1.261	0.227152	0.402462	0.16313		1.261	0.624437	0.223801	0.141123		1.261	0.186914	0.448978	0.563166		1.261	0.0501671	-0.0038763	0.0774013		1.261	0.184138	0.191315	0.660975
1.262	0.0512924	0.0379129	0.249835		1.262	0.242457	0.385881	0.161855		1.262	0.634641	0.225077	0.153877		1.262	0.174159	0.445151	0.560616		1.262	0.0463408	0.0216324	0.0722996		1.262	0.193066	0.172184	0.663526
1.263	0.0551187	0.0391883	0.246009		1.263	0.233529	0.390983	0.158029		1.263	0.607857	0.216148	0.150051		1.263	0.180536	0.465558	0.577196		1.263	0.0603705	0.00887798	0.0633715		1.263	0.17776	0.17601	0.678831
1.264	0.0423644	0.0391883	0.252386		1.264	0.22205	0.387157	0.16313		1.264	0.615509	0.230178	0.151326		1.264	0.158854	0.478313	0.579747		1.264	0.0501671	0.0216324	0.064647		1.264	0.163731	0.184938	0.668627
1.265	0.0398135	0.0468409	0.253661		1.265	0.245008	0.392258	0.16058		1.265	0.620611	0.236555	0.146225		1.265	0.181812	0.478313	0.551688		1.265	0.0565442	0.0178061	0.073575		1.265	0.158629	0.177285	0.683933
1.266	0.0398135	0.0532181	0.252386		1.266	0.227152	0.398636	0.16313		1.266	0.61806	0.214873	0.174284		1.266	0.177986	0.496169	0.577196		1.266	0.0654723	0.0139798	0.0850539		1.266	0.163731	0.179836	0.672454
1.267	0.0563942	0.0570444	0.258763		1.267	0.230979	0.399911	0.158029		1.267	0.588725	0.22125	0.164081		1.267	0.185638	0.477037	0.589951		1.267	0.0654723	0.0178061	0.0748504		1.267	0.194341	0.170908	0.677555
1.268	0.0551187	0.0519427	0.249835		1.268	0.232254	0.38333	0.149101		1.268	0.597653	0.211047	0.16153		1.268	0.172884	0.478313	0.581023		1.268	0.0476162	0.0165306	0.0774013		1.268	0.182862	0.165806	0.668627
1.269	0.0385381	0.0315357	0.238356		1.269	0.234805	0.375678	0.151652		1.269	0.602755	0.222526	0.171733		1.269	0.184363	0.512749	0.582298		1.269	0.0488916	0.0178061	0.0774013		1.269	0.180311	0.17601	0.668627
1.27	0.0551187	0.0442901	0.247284		1.27	0.234805	0.384606	0.149101		1.27	0.598929	0.232729	0.146225		1.27	0.185638	0.49872	0.572095		1.27	0.0641968	0.0216324	0.0850539		1.27	0.162455	0.188764	0.663526
1.271	0.0627714	0.0315357	0.24856		1.271	0.229703	0.396085	0.149101		1.271	0.598929	0.228903	0.179386		1.271	0.180536	0.494893	0.569544		1.271	0.061646	0.0356621	0.0914311		1.271	0.179036	0.186213	0.669903
1.272	0.0512924	0.0442901	0.233254		1.272	0.229703	0.39736	0.143999		1.272	0.616785	0.23528	0.164081		1.272	0.188189	0.514025	0.591226		1.272	0.0565442	0.00632718	0.0888802		1.272	0.204545	0.192591	0.673729
1.273	0.0525679	0.0302603	0.254937		1.273	0.228428	0.390983	0.13252		1.273	0.593827	0.228903	0.158979		1.273	0.195842	0.517851	0.581023		1.273	0.0476162	0.0305604	0.0595453		1.273	0.184138	0.159429	0.682657
1.274	0.0563942	0.0570444	0.247284		1.274	0.202919	0.396085	0.152927		1.274	0.593827	0.22125	0.188314		1.274	0.192015	0.510199	0.582298		1.274	0.0680231	0.0356621	0.0722996		1.274	0.186688	0.181112	0.67628
1.275	0.0525679	0.0621461	0.246009		1.275	0.232254	0.388432	0.14655		1.275	0.586174	0.226352	0.188314		1.275	0.200943	0.521677	0.581023		1.275	0.061646	0.0229078	0.0850539		1.275	0.182862	0.191315	0.682657
1.276	0.041089	0.0455655	0.239632		1.276	0.220775	0.376953	0.140173		1.276	0.597653	0.225077	0.184488		1.276	0.181812	0.535707	0.57337		1.276	0.0603705	0.0241832	0.0939819		1.276	0.190515	0.173459	0.681382
1.277	0.0563942	0.0442901	0.261314		1.277	0.224601	0.382055	0.140173		1.277	0.597653	0.226352	0.203619		1.277	0.184363	0.534432	0.578472		1.277	0.0718494	0.0267341	0.0876048		1.277	0.182862	0.179836	0.675005
1.278	0.0704239	0.0442901	0.247284		1.278	0.234805	0.382055	0.133795		1.278	0.575971	0.232729	0.189589		1.278	0.199668	0.530605	0.577196		1.278	0.0769512	0.0241832	0.0774013		1.278	0.190515	0.184938	0.683933
1.279	0.0449153	0.0404638	0.242182		1.279	0.232254	0.384606	0.138897		1.279	0.592551	0.237831	0.185763		1.279	0.197117	0.540809	0.575921		1.279	0.0680231	0.0356621	0.101635		1.279	0.186688	0.183662	0.692861
1.28	0.0487416	0.0493918	0.247284		1.28	0.246284	0.387157	0.141448		1.28	0.584899	0.239106	0.187039		1.28	0.200943	0.551012	0.586124		1.28	0.0807775	0.0229078	0.104185		1.28	0.194341	0.173459	0.69031
1.281	0.0563942	0.0544935	0.246009		1.281	0.234805	0.38333	0.142723		1.281	0.582348	0.223801	0.183212		1.281	0.218799	0.545911	0.595052		1.281	0.0884301	0.0356621	0.0837785		1.281	0.184138	0.182387	0.701789
1.282	0.0665976	0.0608707	0.262589		1.282	0.225877	0.379504	0.133795		1.282	0.578522	0.213598	0.181937		1.282	0.211147	0.548462	0.584849		1.282	0.0361373	0.0305604	0.0952574		1.282	0.186688	0.182387	0.689034
1.283	0.0423644	0.0608707	0.24856		1.283	0.224601	0.378229	0.140173		1.283	0.592551	0.225077	0.199793		1.283	0.236655	0.566318	0.578472		1.283	0.0667477	0.0343867	0.0927065		1.283	0.199443	0.17601	0.708166
1.284	0.0627714	0.0404638	0.240907		1.284	0.234805	0.382055	0.145274		1.284	0.586174	0.217424	0.204895		1.284	0.237931	0.562491	0.57337		1.284	0.079502	0.029285	0.0888802		1.284	0.194341	0.177285	0.728573
1.285	0.050017	0.0430146	0.254937		1.285	0.242457	0.387157	0.137622		1.285	0.581073	0.230178	0.216374		1.285	0.251961	0.577797	0.582298		1.285	0.0578197	0.0369376	0.0927065		1.285	0.204545	0.172184	0.715818
1.286	0.0653222	0.0417392	0.249835		1.286	0.248835	0.376953	0.123592		1.286	0.570869	0.232729	0.184488		1.286	0.258338	0.571419	0.565717		1.286	0.0667477	0.0318358	0.0914311		1.286	0.20582	0.163256	0.717094
1.287	0.0487416	0.064697	0.244733		1.287	0.247559	0.394809	0.135071		1.287	0.583623	0.225077	0.193416		1.287	0.274918	0.567593	0.591226		1.287	0.0807775	0.0318358	0.0978082		1.287	0.200718	0.174734	0.729848
1.288	0.0449153	0.055769	0.244733		1.288	0.248835	0.39736	0.137622		1.288	0.582348	0.223801	0.19214		1.288	0.283847	0.588	0.581023		1.288	0.0680231	0.0152552	0.104185		1.288	0.217299	0.184938	0.717094
1.289	0.0780765	0.055769	0.235805		1.289	0.239907	0.375678	0.149101		1.289	0.577246	0.219975	0.213823		1.289	0.285122	0.588	0.5874		1.289	0.0782266	0.0369376	0.0990837		1.289	0.223676	0.186213	0.736225
1.29	0.0461907	0.0672479	0.242182		1.29	0.238631	0.36675	0.142723		1.29	0.567043	0.218699	0.208721		1.29	0.297876	0.589275	0.579747		1.29	0.0501671	0.0318358	0.105461		1.29	0.213473	0.186213	0.715818
1.291	0.0461907	0.0583198	0.242182		1.291	0.239907	0.361648	0.135071		1.291	0.581073	0.23528	0.212547		1.291	0.320834	0.585449	0.582298		1.291	0.0756757	0.0394884	0.100359		1.291	0.217299	0.172184	0.722195
1.292	0.0627714	0.0697987	0.231979		1.292	0.251385	0.382055	0.141448		1.292	0.592551	0.239106	0.222751		1.292	0.332313	0.609682	0.582298		1.292	0.0744003	0.038213	0.0952574		1.292	0.223676	0.17601	0.723471
1.293	0.0678731	0.0570444	0.235805		1.293	0.270517	0.385881	0.155478		1.293	0.572144	0.216148	0.2202		1.293	0.343792	0.577797	0.592501		1.293	0.0897055	0.0331113	0.100359		1.293	0.21985	0.183662	0.737501
1.294	0.0538433	0.0544935	0.230703		1.294	0.260313	0.387157	0.158029		1.294	0.579797	0.23528	0.209996		1.294	0.333588	0.608407	0.579747		1.294	0.0948072	0.0127043	0.106736		1.294	0.226227	0.182387	0.746429
1.295	0.0551187	0.0672479	0.26514		1.295	0.259038	0.379504	0.159304		1.295	0.569594	0.222526	0.229128		1.295	0.346343	0.608407	0.586124		1.295	0.079502	0.0458656	0.106736		1.295	0.270867	0.182387	0.743878
1.296	0.0602205	0.0583198	0.244733		1.296	0.260313	0.382055	0.168232		1.296	0.583623	0.241657	0.204895		1.296	0.365474	0.610958	0.593777		1.296	0.0744003	0.0445902	0.109287		1.296	0.245358	0.201519	0.738776
1.297	0.0729748	0.0889302	0.235805		1.297	0.267966	0.389708	0.150376		1.297	0.581073	0.248034	0.229128		1.297	0.361648	0.627538	0.583573		1.297	0.0807775	0.038213	0.104185		1.297	0.253011	0.191315	0.731124
1.298	0.0563942	0.0761759	0.247284		1.298	0.25011	0.394809	0.158029		1.298	0.593827	0.245483	0.23423		1.298	0.357822	0.612233	0.579747		1.298	0.0833283	0.0280095	0.110563		1.298	0.256837	0.201519	0.750255
1.299	0.0729748	0.0659724	0.230703		1.299	0.26414	0.385881	0.174609		1.299	0.582348	0.231454	0.209996		1.299	0.362923	0.609682	0.589951		1.299	0.0718494	0.0331113	0.120766		1.299	0.251736	0.205345	0.733675
1.3	0.0538433	0.0634216	0.235805		1.3	0.279445	0.384606	0.179711		1.3	0.581073	0.231454	0.215098		1.3	0.362923	0.613509	0.579747		1.3	0.0756757	0.0152552	0.114389		1.3	0.273418	0.212997	0.766836

## Sheet: Fig.2C
		EcYeeD	-	WT	-	C13A	E19A	K21A	E26A	D31A	E32A	D38A	C39A		Note
		EcYeeE	-	WT											Mean values were calculated from three independet measurements.
	ΔOD600	n1	0.1	0.54	0.04	0.05	0.81	0.68	0.72	0.71	1.03	0.67	0.05		Error bars represent standard deviations.
		n2	0.07	0.52	0.07	0.06	0.8	0.54	0.72	0.68	0.83	0.8	0.06
		n3	0.08	0.65	0.07	0.07	0.69	0.55	0.64	0.66	0.91	0.63	0.06

## Sheet: Fig.2D
m/z	Intensity (AU)
11200	45
11200.3	45
11200.7	45
11201	52
11201.3	47
11201.6	49
11202	63
11202.3	67
11202.6	67
11202.9	57
11203.3	64
11203.6	68
11203.9	64
11204.2	60
11204.5	59
11204.9	55
11205.2	47
11205.5	58
11205.8	60
11206.2	61
11206.5	55
11206.8	62
11207.1	59
11207.5	61
11207.8	64
11208.1	64
11208.4	64
11208.7	65
11209.1	62
11209.4	68
11209.7	69
11210	66
11210.4	70
11210.7	68
11211	64
11211.3	67
11211.7	77
11212	72
11212.3	68
11212.6	61
11212.9	69
11213.3	71
11213.6	82
11213.9	81
11214.2	78
11214.6	78
11214.9	82
11215.2	90
11215.5	85
11215.9	75
11216.2	79
11216.5	78
11216.8	78
11217.1	71
11217.5	75
11217.8	73
11218.1	80
11218.4	80
11218.8	74
11219.1	81
11219.4	77
11219.7	68
11220.1	81
11220.4	77
11220.7	80
11221	73
11221.4	65
11221.7	68
11222	62
11222.3	89
11222.6	74
11223	78
11223.3	74
11223.6	74
11223.9	68
11224.3	79
11224.6	67
11224.9	75
11225.2	64
11225.6	76
11225.9	69
11226.2	71
11226.5	78
11226.8	89
11227.2	93
11227.5	77
11227.8	87
11228.1	93
11228.5	91
11228.8	80
11229.1	95
11229.4	105
11229.8	88
11230.1	88
11230.4	94
11230.7	109
11231	100
11231.4	92
11231.7	91
11232	98
11232.3	92
11232.7	95
11233	91
11233.3	108
11233.6	102
11234	98
11234.3	105
11234.6	110
11234.9	108
11235.3	110
11235.6	129
11235.9	130
11236.2	121
11236.5	121
11236.9	137
11237.2	144
11237.5	141
11237.8	131
11238.2	154
11238.5	144
11238.8	168
11239.1	159
11239.5	158
11239.8	169
11240.1	176
11240.4	179
11240.8	207
11241.1	191
11241.4	198
11241.7	199
11242	206
11242.4	207
11242.7	220
11243	224
11243.3	215
11243.7	206
11244	211
11244.3	219
11244.6	216
11245	238
11245.3	222
11245.6	219
11245.9	223
11246.3	236
11246.6	225
11246.9	227
11247.2	208
11247.5	208
11247.9	228
11248.2	216
11248.5	218
11248.8	248
11249.2	252
11249.5	247
11249.8	235
11250.1	247
11250.5	227
11250.8	244
11251.1	236
11251.4	241
11251.8	240
11252.1	255
11252.4	246
11252.7	250
11253.1	259
11253.4	245
11253.7	261
11254	272
11254.3	260
11254.7	268
11255	256
11255.3	279
11255.6	266
11256	285
11256.3	279
11256.6	311
11256.9	318
11257.3	347
11257.6	318
11257.9	337
11258.2	331
11258.6	325
11258.9	356
11259.2	358
11259.5	373
11259.9	385
11260.2	403
11260.5	387
11260.8	387
11261.1	417
11261.5	444
11261.8	468
11262.1	466
11262.4	472
11262.8	454
11263.1	488
11263.4	476
11263.7	506
11264.1	498
11264.4	523
11264.7	551
11265	596
11265.4	620
11265.7	632
11266	664
11266.3	704
11266.7	734
11267	788
11267.3	821
11267.6	846
11267.9	890
11268.3	938
11268.6	946
11268.9	993
11269.2	1020
11269.6	1042
11269.9	1073
11270.2	1091
11270.5	1117
11270.9	1118
11271.2	1163
11271.5	1195
11271.8	1210
11272.2	1199
11272.5	1183
11272.8	1167
11273.1	1185
11273.5	1187
11273.8	1188
11274.1	1220
11274.4	1218
11274.8	1224
11275.1	1221
11275.4	1250
11275.7	1220
11276	1230
11276.4	1202
11276.7	1238
11277	1209
11277.3	1199
11277.7	1184
11278	1166
11278.3	1160
11278.6	1140
11279	1163
11279.3	1155
11279.6	1167
11279.9	1153
11280.3	1121
11280.6	1127
11280.9	1093
11281.2	1141
11281.6	1106
11281.9	1127
11282.2	1135
11282.5	1115
11282.9	1096
11283.2	1103
11283.5	1079
11283.8	1087
11284.2	1053
11284.5	1055
11284.8	1047
11285.1	1020
11285.4	1018
11285.8	1003
11286.1	986
11286.4	992
11286.7	1041
11287.1	1002
11287.4	1012
11287.7	1000
11288	1003
11288.4	1025
11288.7	994
11289	990
11289.3	1019
11289.7	1018
11290	1016
11290.3	1024
11290.6	1045
11291	1101
11291.3	1121
11291.6	1157
11291.9	1205
11292.3	1252
11292.6	1300
11292.9	1344
11293.2	1408
11293.6	1497
11293.9	1543
11294.2	1605
11294.5	1675
11294.9	1730
11295.2	1816
11295.5	1866
11295.8	1917
11296.1	1998
11296.5	2028
11296.8	2143
11297.1	2214
11297.4	2252
11297.8	2279
11298.1	2343
11298.4	2356
11298.7	2411
11299.1	2427
11299.4	2505
11299.7	2523
11300	2562
11300.4	2565
11300.7	2589
11301	2583
11301.3	2603
11301.7	2628
11302	2644
11302.3	2620
11302.6	2659
11303	2659
11303.3	2642
11303.6	2658
11303.9	2664
11304.3	2748
11304.6	2799
11304.9	2929
11305.2	3017
11305.6	3140
11305.9	3281
11306.2	3469
11306.5	3723
11306.9	3988
11307.2	4349
11307.5	4746
11307.8	5255
11308.2	5772
11308.5	6384
11308.8	7098
11309.1	7817
11309.4	8665
11309.8	9577
11310.1	10529
11310.4	11598
11310.7	12732
11311.1	13915
11311.4	15137
11311.7	16306
11312	17511
11312.4	18745
11312.7	19925
11313	21043
11313.3	22129
11313.7	23200
11314	24194
11314.3	25115
11314.6	25921
11315	26706
11315.3	27362
11315.6	27921
11315.9	28337
11316.3	28677
11316.6	28886
11316.9	29027
11317.2	29010
11317.6	28963
11317.9	28755
11318.2	28446
11318.5	28074
11318.9	27692
11319.2	27215
11319.5	26621
11319.8	25991
11320.2	25283
11320.5	24496
11320.8	23776
11321.1	23004
11321.5	22189
11321.8	21429
11322.1	20626
11322.4	19810
11322.8	19009
11323.1	18248
11323.4	17494
11323.7	16783
11324.1	16052
11324.4	15364
11324.7	14719
11325	14053
11325.4	13434
11325.7	12832
11326	12303
11326.3	11764
11326.7	11286
11327	10819
11327.3	10408
11327.6	9962
11328	9583
11328.3	9266
11328.6	8949
11328.9	8634
11329.3	8388
11329.6	8151
11329.9	7921
11330.2	7696
11330.6	7515
11330.9	7275
11331.2	7095
11331.5	6924
11331.9	6724
11332.2	6529
11332.5	6332
11332.8	6173
11333.2	6011
11333.5	5864
11333.8	5694
11334.1	5548
11334.5	5396
11334.8	5264
11335.1	5109
11335.4	5023
11335.8	4854
11336.1	4746
11336.4	4647
11336.7	4571
11337.1	4487
11337.4	4443
11337.7	4391
11338	4374
11338.4	4394
11338.7	4451
11339	4488
11339.3	4554
11339.7	4649
11340	4811
11340.3	4971
11340.6	5188
11341	5443
11341.3	5732
11341.6	6080
11341.9	6456
11342.3	6874
11342.6	7304
11342.9	7753
11343.2	8279
11343.6	8801
11343.9	9349
11344.2	9906
11344.5	10499
11344.9	11057
11345.2	11616
11345.5	12104
11345.8	12611
11346.2	13122
11346.5	13624
11346.8	14017
11347.1	14401
11347.5	14766
11347.8	15079
11348.1	15307
11348.4	15480
11348.8	15591
11349.1	15696
11349.4	15762
11349.7	15794
11350.1	15741
11350.4	15681
11350.7	15554
11351	15400
11351.4	15156
11351.7	14907
11352	14606
11352.3	14301
11352.7	13956
11353	13622
11353.3	13254
11353.6	12820
11354	12444
11354.3	12029
11354.6	11586
11354.9	11174
11355.3	10755
11355.6	10327
11355.9	9952
11356.2	9556
11356.6	9192
11356.9	8859
11357.2	8496
11357.5	8164
11357.9	7849
11358.2	7548
11358.5	7205
11358.8	6936
11359.2	6699
11359.5	6458
11359.8	6236
11360.1	6005
11360.5	5792
11360.8	5569
11361.1	5377
11361.4	5224
11361.8	5079
11362.1	4976
11362.4	4844
11362.7	4742
11363.1	4640
11363.4	4530
11363.7	4401
11364	4328
11364.4	4217
11364.7	4083
11365	4008
11365.3	3908
11365.7	3834
11366	3720
11366.3	3625
11366.6	3515
11367	3436
11367.3	3339
11367.6	3251
11367.9	3174
11368.3	3085
11368.6	3015
11368.9	2933
11369.2	2861
11369.6	2832
11369.9	2754
11370.2	2705
11370.5	2633
11370.9	2591
11371.2	2535
11371.5	2465
11371.8	2395
11372.2	2331
11372.5	2256
11372.8	2229
11373.1	2177
11373.5	2116
11373.8	2064
11374.1	2017
11374.4	1974
11374.8	1901
11375.1	1865
11375.4	1846
11375.8	1802
11376.1	1787
11376.4	1798
11376.7	1757
11377.1	1742
11377.4	1721
11377.7	1676
11378	1687
11378.4	1665
11378.7	1659
11379	1617
11379.3	1647
11379.7	1631
11380	1617
11380.3	1587
11380.6	1574
11381	1569
11381.3	1532
11381.6	1534
11381.9	1514
11382.3	1522
11382.6	1516
11382.9	1521
11383.2	1585
11383.6	1610
11383.9	1620
11384.2	1675
11384.5	1723
11384.9	1757
11385.2	1777
11385.5	1865
11385.8	1946
11386.2	2028
11386.5	2094
11386.8	2199
11387.1	2326
11387.5	2432
11387.8	2552
11388.1	2682
11388.4	2786
11388.8	2899
11389.1	3031
11389.4	3160
11389.7	3293
11390.1	3396
11390.4	3542
11390.7	3688
11391.1	3826
11391.4	3946
11391.7	4037
11392	4097
11392.4	4164
11392.7	4225
11393	4263
11393.3	4315
11393.7	4340
11394	4349
11394.3	4351
11394.6	4330
11395	4317
11395.3	4302
11395.6	4240
11395.9	4198
11396.3	4136
11396.6	4070
11396.9	3994
11397.2	3923
11397.6	3848
11397.9	3754
11398.2	3648
11398.5	3569
11398.9	3436
11399.2	3317
11399.5	3248
11399.8	3153
11400.2	3053
11400.5	2938
11400.8	2845
11401.2	2707
11401.5	2656
11401.8	2570
11402.1	2482
11402.5	2396
11402.8	2286
11403.1	2225
11403.4	2126
11403.8	2063
11404.1	2003
11404.4	1948
11404.7	1892
11405.1	1842
11405.4	1795
11405.7	1728
11406	1705
11406.4	1653
11406.7	1613
11407	1572
11407.3	1545
11407.7	1497
11408	1480
11408.3	1423
11408.6	1368
11409	1340
11409.3	1325
11409.6	1302
11410	1265
11410.3	1242
11410.6	1200
11410.9	1223
11411.3	1211
11411.6	1236
11411.9	1239
11412.2	1228
11412.6	1207
11412.9	1179
11413.2	1179
11413.5	1203
11413.9	1198
11414.2	1189
11414.5	1208
11414.8	1200
11415.2	1173
11415.5	1170
11415.8	1173
11416.1	1165
11416.5	1187
11416.8	1172
11417.1	1196
11417.4	1188
11417.8	1165
11418.1	1160
11418.4	1167
11418.8	1158
11419.1	1142
11419.4	1155
11419.7	1155
11420.1	1160
11420.4	1158
11420.7	1137
11421	1128
11421.4	1130
11421.7	1149
11422	1120
11422.3	1139
11422.7	1133
11423	1121
11423.3	1151
11423.6	1181
11424	1184
11424.3	1171
11424.6	1198
11425	1208
11425.3	1227
11425.6	1251
11425.9	1260
11426.3	1300
11426.6	1289
11426.9	1325
11427.2	1329
11427.6	1359
11427.9	1383
11428.2	1385
11428.5	1441
11428.9	1458
11429.2	1493
11429.5	1513
11429.8	1551
11430.2	1552
11430.5	1594
11430.8	1622
11431.1	1631
11431.5	1647
11431.8	1660
11432.1	1652
11432.5	1674
11432.8	1681
11433.1	1668
11433.4	1673
11433.8	1688
11434.1	1656
11434.4	1641
11434.7	1626
11435.1	1599
11435.4	1567
11435.7	1524
11436	1480
11436.4	1461
11436.7	1444
11437	1437
11437.3	1380
11437.7	1355
11438	1325
11438.3	1264
11438.7	1226
11439	1211
11439.3	1190
11439.6	1153
11440	1138
11440.3	1094
11440.6	1074
11440.9	1023
11441.3	1036
11441.6	998
11441.9	996
11442.2	1013
11442.6	978
11442.9	987
11443.2	972
11443.6	971
11443.9	938
11444.2	918
11444.5	929
11444.9	905
11445.2	897
11445.5	911
11445.8	913
11446.2	877
11446.5	883
11446.8	867
11447.1	844
11447.5	823
11447.8	813
11448.1	826
11448.4	832
11448.8	818
11449.1	830
11449.4	817
11449.8	806
11450.1	821
11450.4	835
11450.7	831
11451.1	834
11451.4	798
11451.7	798
11452	791
11452.4	781
11452.7	769
11453	783
11453.3	773
11453.7	749
11454	759
11454.3	753
11454.7	736
11455	733
11455.3	745
11455.6	743
11456	731
11456.3	745
11456.6	728
11456.9	759
11457.3	748
11457.6	756
11457.9	741
11458.2	754
11458.6	754
11458.9	764
11459.2	781
11459.6	794
11459.9	791
11460.2	781
11460.5	785
11460.9	787
11461.2	782
11461.5	779
11461.8	808
11462.2	815
11462.5	811
11462.8	827
11463.1	837
11463.5	853
11463.8	840
11464.1	855
11464.5	812
11464.8	822
11465.1	809
11465.4	810
11465.8	824
11466.1	799
11466.4	800
11466.7	807
11467.1	816
11467.4	798
11467.7	776
11468	780
11468.4	781
11468.7	765
11469	755
11469.4	764
11469.7	749
11470	751
11470.3	743
11470.7	763
11471	763
11471.3	755
11471.6	739
11472	718
11472.3	722
11472.6	739
11473	738
11473.3	734
11473.6	725
11473.9	740
11474.3	730
11474.6	718
11474.9	745
11475.2	731
11475.6	744
11475.9	752
11476.2	743
11476.5	740
11476.9	730
11477.2	734
11477.5	730
11477.9	716
11478.2	707
11478.5	709
11478.8	704
11479.2	696
11479.5	709
11479.8	718
11480.1	729
11480.5	743
11480.8	705
11481.1	727
11481.5	749
11481.8	722
11482.1	748
11482.4	725
11482.8	739
11483.1	746
11483.4	740
11483.7	741
11484.1	729
11484.4	741
11484.7	738
11485	731
11485.4	747
11485.7	744
11486	741
11486.4	729
11486.7	765
11487	763
11487.3	756
11487.7	762
11488	752
11488.3	761
11488.6	762
11489	770
11489.3	757
11489.6	802
11490	794
11490.3	830
11490.6	848
11490.9	888
11491.3	896
11491.6	919
11491.9	943
11492.2	961
11492.6	1001
11492.9	1042
11493.2	1064
11493.6	1089
11493.9	1103
11494.2	1100
11494.5	1115
11494.9	1131
11495.2	1150
11495.5	1162
11495.8	1177
11496.2	1182
11496.5	1184
11496.8	1207
11497.2	1188
11497.5	1182
11497.8	1189
11498.1	1190
11498.5	1177
11498.8	1190
11499.1	1180
11499.4	1169
11499.8	1155

## Sheet: Fig.2E
	C17A, -thiosulfate			C17A, +thiosulfate
	m/z	Intensity (AU)		m/z	Intensity (AU)
	11200.1	95		11200.1	27
	11200.4	100		11200.4	24
	11200.8	98		11200.8	36
	11201.1	90		11201.1	32
	11201.4	104		11201.4	37
	11201.7	106		11201.7	35
	11202	100		11202	28
	11202.4	117		11202.4	27
	11202.7	107		11202.7	26
	11203	110		11203	33
	11203.3	119		11203.3	26
	11203.7	136		11203.7	29
	11204	136		11204	28
	11204.3	144		11204.3	37
	11204.6	146		11204.6	36
	11205	164		11205	34
	11205.3	150		11205.3	46
	11205.6	170		11205.6	54
	11205.9	188		11205.9	64
	11206.2	206		11206.2	69
	11206.6	203		11206.6	68
	11206.9	216		11206.9	64
	11207.2	222		11207.2	68
	11207.5	237		11207.5	77
	11207.9	243		11207.9	75
	11208.2	240		11208.2	81
	11208.5	244		11208.5	82
	11208.8	251		11208.8	85
	11209.2	251		11209.2	70
	11209.5	251		11209.5	79
	11209.8	261		11209.8	84
	11210.1	252		11210.1	77
	11210.4	249		11210.4	74
	11210.8	261		11210.8	80
	11211.1	250		11211.1	83
	11211.4	250		11211.4	77
	11211.7	262		11211.7	82
	11212.1	262		11212.1	74
	11212.4	265		11212.4	74
	11212.7	243		11212.7	73
	11213	248		11213	72
	11213.4	255		11213.4	71
	11213.7	249		11213.7	69
	11214	230		11214	77
	11214.3	234		11214.3	77
	11214.6	226		11214.6	80
	11215	223		11215	63
	11215.3	214		11215.3	52
	11215.6	203		11215.6	55
	11215.9	198		11215.9	59
	11216.3	192		11216.3	57
	11216.6	189		11216.6	66
	11216.9	185		11216.9	47
	11217.2	183		11217.2	55
	11217.6	203		11217.6	59
	11217.9	191		11217.9	69
	11218.2	200		11218.2	61
	11218.5	188		11218.5	63
	11218.8	193		11218.8	62
	11219.2	203		11219.2	55
	11219.5	202		11219.5	64
	11219.8	213		11219.8	64
	11220.1	222		11220.1	66
	11220.5	220		11220.5	70
	11220.8	230		11220.8	68
	11221.1	228		11221.1	83
	11221.4	253		11221.4	82
	11221.8	247		11221.8	81
	11222.1	240		11222.1	85
	11222.4	257		11222.4	88
	11222.7	250		11222.7	94
	11223.1	259		11223.1	92
	11223.4	276		11223.4	95
	11223.7	271		11223.7	111
	11224	286		11224	104
	11224.3	291		11224.3	103
	11224.7	284		11224.7	108
	11225	277		11225	106
	11225.3	290		11225.3	105
	11225.6	301		11225.6	107
	11226	293		11226	108
	11226.3	300		11226.3	101
	11226.6	301		11226.6	102
	11226.9	289		11226.9	106
	11227.3	299		11227.3	109
	11227.6	321		11227.6	94
	11227.9	315		11227.9	104
	11228.2	321		11228.2	98
	11228.5	330		11228.5	124
	11228.9	354		11228.9	115
	11229.2	341		11229.2	129
	11229.5	373		11229.5	122
	11229.8	374		11229.8	131
	11230.2	401		11230.2	130
	11230.5	427		11230.5	141
	11230.8	455		11230.8	142
	11231.1	490		11231.1	168
	11231.5	504		11231.5	188
	11231.8	545		11231.8	192
	11232.1	559		11232.1	214
	11232.4	601		11232.4	217
	11232.8	647		11232.8	226
	11233.1	662		11233.1	243
	11233.4	710		11233.4	255
	11233.7	788		11233.7	270
	11234	809		11234	291
	11234.4	859		11234.4	290
	11234.7	894		11234.7	323
	11235	919		11235	343
	11235.3	969		11235.3	379
	11235.7	1016		11235.7	401
	11236	1059		11236	419
	11236.3	1082		11236.3	407
	11236.6	1121		11236.6	427
	11237	1147		11237	443
	11237.3	1195		11237.3	437
	11237.6	1199		11237.6	459
	11237.9	1245		11237.9	485
	11238.3	1231		11238.3	473
	11238.6	1234		11238.6	489
	11238.9	1200		11238.9	486
	11239.2	1224		11239.2	480
	11239.5	1241		11239.5	481
	11239.9	1235		11239.9	492
	11240.2	1197		11240.2	510
	11240.5	1175		11240.5	515
	11240.8	1166		11240.8	494
	11241.2	1147		11241.2	502
	11241.5	1112		11241.5	488
	11241.8	1099		11241.8	467
	11242.1	1080		11242.1	456
	11242.5	1052		11242.5	445
	11242.8	1018		11242.8	446
	11243.1	997		11243.1	435
	11243.4	976		11243.4	422
	11243.8	933		11243.8	392
	11244.1	893		11244.1	384
	11244.4	861		11244.4	383
	11244.7	838		11244.7	369
	11245	808		11245	359
	11245.4	786		11245.4	368
	11245.7	786		11245.7	348
	11246	769		11246	342
	11246.3	750		11246.3	324
	11246.7	722		11246.7	322
	11247	746		11247	310
	11247.3	723		11247.3	301
	11247.6	710		11247.6	281
	11248	706		11248	285
	11248.3	702		11248.3	282
	11248.6	689		11248.6	263
	11248.9	674		11248.9	259
	11249.3	668		11249.3	244
	11249.6	676		11249.6	240
	11249.9	670		11249.9	257
	11250.2	668		11250.2	234
	11250.6	655		11250.6	230
	11250.9	619		11250.9	219
	11251.2	599		11251.2	225
	11251.5	605		11251.5	225
	11251.8	594		11251.8	216
	11252.2	603		11252.2	218
	11252.5	605		11252.5	217
	11252.8	601		11252.8	232
	11253.1	579		11253.1	222
	11253.5	573		11253.5	223
	11253.8	577		11253.8	223
	11254.1	557		11254.1	211
	11254.4	560		11254.4	204
	11254.8	542		11254.8	195
	11255.1	521		11255.1	193
	11255.4	513		11255.4	179
	11255.7	495		11255.7	176
	11256.1	508		11256.1	166
	11256.4	501		11256.4	174
	11256.7	502		11256.7	166
	11257	489		11257	187
	11257.4	508		11257.4	191
	11257.7	522		11257.7	197
	11258	578		11258	209
	11258.3	586		11258.3	215
	11258.6	599		11258.6	211
	11259	623		11259	217
	11259.3	644		11259.3	238
	11259.6	681		11259.6	224
	11259.9	721		11259.9	251
	11260.3	773		11260.3	273
	11260.6	819		11260.6	267
	11260.9	867		11260.9	291
	11261.2	932		11261.2	308
	11261.6	994		11261.6	343
	11261.9	1041		11261.9	383
	11262.2	1123		11262.2	394
	11262.5	1175		11262.5	422
	11262.9	1212		11262.9	454
	11263.2	1259		11263.2	473
	11263.5	1304		11263.5	494
	11263.8	1321		11263.8	519
	11264.2	1383		11264.2	537
	11264.5	1413		11264.5	565
	11264.8	1458		11264.8	591
	11265.1	1461		11265.1	610
	11265.4	1468		11265.4	584
	11265.8	1469		11265.8	610
	11266.1	1479		11266.1	593
	11266.4	1465		11266.4	588
	11266.7	1453		11266.7	579
	11267.1	1452		11267.1	591
	11267.4	1418		11267.4	595
	11267.7	1415		11267.7	597
	11268	1421		11268	568
	11268.4	1419		11268.4	574
	11268.7	1417		11268.7	573
	11269	1416		11269	570
	11269.3	1417		11269.3	549
	11269.7	1407		11269.7	558
	11270	1361		11270	554
	11270.3	1378		11270.3	547
	11270.6	1381		11270.6	561
	11271	1403		11271	557
	11271.3	1420		11271.3	553
	11271.6	1473		11271.6	571
	11271.9	1539		11271.9	599
	11272.3	1629		11272.3	642
	11272.6	1750		11272.6	704
	11272.9	1917		11272.9	727
	11273.2	2098		11273.2	830
	11273.6	2328		11273.6	891
	11273.9	2644		11273.9	1001
	11274.2	3046		11274.2	1148
	11274.5	3549		11274.5	1340
	11274.8	4084		11274.8	1532
	11275.2	4771		11275.2	1778
	11275.5	5540		11275.5	2111
	11275.8	6444		11275.8	2505
	11276.1	7454		11276.1	2911
	11276.5	8633		11276.5	3460
	11276.8	9947		11276.8	4061
	11277.1	11455		11277.1	4710
	11277.4	13089		11277.4	5505
	11277.8	14747		11277.8	6317
	11278.1	16520		11278.1	7255
	11278.4	18434		11278.4	8254
	11278.7	20469		11278.7	9299
	11279.1	22520		11279.1	10374
	11279.4	24491		11279.4	11450
	11279.7	26383		11279.7	12572
	11280	28256		11280	13720
	11280.4	30113		11280.4	14784
	11280.7	31749		11280.7	15845
	11281	33250		11281	16826
	11281.3	34542		11281.3	17679
	11281.7	35716		11281.7	18464
	11282	36657		11282	19164
	11282.3	37387		11282.3	19731
	11282.6	37894		11282.6	20210
	11283	38171		11283	20534
	11283.3	38268		11283.3	20701
	11283.6	38151		11283.6	20739
	11283.9	37889		11283.9	20645
	11284.2	37430		11284.2	20479
	11284.6	36809		11284.6	20212
	11284.9	36034		11284.9	19871
	11285.2	35128		11285.2	19459
	11285.5	34096		11285.5	18947
	11285.9	32998		11285.9	18374
	11286.2	31774		11286.2	17723
	11286.5	30506		11286.5	17008
	11286.8	29207		11286.8	16324
	11287.2	27888		11287.2	15559
	11287.5	26574		11287.5	14805
	11287.8	25223		11287.8	14093
	11288.1	23983		11288.1	13393
	11288.5	22721		11288.5	12682
	11288.8	21491		11288.8	11972
	11289.1	20303		11289.1	11294
	11289.4	19169		11289.4	10670
	11289.8	18047		11289.8	10052
	11290.1	16975		11290.1	9447
	11290.4	15970		11290.4	8857
	11290.7	15000		11290.7	8318
	11291.1	14101		11291.1	7792
	11291.4	13247		11291.4	7314
	11291.7	12487		11291.7	6862
	11292	11735		11292	6460
	11292.4	11129		11292.4	6081
	11292.7	10493		11292.7	5735
	11293	9919		11293	5399
	11293.3	9372		11293.3	5117
	11293.7	8901		11293.7	4813
	11294	8423		11294	4548
	11294.3	7978		11294.3	4312
	11294.6	7593		11294.6	4066
	11295	7206		11295	3857
	11295.3	6853		11295.3	3671
	11295.6	6542		11295.6	3456
	11295.9	6279		11295.9	3314
	11296.2	6004		11296.2	3151
	11296.6	5778		11296.6	3002
	11296.9	5529		11296.9	2884
	11297.2	5327		11297.2	2729
	11297.5	5133		11297.5	2638
	11297.9	4974		11297.9	2530
	11298.2	4792		11298.2	2388
	11298.5	4624		11298.5	2305
	11298.8	4474		11298.8	2244
	11299.2	4308		11299.2	2176
	11299.5	4152		11299.5	2088
	11299.8	4049		11299.8	2013
	11300.1	3904		11300.1	1939
	11300.5	3800		11300.5	1845
	11300.8	3673		11300.8	1798
	11301.1	3588		11301.1	1738
	11301.4	3474		11301.4	1678
	11301.8	3359		11301.8	1633
	11302.1	3271		11302.1	1568
	11302.4	3163		11302.4	1527
	11302.7	3083		11302.7	1506
	11303.1	2980		11303.1	1438
	11303.4	2885		11303.4	1399
	11303.7	2787		11303.7	1325
	11304	2692		11304	1245
	11304.4	2610		11304.4	1239
	11304.7	2515		11304.7	1176
	11305	2423		11305	1147
	11305.3	2347		11305.3	1091
	11305.7	2258		11305.7	1056
	11306	2169		11306	1022
	11306.3	2123		11306.3	984
	11306.6	2071		11306.6	942
	11307	2000		11307	906
	11307.3	1932		11307.3	878
	11307.6	1866		11307.6	841
	11307.9	1829		11307.9	825
	11308.3	1786		11308.3	791
	11308.6	1748		11308.6	777
	11308.9	1698		11308.9	747
	11309.2	1685		11309.2	725
	11309.6	1651		11309.6	693
	11309.9	1602		11309.9	657
	11310.2	1593		11310.2	655
	11310.5	1532		11310.5	646
	11310.9	1526		11310.9	640
	11311.2	1482		11311.2	625
	11311.5	1445		11311.5	615
	11311.8	1445		11311.8	636
	11312.1	1397		11312.1	598
	11312.5	1388		11312.5	588
	11312.8	1358		11312.8	601
	11313.1	1321		11313.1	563
	11313.4	1332		11313.4	573
	11313.8	1291		11313.8	578
	11314.1	1301		11314.1	566
	11314.4	1283		11314.4	576
	11314.7	1243		11314.7	555
	11315.1	1243		11315.1	553
	11315.4	1257		11315.4	560
	11315.7	1264		11315.7	565
	11316	1258		11316	556
	11316.4	1265		11316.4	555
	11316.7	1243		11316.7	572
	11317	1231		11317	566
	11317.3	1260		11317.3	544
	11317.7	1262		11317.7	538
	11318	1243		11318	539
	11318.3	1222		11318.3	526
	11318.6	1213		11318.6	486
	11319	1186		11319	507
	11319.3	1164		11319.3	493
	11319.6	1172		11319.6	495
	11319.9	1151		11319.9	488
	11320.3	1154		11320.3	485
	11320.6	1134		11320.6	471
	11320.9	1129		11320.9	470
	11321.2	1090		11321.2	445
	11321.6	1076		11321.6	449
	11321.9	1050		11321.9	430
	11322.2	1024		11322.2	396
	11322.5	1019		11322.5	386
	11322.9	1017		11322.9	364
	11323.2	983		11323.2	374
	11323.5	956		11323.5	372
	11323.8	949		11323.8	362
	11324.2	914		11324.2	355
	11324.5	892		11324.5	337
	11324.8	884		11324.8	334
	11325.1	876		11325.1	346
	11325.5	859		11325.5	332
	11325.8	850		11325.8	327
	11326.1	843		11326.1	306
	11326.4	810		11326.4	321
	11326.8	786		11326.8	307
	11327.1	770		11327.1	292
	11327.4	740		11327.4	268
	11327.7	744		11327.7	286
	11328.1	727		11328.1	281
	11328.4	702		11328.4	278
	11328.7	689		11328.7	270
	11329	708		11329	269
	11329.4	675		11329.4	269
	11329.7	664		11329.7	260
	11330	669		11330	259
	11330.3	662		11330.3	228
	11330.7	634		11330.7	240
	11331	611		11331	230
	11331.3	607		11331.3	215
	11331.6	605		11331.6	207
	11332	601		11332	196
	11332.3	574		11332.3	194
	11332.6	563		11332.6	195
	11332.9	557		11332.9	193
	11333.3	556		11333.3	190
	11333.6	548		11333.6	189
	11333.9	557		11333.9	187
	11334.2	536		11334.2	187
	11334.6	520		11334.6	198
	11334.9	511		11334.9	190
	11335.2	509		11335.2	181
	11335.5	504		11335.5	193
	11335.9	499		11335.9	201
	11336.2	503		11336.2	198
	11336.5	499		11336.5	188
	11336.8	496		11336.8	202
	11337.2	504		11337.2	186
	11337.5	500		11337.5	189
	11337.8	515		11337.8	180
	11338.1	518		11338.1	173
	11338.5	525		11338.5	167
	11338.8	545		11338.8	154
	11339.1	530		11339.1	149
	11339.4	546		11339.4	150
	11339.8	535		11339.8	154
	11340.1	525		11340.1	156
	11340.4	528		11340.4	167
	11340.7	506		11340.7	156
	11341.1	526		11341.1	159
	11341.4	507		11341.4	163
	11341.7	482		11341.7	163
	11342	481		11342	155
	11342.4	493		11342.4	163
	11342.7	491		11342.7	156
	11343	460		11343	163
	11343.3	469		11343.3	165
	11343.7	472		11343.7	161
	11344	457		11344	165
	11344.3	448		11344.3	175
	11344.6	454		11344.6	171
	11345	435		11345	156
	11345.3	421		11345.3	154
	11345.6	423		11345.6	147
	11345.9	416		11345.9	144
	11346.3	428		11346.3	146
	11346.6	441		11346.6	144
	11346.9	432		11346.9	135
	11347.2	432		11347.2	148
	11347.6	444		11347.6	157
	11347.9	432		11347.9	152
	11348.2	414		11348.2	153
	11348.5	435		11348.5	151
	11348.9	429		11348.9	145
	11349.2	434		11349.2	146
	11349.5	454		11349.5	157
	11349.8	446		11349.8	151
	11350.2	477		11350.2	161
	11350.5	474		11350.5	159
	11350.8	472		11350.8	169
	11351.1	475		11351.1	153
	11351.5	492		11351.5	149
	11351.8	489		11351.8	149
	11352.1	489		11352.1	147
	11352.4	492		11352.4	144
	11352.8	506		11352.8	141
	11353.1	485		11353.1	152
	11353.4	494		11353.4	150
	11353.7	499		11353.7	153
	11354.1	496		11354.1	165
	11354.4	496		11354.4	152
	11354.7	500		11354.7	147
	11355	481		11355	157
	11355.4	483		11355.4	152
	11355.7	458		11355.7	153
	11356	470		11356	156
	11356.3	465		11356.3	150
	11356.7	489		11356.7	140
	11357	460		11357	141
	11357.3	452		11357.3	150
	11357.6	459		11357.6	147
	11358	443		11358	154
	11358.3	441		11358.3	142
	11358.6	431		11358.6	141
	11358.9	429		11358.9	139
	11359.3	411		11359.3	134
	11359.6	392		11359.6	124
	11359.9	380		11359.9	131
	11360.2	382		11360.2	114
	11360.6	381		11360.6	125
	11360.9	359		11360.9	129
	11361.2	347		11361.2	132
	11361.5	356		11361.5	119
	11361.9	343		11361.9	117
	11362.2	336		11362.2	126
	11362.5	321		11362.5	141
	11362.8	312		11362.8	121
	11363.2	316		11363.2	131
	11363.5	317		11363.5	123
	11363.8	321		11363.8	120
	11364.2	335		11364.2	111
	11364.5	331		11364.5	112
	11364.8	325		11364.8	110
	11365.1	319		11365.1	96
	11365.5	341		11365.5	97
	11365.8	338		11365.8	92
	11366.1	330		11366.1	92
	11366.4	298		11366.4	82
	11366.8	306		11366.8	84
	11367.1	307		11367.1	89
	11367.4	318		11367.4	88
	11367.7	315		11367.7	97
	11368.1	324		11368.1	97
	11368.4	311		11368.4	91
	11368.7	311		11368.7	90
	11369	289		11369	88
	11369.4	285		11369.4	84
	11369.7	279		11369.7	93
	11370	290		11370	91
	11370.3	294		11370.3	85
	11370.7	296		11370.7	91
	11371	317		11371	92
	11371.3	317		11371.3	92
	11371.6	303		11371.6	85
	11372	306		11372	94
	11372.3	318		11372.3	93
	11372.6	342		11372.6	95
	11372.9	342		11372.9	92
	11373.3	335		11373.3	98
	11373.6	337		11373.6	94
	11373.9	341		11373.9	110
	11374.2	354		11374.2	109
	11374.6	354		11374.6	112
	11374.9	360		11374.9	108
	11375.2	365		11375.2	107
	11375.5	372		11375.5	109
	11375.9	390		11375.9	112
	11376.2	365		11376.2	124
	11376.5	373		11376.5	113
	11376.8	365		11376.8	122
	11377.2	384		11377.2	120
	11377.5	369		11377.5	127
	11377.8	412		11377.8	114
	11378.1	417		11378.1	123
	11378.5	406		11378.5	125
	11378.8	406		11378.8	132
	11379.1	412		11379.1	117
	11379.4	432		11379.4	119
	11379.8	423		11379.8	120
	11380.1	420		11380.1	132
	11380.4	446		11380.4	117
	11380.8	436		11380.8	136
	11381.1	438		11381.1	135
	11381.4	433		11381.4	141
	11381.7	451		11381.7	147
	11382.1	469		11382.1	149
	11382.4	479		11382.4	157
	11382.7	498		11382.7	155
	11383	495		11383	150
	11383.4	497		11383.4	166
	11383.7	526		11383.7	180
	11384	535		11384	166
	11384.3	531		11384.3	177
	11384.7	535		11384.7	168
	11385	537		11385	175
	11385.3	544		11385.3	187
	11385.6	562		11385.6	187
	11386	569		11386	189
	11386.3	555		11386.3	197
	11386.6	556		11386.6	188
	11386.9	544		11386.9	188
	11387.3	527		11387.3	196
	11387.6	528		11387.6	205
	11387.9	512		11387.9	209
	11388.2	509		11388.2	193
	11388.6	511		11388.6	189
	11388.9	486		11388.9	189
	11389.2	494		11389.2	193
	11389.5	474		11389.5	167
	11389.9	469		11389.9	162
	11390.2	463		11390.2	167
	11390.5	460		11390.5	155
	11390.8	450		11390.8	169
	11391.2	454		11391.2	181
	11391.5	438		11391.5	168
	11391.8	430		11391.8	152
	11392.2	420		11392.2	148
	11392.5	423		11392.5	143
	11392.8	401		11392.8	156
	11393.1	397		11393.1	138
	11393.5	401		11393.5	147
	11393.8	381		11393.8	144
	11394.1	399		11394.1	146
	11394.4	401		11394.4	148
	11394.8	401		11394.8	148
	11395.1	385		11395.1	148
	11395.4	391		11395.4	155
	11395.7	394		11395.7	147
	11396.1	403		11396.1	160
	11396.4	407		11396.4	153
	11396.7	394		11396.7	163
	11397	390		11397	163
	11397.4	379		11397.4	173
	11397.7	398		11397.7	171
	11398	378		11398	165
	11398.3	394		11398.3	171
	11398.7	373		11398.7	165
	11399	369		11399	161
	11399.3	385		11399.3	161
	11399.6	381		11399.6	162
	11400	358		11400	159
	11400.3	367		11400.3	146
	11400.6	370		11400.6	145
	11400.9	348		11400.9	141
	11401.3	346		11401.3	143
	11401.6	338		11401.6	129
	11401.9	326		11401.9	115
	11402.3	313		11402.3	112
	11402.6	305		11402.6	115
	11402.9	288		11402.9	97
	11403.2	277		11403.2	96
	11403.6	284		11403.6	104
	11403.9	270		11403.9	99
	11404.2	274		11404.2	94
	11404.5	274		11404.5	91
	11404.9	286		11404.9	99
	11405.2	277		11405.2	93
	11405.5	281		11405.5	92
	11405.8	285		11405.8	87
	11406.2	286		11406.2	79
	11406.5	289		11406.5	89
	11406.8	271		11406.8	77
	11407.1	269		11407.1	82
	11407.5	246		11407.5	76
	11407.8	266		11407.8	93
	11408.1	272		11408.1	85
	11408.4	267		11408.4	81
	11408.8	274		11408.8	80
	11409.1	266		11409.1	87
	11409.4	259		11409.4	83
	11409.8	262		11409.8	80
	11410.1	263		11410.1	75
	11410.4	270		11410.4	73
	11410.7	256		11410.7	74
	11411.1	276		11411.1	80
	11411.4	293		11411.4	77
	11411.7	271		11411.7	65
	11412	283		11412	74
	11412.4	285		11412.4	65
	11412.7	299		11412.7	71
	11413	284		11413	75
	11413.3	285		11413.3	76
	11413.7	301		11413.7	85
	11414	292		11414	83
	11414.3	285		11414.3	88
	11414.6	302		11414.6	84
	11415	299		11415	85
	11415.3	293		11415.3	94
	11415.6	292		11415.6	88
	11415.9	295		11415.9	80
	11416.3	291		11416.3	87
	11416.6	306		11416.6	89
	11416.9	313		11416.9	80
	11417.3	308		11417.3	105
	11417.6	284		11417.6	102
	11417.9	298		11417.9	98
	11418.2	298		11418.2	89
	11418.6	306		11418.6	98
	11418.9	316		11418.9	91
	11419.2	307		11419.2	99
	11419.5	301		11419.5	93
	11419.9	321		11419.9	91
	11420.2	320		11420.2	88
	11420.5	331		11420.5	78
	11420.8	317		11420.8	85
	11421.2	318		11421.2	81
	11421.5	317		11421.5	98
	11421.8	318		11421.8	95
	11422.1	336		11422.1	87
	11422.5	326		11422.5	86
	11422.8	327		11422.8	77
	11423.1	309		11423.1	80
	11423.4	306		11423.4	77
	11423.8	299		11423.8	73
	11424.1	301		11424.1	77
	11424.4	286		11424.4	64
	11424.8	287		11424.8	54
	11425.1	277		11425.1	60
	11425.4	278		11425.4	63
	11425.7	279		11425.7	68
	11426.1	249		11426.1	59
	11426.4	258		11426.4	71
	11426.7	264		11426.7	70
	11427	255		11427	69
	11427.4	258		11427.4	72
	11427.7	232		11427.7	73
	11428	251		11428	71
	11428.3	240		11428.3	60
	11428.7	248		11428.7	75
	11429	243		11429	78
	11429.3	239		11429.3	72
	11429.6	241		11429.6	83
	11430	247		11430	78
	11430.3	250		11430.3	73
	11430.6	242		11430.6	77
	11431	264		11431	82
	11431.3	257		11431.3	73
	11431.6	255		11431.6	66
	11431.9	250		11431.9	67
	11432.3	249		11432.3	72
	11432.6	237		11432.6	65
	11432.9	242		11432.9	58
	11433.2	250		11433.2	69
	11433.6	226		11433.6	68
	11433.9	241		11433.9	64
	11434.2	238		11434.2	66
	11434.5	228		11434.5	59
	11434.9	218		11434.9	62
	11435.2	213		11435.2	66
	11435.5	243		11435.5	64
	11435.8	251		11435.8	85
	11436.2	257		11436.2	70
	11436.5	268		11436.5	83
	11436.8	278		11436.8	75
	11437.2	281		11437.2	68
	11437.5	287		11437.5	70
	11437.8	281		11437.8	69
	11438.1	280		11438.1	78
	11438.5	286		11438.5	77
	11438.8	274		11438.8	68
	11439.1	280		11439.1	67
	11439.4	290		11439.4	67
	11439.8	300		11439.8	67
	11440.1	282		11440.1	82
	11440.4	296		11440.4	76
	11440.7	299		11440.7	79
	11441.1	316		11441.1	83
	11441.4	326		11441.4	84
	11441.7	336		11441.7	82
	11442.1	348		11442.1	88
	11442.4	363		11442.4	86
	11442.7	363		11442.7	87
	11443	382		11443	89
	11443.4	374		11443.4	88
	11443.7	387		11443.7	100
	11444	384		11444	103
	11444.3	393		11444.3	97
	11444.7	392		11444.7	103
	11445	399		11445	117
	11445.3	441		11445.3	118
	11445.6	451		11445.6	130
	11446	436		11446	118
	11446.3	438		11446.3	135
	11446.6	438		11446.6	139
	11446.9	452		11446.9	143
	11447.3	430		11447.3	129
	11447.6	427		11447.6	138
	11447.9	432		11447.9	125
	11448.3	415		11448.3	133
	11448.6	411		11448.6	133
	11448.9	395		11448.9	128
	11449.2	382		11449.2	120
	11449.6	381		11449.6	118
	11449.9	378		11449.9	106
	11450.2	358		11450.2	120
	11450.5	347		11450.5	119
	11450.9	351		11450.9	117
	11451.2	341		11451.2	105
	11451.5	350		11451.5	107
	11451.8	343		11451.8	95
	11452.2	334		11452.2	86
	11452.5	327		11452.5	93
	11452.8	339		11452.8	85
	11453.2	334		11453.2	85
	11453.5	337		11453.5	81
	11453.8	338		11453.8	69
	11454.1	348		11454.1	97
	11454.5	365		11454.5	87
	11454.8	383		11454.8	96
	11455.1	392		11455.1	95
	11455.4	405		11455.4	94
	11455.8	407		11455.8	107
	11456.1	417		11456.1	118
	11456.4	443		11456.4	127
	11456.7	492		11456.7	131
	11457.1	500		11457.1	137
	11457.4	541		11457.4	148
	11457.7	598		11457.7	154
	11458.1	623		11458.1	168
	11458.4	657		11458.4	190
	11458.7	704		11458.7	199
	11459	730		11459	217
	11459.4	754		11459.4	230
	11459.7	794		11459.7	238
	11460	797		11460	261
	11460.3	839		11460.3	280
	11460.7	867		11460.7	294
	11461	882		11461	291
	11461.3	899		11461.3	287
	11461.6	907		11461.6	296
	11462	896		11462	302
	11462.3	932		11462.3	313
	11462.6	937		11462.6	355
	11463	944		11463	344
	11463.3	929		11463.3	354
	11463.6	938		11463.6	339
	11463.9	917		11463.9	319
	11464.3	925		11464.3	319
	11464.6	912		11464.6	335
	11464.9	888		11464.9	313
	11465.2	884		11465.2	307
	11465.6	843		11465.6	306
	11465.9	842		11465.9	307
	11466.2	829		11466.2	290
	11466.6	819		11466.6	290
	11466.9	764		11466.9	278
	11467.2	769		11467.2	269
	11467.5	744		11467.5	257
	11467.9	728		11467.9	234
	11468.2	701		11468.2	235
	11468.5	698		11468.5	209
	11468.8	670		11468.8	221
	11469.2	656		11469.2	212
	11469.5	650		11469.5	209
	11469.8	634		11469.8	209
	11470.1	626		11470.1	212
	11470.5	586		11470.5	199
	11470.8	589		11470.8	201
	11471.1	575		11471.1	191
	11471.5	572		11471.5	186
	11471.8	584		11471.8	180
	11472.1	573		11472.1	181
	11472.4	562		11472.4	184
	11472.8	564		11472.8	189
	11473.1	574		11473.1	188
	11473.4	565		11473.4	181
	11473.7	564		11473.7	180
	11474.1	544		11474.1	193
	11474.4	552		11474.4	175
	11474.7	559		11474.7	178
	11475.1	559		11475.1	173
	11475.4	527		11475.4	173
	11475.7	530		11475.7	168
	11476	540		11476	177
	11476.4	534		11476.4	168
	11476.7	541		11476.7	155
	11477	530		11477	176
	11477.3	515		11477.3	166
	11477.7	523		11477.7	169
	11478	512		11478	164
	11478.3	514		11478.3	169
	11478.6	528		11478.6	183
	11479	510		11479	180
	11479.3	562		11479.3	178
	11479.6	587		11479.6	187
	11480	602		11480	188
	11480.3	646		11480.3	199
	11480.6	674		11480.6	192
	11480.9	709		11480.9	211
	11481.3	745		11481.3	220
	11481.6	781		11481.6	252
	11481.9	851		11481.9	287
	11482.2	940		11482.2	319
	11482.6	1038		11482.6	334
	11482.9	1146		11482.9	369
	11483.2	1240		11483.2	417
	11483.6	1390		11483.6	467
	11483.9	1541		11483.9	529
	11484.2	1675		11484.2	601
	11484.5	1819		11484.5	676
	11484.9	1988		11484.9	748
	11485.2	2162		11485.2	839
	11485.5	2360		11485.5	887
	11485.8	2560		11485.8	959
	11486.2	2761		11486.2	1020
	11486.5	2957		11486.5	1134
	11486.8	3168		11486.8	1230
	11487.2	3354		11487.2	1342
	11487.5	3518		11487.5	1408
	11487.8	3675		11487.8	1481
	11488.1	3834		11488.1	1551
	11488.5	3935		11488.5	1626
	11488.8	4053		11488.8	1656
	11489.1	4152		11489.1	1728
	11489.4	4235		11489.4	1766
	11489.8	4282		11489.8	1783
	11490.1	4295		11490.1	1807
	11490.4	4300		11490.4	1817
	11490.8	4318		11490.8	1825
	11491.1	4313		11491.1	1802
	11491.4	4284		11491.4	1828
	11491.7	4235		11491.7	1778
	11492.1	4157		11492.1	1730
	11492.4	4047		11492.4	1690
	11492.7	3959		11492.7	1652
	11493	3857		11493	1609
	11493.4	3729		11493.4	1536
	11493.7	3639		11493.7	1473
	11494	3481		11494	1422
	11494.4	3348		11494.4	1351
	11494.7	3228		11494.7	1290
	11495	3098		11495	1236
	11495.3	2989		11495.3	1186
	11495.7	2814		11495.7	1138
	11496	2709		11496	1093
	11496.3	2550		11496.3	1038
	11496.6	2426		11496.6	995
	11497	2301		11497	931
	11497.3	2220		11497.3	854
	11497.6	2130		11497.6	815
	11498	2018		11498	781
	11498.3	1943		11498.3	734
	11498.6	1870		11498.6	716
	11498.9	1825		11498.9	684
	11499.3	1793		11499.3	662
	11499.6	1749		11499.6	661
	11499.9	1746		11499.9	628

## Sheet: Fig.2F
m/z	Intensity (AU)
11200.1	13
11200.5	15
11200.8	18
11201.1	22
11201.4	22
11201.8	17
11202.1	20
11202.4	13
11202.7	15
11203.1	11
11203.4	15
11203.7	15
11204	11
11204.3	15
11204.7	11
11205	8
11205.3	10
11205.6	13
11206	11
11206.3	13
11206.6	13
11206.9	13
11207.2	21
11207.6	16
11207.9	21
11208.2	26
11208.5	22
11208.9	20
11209.2	25
11209.5	25
11209.8	18
11210.2	24
11210.5	25
11210.8	24
11211.1	22
11211.5	28
11211.8	18
11212.1	24
11212.4	22
11212.7	20
11213.1	14
11213.4	16
11213.7	21
11214	21
11214.4	18
11214.7	20
11215	14
11215.3	18
11215.7	22
11216	24
11216.3	25
11216.6	24
11216.9	26
11217.3	22
11217.6	29
11217.9	25
11218.2	23
11218.6	24
11218.9	20
11219.2	22
11219.5	21
11219.9	23
11220.2	27
11220.5	25
11220.8	21
11221.1	20
11221.5	14
11221.8	18
11222.1	28
11222.4	24
11222.8	23
11223.1	21
11223.4	25
11223.7	23
11224.1	23
11224.4	20
11224.7	20
11225	28
11225.3	19
11225.7	24
11226	29
11226.3	30
11226.6	26
11227	21
11227.3	23
11227.6	22
11227.9	26
11228.3	21
11228.6	18
11228.9	17
11229.2	17
11229.6	23
11229.9	26
11230.2	27
11230.5	26
11230.8	25
11231.2	33
11231.5	32
11231.8	29
11232.1	28
11232.5	24
11232.8	27
11233.1	24
11233.4	19
11233.8	32
11234.1	26
11234.4	31
11234.7	30
11235.1	27
11235.4	39
11235.7	31
11236	39
11236.3	43
11236.7	45
11237	49
11237.3	64
11237.6	56
11238	65
11238.3	62
11238.6	78
11238.9	76
11239.3	77
11239.6	81
11239.9	82
11240.2	89
11240.6	84
11240.9	85
11241.2	88
11241.5	95
11241.8	95
11242.2	89
11242.5	91
11242.8	102
11243.1	84
11243.5	87
11243.8	74
11244.1	83
11244.4	86
11244.8	91
11245.1	85
11245.4	81
11245.7	73
11246.1	85
11246.4	79
11246.7	86
11247	83
11247.3	79
11247.7	73
11248	68
11248.3	86
11248.6	88
11249	78
11249.3	72
11249.6	72
11249.9	76
11250.3	88
11250.6	87
11250.9	85
11251.2	75
11251.6	81
11251.9	78
11252.2	81
11252.5	87
11252.8	91
11253.2	92
11253.5	83
11253.8	95
11254.1	95
11254.5	105
11254.8	97
11255.1	100
11255.4	102
11255.8	103
11256.1	93
11256.4	95
11256.7	98
11257.1	88
11257.4	88
11257.7	99
11258	103
11258.4	117
11258.7	110
11259	111
11259.3	103
11259.6	102
11260	123
11260.3	113
11260.6	123
11260.9	120
11261.3	125
11261.6	135
11261.9	148
11262.2	151
11262.6	147
11262.9	169
11263.2	176
11263.5	177
11263.9	199
11264.2	201
11264.5	214
11264.8	219
11265.2	230
11265.5	248
11265.8	265
11266.1	301
11266.5	308
11266.8	350
11267.1	377
11267.4	390
11267.7	414
11268.1	422
11268.4	429
11268.7	445
11269	439
11269.4	442
11269.7	443
11270	446
11270.3	447
11270.7	460
11271	484
11271.3	468
11271.6	475
11272	477
11272.3	452
11272.6	457
11272.9	455
11273.3	443
11273.6	453
11273.9	457
11274.2	442
11274.6	438
11274.9	434
11275.2	429
11275.5	387
11275.8	410
11276.2	404
11276.5	393
11276.8	392
11277.1	396
11277.5	388
11277.8	392
11278.1	366
11278.4	368
11278.8	359
11279.1	367
11279.4	354
11279.7	368
11280.1	361
11280.4	372
11280.7	365
11281	349
11281.4	356
11281.7	348
11282	334
11282.3	345
11282.7	328
11283	331
11283.3	324
11283.6	330
11284	338
11284.3	319
11284.6	319
11284.9	306
11285.2	308
11285.6	286
11285.9	289
11286.2	281
11286.5	284
11286.9	274
11287.2	285
11287.5	289
11287.8	286
11288.2	280
11288.5	282
11288.8	283
11289.1	275
11289.5	281
11289.8	301
11290.1	304
11290.4	299
11290.8	318
11291.1	343
11291.4	355
11291.7	382
11292.1	405
11292.4	422
11292.7	451
11293	466
11293.4	513
11293.7	557
11294	584
11294.3	609
11294.7	635
11295	649
11295.3	690
11295.6	704
11295.9	746
11296.3	763
11296.6	775
11296.9	769
11297.2	768
11297.6	778
11297.9	792
11298.2	810
11298.5	787
11298.9	796
11299.2	813
11299.5	811
11299.8	807
11300.2	807
11300.5	795
11300.8	785
11301.1	779
11301.5	767
11301.8	773
11302.1	787
11302.4	792
11302.8	774
11303.1	770
11303.4	767
11303.7	796
11304.1	808
11304.4	849
11304.7	919
11305	988
11305.4	1102
11305.7	1225
11306	1396
11306.3	1596
11306.7	1852
11307	2155
11307.3	2524
11307.6	2964
11308	3441
11308.3	3989
11308.6	4585
11308.9	5246
11309.3	5966
11309.6	6763
11309.9	7611
11310.2	8485
11310.5	9391
11310.9	10271
11311.2	11162
11311.5	12042
11311.8	12852
11312.2	13634
11312.5	14382
11312.8	15130
11313.1	15761
11313.5	16295
11313.8	16684
11314.1	16980
11314.4	17170
11314.8	17246
11315.1	17264
11315.4	17163
11315.7	16992
11316.1	16738
11316.4	16392
11316.7	15987
11317	15515
11317.4	15045
11317.7	14536
11318	13988
11318.3	13455
11318.7	12867
11319	12251
11319.3	11684
11319.6	11148
11320	10588
11320.3	10012
11320.6	9515
11320.9	9008
11321.3	8570
11321.6	8125
11321.9	7688
11322.2	7296
11322.6	6886
11322.9	6496
11323.2	6171
11323.5	5834
11323.9	5514
11324.2	5242
11324.5	4986
11324.8	4768
11325.2	4533
11325.5	4330
11325.8	4149
11326.1	3998
11326.5	3851
11326.8	3695
11327.1	3616
11327.4	3508
11327.8	3391
11328.1	3297
11328.4	3232
11328.7	3134
11329.1	3073
11329.4	2989
11329.7	2927
11330	2879
11330.4	2792
11330.7	2747
11331	2679
11331.3	2581
11331.7	2505
11332	2446
11332.3	2375
11332.6	2297
11333	2241
11333.3	2168
11333.6	2114
11333.9	2050
11334.3	1982
11334.6	1893
11334.9	1821
11335.2	1761
11335.6	1693
11335.9	1661
11336.2	1600
11336.5	1575
11336.9	1557
11337.2	1504
11337.5	1522
11337.8	1500
11338.2	1509
11338.5	1561
11338.8	1628
11339.1	1690
11339.5	1801
11339.8	1910
11340.1	2042
11340.4	2203
11340.8	2418
11341.1	2637
11341.4	2879
11341.7	3106
11342.1	3401
11342.4	3708
11342.7	3995
11343	4335
11343.4	4631
11343.7	4892
11344	5201
11344.3	5490
11344.7	5756
11345	6006
11345.3	6199
11345.6	6376
11346	6541
11346.3	6649
11346.6	6740
11346.9	6778
11347.3	6787
11347.6	6753
11347.9	6714
11348.2	6641
11348.6	6588
11348.9	6458
11349.2	6284
11349.5	6140
11349.9	5943
11350.2	5773
11350.5	5577
11350.8	5376
11351.2	5192
11351.5	4955
11351.8	4743
11352.1	4560
11352.5	4325
11352.8	4110
11353.1	3892
11353.4	3698
11353.8	3485
11354.1	3313
11354.4	3132
11354.7	2976
11355.1	2817
11355.4	2691
11355.7	2547
11356	2428
11356.4	2326
11356.7	2201
11357	2114
11357.3	2025
11357.7	1931
11358	1840
11358.3	1793
11358.6	1707
11359	1649
11359.3	1589
11359.6	1566
11359.9	1515
11360.3	1470
11360.6	1424
11360.9	1364
11361.2	1360
11361.6	1317
11361.9	1301
11362.2	1243
11362.5	1212
11362.9	1183
11363.2	1149
11363.5	1135
11363.8	1124
11364.2	1097
11364.5	1074
11364.8	1047
11365.1	1005
11365.5	995
11365.8	959
11366.1	951
11366.4	914
11366.8	870
11367.1	842
11367.4	826
11367.7	814
11368.1	782
11368.4	773
11368.7	740
11369	716
11369.4	687
11369.7	676
11370	638
11370.3	630
11370.7	616
11371	598
11371.3	603
11371.6	593
11372	587
11372.3	568
11372.6	542
11373	539
11373.3	523
11373.6	504
11373.9	496
11374.3	507
11374.6	483
11374.9	482
11375.2	473
11375.6	462
11375.9	451
11376.2	451
11376.5	441
11376.9	462
11377.2	451
11377.5	449
11377.8	442
11378.2	440
11378.5	451
11378.8	450
11379.1	442
11379.5	426
11379.8	405
11380.1	409
11380.4	399
11380.8	398
11381.1	381
11381.4	382
11381.7	384
11382.1	379
11382.4	392
11382.7	380
11383	366
11383.4	373
11383.7	370
11384	358
11384.3	351
11384.7	351
11385	348
11385.3	336
11385.6	336
11386	335
11386.3	332
11386.6	338
11387	314
11387.3	315
11387.6	325
11387.9	340
11388.3	342
11388.6	334
11388.9	328
11389.2	315
11389.6	313
11389.9	307
11390.2	305
11390.5	288
11390.9	275
11391.2	280
11391.5	261
11391.8	283
11392.2	283
11392.5	294
11392.8	286
11393.1	265
11393.5	271
11393.8	285
11394.1	294
11394.4	284
11394.8	290
11395.1	292
11395.4	289
11395.7	286
11396.1	271
11396.4	291
11396.7	293
11397	291
11397.4	283
11397.7	301
11398	320
11398.4	314
11398.7	308
11399	322
11399.3	313
11399.7	316
11400	314
11400.3	310
11400.6	300
11401	308
11401.3	320
11401.6	303
11401.9	304
11402.3	281
11402.6	274
11402.9	286
11403.2	264
11403.6	264
11403.9	250
11404.2	234
11404.5	217
11404.9	230
11405.2	227
11405.5	218
11405.8	226
11406.2	215
11406.5	208
11406.8	209
11407.2	202
11407.5	215
11407.8	209
11408.1	224
11408.5	234
11408.8	226
11409.1	233
11409.4	233
11409.8	230
11410.1	231
11410.4	228
11410.7	232
11411.1	227
11411.4	235
11411.7	230
11412	228
11412.4	242
11412.7	247
11413	247
11413.3	250
11413.7	264
11414	265
11414.3	281
11414.6	259
11415	265
11415.3	258
11415.6	268
11416	257
11416.3	262
11416.6	250
11416.9	249
11417.3	249
11417.6	247
11417.9	260
11418.2	262
11418.6	260
11418.9	268
11419.2	250
11419.5	247
11419.9	253
11420.2	246
11420.5	259
11420.8	259
11421.2	256
11421.5	250
11421.8	263
11422.1	266
11422.5	275
11422.8	273
11423.1	273
11423.5	271
11423.8	288
11424.1	278
11424.4	301
11424.8	315
11425.1	333
11425.4	339
11425.7	347
11426.1	364
11426.4	390
11426.7	410
11427	410
11427.4	413
11427.7	445
11428	462
11428.3	457
11428.7	470
11429	480
11429.3	474
11429.7	510
11430	497
11430.3	512
11430.6	496
11431	481
11431.3	485
11431.6	488
11431.9	483
11432.3	491
11432.6	499
11432.9	508
11433.2	498
11433.6	472
11433.9	479
11434.2	460
11434.5	430
11434.9	439
11435.2	435
11435.5	428
11435.9	408
11436.2	418
11436.5	401
11436.8	400
11437.2	377
11437.5	359
11437.8	350
11438.1	332
11438.5	318
11438.8	305
11439.1	292
11439.4	293
11439.8	281
11440.1	259
11440.4	274
11440.7	273
11441.1	282
11441.4	273
11441.7	266
11442.1	270
11442.4	268
11442.7	264
11443	268
11443.4	260
11443.7	256
11444	242
11444.3	240
11444.7	229
11445	244
11445.3	213
11445.6	236
11446	225
11446.3	242
11446.6	249
11447	247
11447.3	250
11447.6	244
11447.9	265
11448.3	254
11448.6	236
11448.9	234
11449.2	242
11449.6	242
11449.9	230
11450.2	221
11450.5	227
11450.9	212
11451.2	207
11451.5	209
11451.9	196
11452.2	205
11452.5	194
11452.8	182
11453.2	174
11453.5	165
11453.8	167
11454.1	175
11454.5	176
11454.8	173
11455.1	156
11455.4	170
11455.8	180
11456.1	180
11456.4	180
11456.7	196
11457.1	181
11457.4	195
11457.7	202
11458.1	207
11458.4	204
11458.7	216
11459	229
11459.4	229
11459.7	215
11460	227
11460.3	213
11460.7	222
11461	225
11461.3	215
11461.6	206
11462	202
11462.3	231
11462.6	213
11463	229
11463.3	247
11463.6	247
11463.9	248
11464.3	240
11464.6	251
11464.9	245
11465.2	242
11465.6	254
11465.9	243
11466.2	225
11466.6	232
11466.9	212
11467.2	212
11467.5	210
11467.9	208
11468.2	203
11468.5	196
11468.8	187
11469.2	179
11469.5	187
11469.8	194
11470.1	201
11470.5	198
11470.8	201
11471.1	187
11471.5	194
11471.8	187
11472.1	193
11472.4	181
11472.8	185
11473.1	186
11473.4	190
11473.7	188
11474.1	204
11474.4	196
11474.7	190
11475	191
11475.4	192
11475.7	181
11476	193
11476.4	178
11476.7	196
11477	218
11477.3	214
11477.7	215
11478	231
11478.3	217
11478.6	213
11479	199
11479.3	183
11479.6	189
11480	180
11480.3	184
11480.6	185
11480.9	179
11481.3	182
11481.6	190
11481.9	189
11482.2	195
11482.6	202
11482.9	188
11483.2	193
11483.6	188
11483.9	203
11484.2	195
11484.5	215
11484.9	216
11485.2	217
11485.5	226
11485.8	215
11486.2	213
11486.5	214
11486.8	225
11487.1	218
11487.5	226
11487.8	238
11488.1	238
11488.5	241
11488.8	251
11489.1	275
11489.4	291
11489.8	304
11490.1	304
11490.4	323
11490.7	337
11491.1	359
11491.4	365
11491.7	384
11492.1	414
11492.4	420
11492.7	430
11493	431
11493.4	434
11493.7	432
11494	460
11494.3	457
11494.7	467
11495	454
11495.3	444
11495.7	447
11496	423
11496.3	426
11496.6	418
11497	404
11497.3	390
11497.6	379
11497.9	373
11498.3	347
11498.6	337
11498.9	354
11499.3	352
11499.6	336
11499.9	345

## Sheet: Fig.2G
m/z	Intensity (AU)
11200.2	13
11200.6	14
11200.9	20
11201.2	18
11201.5	14
11201.9	18
11202.2	16
11202.5	19
11202.8	10
11203.1	12
11203.5	12
11203.8	15
11204.1	12
11204.4	17
11204.8	11
11205.1	12
11205.4	17
11205.7	12
11206.1	16
11206.4	14
11206.7	14
11207	16
11207.3	17
11207.7	22
11208	27
11208.3	20
11208.6	22
11209	19
11209.3	24
11209.6	20
11209.9	22
11210.3	21
11210.6	19
11210.9	22
11211.2	25
11211.5	23
11211.9	23
11212.2	22
11212.5	22
11212.8	23
11213.2	26
11213.5	29
11213.8	29
11214.1	24
11214.5	22
11214.8	23
11215.1	27
11215.4	32
11215.7	21
11216.1	28
11216.4	23
11216.7	28
11217	19
11217.4	25
11217.7	21
11218	24
11218.3	23
11218.7	22
11219	17
11219.3	21
11219.6	25
11219.9	19
11220.3	18
11220.6	25
11220.9	26
11221.2	17
11221.6	26
11221.9	25
11222.2	19
11222.5	21
11222.9	25
11223.2	19
11223.5	22
11223.8	24
11224.2	21
11224.5	20
11224.8	25
11225.1	23
11225.4	26
11225.8	27
11226.1	34
11226.4	41
11226.7	40
11227.1	40
11227.4	41
11227.7	30
11228	32
11228.4	43
11228.7	33
11229	32
11229.3	28
11229.6	30
11230	30
11230.3	33
11230.6	34
11230.9	33
11231.3	36
11231.6	28
11231.9	22
11232.2	30
11232.6	29
11232.9	22
11233.2	31
11233.5	35
11233.9	37
11234.2	37
11234.5	32
11234.8	32
11235.1	27
11235.5	28
11235.8	36
11236.1	31
11236.4	35
11236.8	29
11237.1	38
11237.4	34
11237.7	44
11238.1	43
11238.4	45
11238.7	48
11239	45
11239.4	38
11239.7	45
11240	45
11240.3	41
11240.6	52
11241	52
11241.3	59
11241.6	62
11241.9	58
11242.3	58
11242.6	62
11242.9	70
11243.2	65
11243.6	65
11243.9	69
11244.2	73
11244.5	64
11244.9	60
11245.2	59
11245.5	58
11245.8	55
11246.1	49
11246.5	56
11246.8	60
11247.1	60
11247.4	62
11247.8	64
11248.1	56
11248.4	63
11248.7	65
11249.1	44
11249.4	45
11249.7	53
11250	50
11250.4	54
11250.7	58
11251	64
11251.3	65
11251.6	77
11252	72
11252.3	67
11252.6	68
11252.9	74
11253.3	79
11253.6	88
11253.9	89
11254.2	98
11254.6	100
11254.9	106
11255.2	97
11255.5	108
11255.9	98
11256.2	95
11256.5	104
11256.8	104
11257.2	96
11257.5	85
11257.8	93
11258.1	90
11258.4	94
11258.8	107
11259.1	106
11259.4	101
11259.7	93
11260.1	85
11260.4	103
11260.7	99
11261	106
11261.4	105
11261.7	114
11262	132
11262.3	132
11262.7	140
11263	151
11263.3	155
11263.6	171
11264	174
11264.3	176
11264.6	199
11264.9	205
11265.2	240
11265.6	240
11265.9	259
11266.2	274
11266.5	298
11266.9	297
11267.2	312
11267.5	320
11267.8	342
11268.2	351
11268.5	369
11268.8	385
11269.1	395
11269.5	399
11269.8	408
11270.1	406
11270.4	408
11270.8	426
11271.1	410
11271.4	406
11271.7	423
11272.1	411
11272.4	425
11272.7	392
11273	373
11273.3	368
11273.7	365
11274	355
11274.3	370
11274.6	371
11275	364
11275.3	374
11275.6	362
11275.9	359
11276.3	349
11276.6	388
11276.9	372
11277.2	368
11277.6	384
11277.9	388
11278.2	391
11278.5	390
11278.9	404
11279.2	394
11279.5	408
11279.8	406
11280.2	413
11280.5	411
11280.8	395
11281.1	388
11281.5	383
11281.8	383
11282.1	376
11282.4	378
11282.7	366
11283.1	354
11283.4	361
11283.7	376
11284	359
11284.4	362
11284.7	363
11285	374
11285.3	354
11285.7	353
11286	341
11286.3	331
11286.6	325
11287	319
11287.3	315
11287.6	298
11287.9	308
11288.3	312
11288.6	291
11288.9	302
11289.2	306
11289.6	304
11289.9	330
11290.2	334
11290.5	338
11290.9	354
11291.2	366
11291.5	375
11291.8	391
11292.1	378
11292.5	409
11292.8	436
11293.1	441
11293.4	479
11293.8	519
11294.1	538
11294.4	558
11294.7	600
11295.1	626
11295.4	669
11295.7	652
11296	709
11296.4	734
11296.7	750
11297	750
11297.3	761
11297.7	772
11298	770
11298.3	798
11298.6	784
11299	800
11299.3	772
11299.6	764
11299.9	747
11300.3	747
11300.6	745
11300.9	726
11301.2	724
11301.6	720
11301.9	740
11302.2	726
11302.5	718
11302.9	732
11303.2	733
11303.5	742
11303.8	725
11304.2	741
11304.5	755
11304.8	795
11305.1	821
11305.4	849
11305.8	917
11306.1	980
11306.4	1081
11306.7	1204
11307.1	1351
11307.4	1576
11307.7	1806
11308	2088
11308.4	2423
11308.7	2806
11309	3274
11309.3	3787
11309.7	4315
11310	4886
11310.3	5466
11310.6	6153
11311	6831
11311.3	7520
11311.6	8204
11311.9	8831
11312.3	9459
11312.6	10074
11312.9	10627
11313.2	11127
11313.6	11571
11313.9	11949
11314.2	12303
11314.5	12558
11314.9	12756
11315.2	12821
11315.5	12818
11315.8	12767
11316.2	12656
11316.5	12469
11316.8	12222
11317.1	11927
11317.5	11619
11317.8	11270
11318.1	10874
11318.4	10462
11318.8	10049
11319.1	9593
11319.4	9135
11319.7	8709
11320.1	8291
11320.4	7846
11320.7	7420
11321	7004
11321.4	6576
11321.7	6202
11322	5868
11322.3	5543
11322.7	5233
11323	4940
11323.3	4645
11323.6	4418
11324	4213
11324.3	4003
11324.6	3798
11324.9	3603
11325.3	3452
11325.6	3298
11325.9	3188
11326.2	3054
11326.6	2968
11326.9	2868
11327.2	2810
11327.5	2736
11327.9	2665
11328.2	2603
11328.5	2559
11328.8	2538
11329.1	2496
11329.5	2449
11329.8	2415
11330.1	2410
11330.4	2389
11330.8	2345
11331.1	2293
11331.4	2243
11331.7	2190
11332.1	2133
11332.4	2049
11332.7	1985
11333	1921
11333.4	1853
11333.7	1815
11334	1758
11334.3	1706
11334.7	1672
11335	1581
11335.3	1527
11335.6	1452
11336	1391
11336.3	1325
11336.6	1316
11336.9	1283
11337.3	1243
11337.6	1235
11337.9	1213
11338.2	1222
11338.6	1253
11338.9	1301
11339.2	1374
11339.5	1476
11339.9	1561
11340.2	1696
11340.5	1852
11340.8	2035
11341.2	2231
11341.5	2457
11341.8	2696
11342.1	2976
11342.5	3266
11342.8	3593
11343.1	3912
11343.4	4220
11343.8	4568
11344.1	4908
11344.4	5225
11344.7	5543
11345.1	5861
11345.4	6140
11345.7	6395
11346	6635
11346.4	6848
11346.7	6998
11347	7097
11347.3	7150
11347.7	7188
11348	7152
11348.3	7134
11348.6	7070
11349	6983
11349.3	6833
11349.6	6630
11349.9	6458
11350.3	6213
11350.6	6028
11350.9	5796
11351.2	5542
11351.6	5325
11351.9	5078
11352.2	4833
11352.5	4613
11352.9	4400
11353.2	4185
11353.5	3937
11353.9	3718
11354.2	3525
11354.5	3322
11354.8	3150
11355.2	2952
11355.5	2808
11355.8	2643
11356.1	2546
11356.5	2379
11356.8	2312
11357.1	2189
11357.4	2069
11357.8	2004
11358.1	1924
11358.4	1844
11358.7	1769
11359.1	1676
11359.4	1640
11359.7	1590
11360	1556
11360.4	1502
11360.7	1480
11361	1465
11361.3	1416
11361.7	1391
11362	1390
11362.3	1335
11362.6	1320
11363	1303
11363.3	1275
11363.6	1243
11363.9	1198
11364.3	1203
11364.6	1149
11364.9	1120
11365.2	1090
11365.6	1062
11365.9	1054
11366.2	1002
11366.5	976
11366.9	937
11367.2	935
11367.5	865
11367.8	829
11368.2	795
11368.5	756
11368.8	750
11369.1	728
11369.5	702
11369.8	683
11370.1	655
11370.4	626
11370.8	629
11371.1	614
11371.4	588
11371.7	577
11372.1	552
11372.4	521
11372.7	528
11373	500
11373.4	488
11373.7	474
11374	446
11374.3	451
11374.7	457
11375	446
11375.3	438
11375.6	425
11376	437
11376.3	428
11376.6	440
11376.9	438
11377.3	413
11377.6	421
11377.9	400
11378.3	420
11378.6	386
11378.9	406
11379.2	398
11379.6	406
11379.9	410
11380.2	383
11380.5	383
11380.9	378
11381.2	368
11381.5	374
11381.8	345
11382.2	351
11382.5	334
11382.8	359
11383.1	358
11383.5	365
11383.8	385
11384.1	352
11384.4	383
11384.8	358
11385.1	349
11385.4	347
11385.7	341
11386.1	342
11386.4	335
11386.7	347
11387	348
11387.4	340
11387.7	330
11388	317
11388.3	294
11388.7	306
11389	307
11389.3	299
11389.6	293
11390	284
11390.3	274
11390.6	276
11391	283
11391.3	281
11391.6	298
11391.9	305
11392.3	314
11392.6	292
11392.9	298
11393.2	308
11393.6	286
11393.9	312
11394.2	287
11394.5	286
11394.9	306
11395.2	309
11395.5	304
11395.8	310
11396.2	296
11396.5	312
11396.8	326
11397.1	300
11397.5	301
11397.8	325
11398.1	316
11398.4	309
11398.8	292
11399.1	312
11399.4	304
11399.7	301
11400.1	293
11400.4	280
11400.7	296
11401.1	296
11401.4	281
11401.7	274
11402	285
11402.4	281
11402.7	257
11403	252
11403.3	232
11403.7	233
11404	222
11404.3	231
11404.6	204
11405	213
11405.3	204
11405.6	219
11405.9	202
11406.3	204
11406.6	215
11406.9	203
11407.2	207
11407.6	209
11407.9	222
11408.2	221
11408.5	216
11408.9	214
11409.2	212
11409.5	215
11409.9	210
11410.2	218
11410.5	226
11410.8	235
11411.2	216
11411.5	214
11411.8	225
11412.1	231
11412.5	222
11412.8	241
11413.1	225
11413.4	246
11413.8	252
11414.1	257
11414.4	252
11414.7	255
11415.1	256
11415.4	262
11415.7	255
11416	252
11416.4	264
11416.7	278
11417	266
11417.3	274
11417.7	274
11418	271
11418.3	273
11418.7	278
11419	281
11419.3	286
11419.6	267
11420	262
11420.3	261
11420.6	247
11420.9	266
11421.3	270
11421.6	279
11421.9	287
11422.2	287
11422.6	277
11422.9	283
11423.2	301
11423.5	306
11423.9	326
11424.2	353
11424.5	384
11424.9	413
11425.2	440
11425.5	476
11425.8	479
11426.2	508
11426.5	541
11426.8	560
11427.1	621
11427.5	652
11427.8	677
11428.1	698
11428.4	722
11428.8	725
11429.1	763
11429.4	800
11429.7	811
11430.1	822
11430.4	816
11430.7	833
11431	809
11431.4	802
11431.7	800
11432	783
11432.4	783
11432.7	767
11433	772
11433.3	742
11433.7	722
11434	709
11434.3	679
11434.6	646
11435	625
11435.3	602
11435.6	596
11435.9	573
11436.3	551
11436.6	542
11436.9	512
11437.2	506
11437.6	479
11437.9	451
11438.2	422
11438.6	405
11438.9	389
11439.2	370
11439.5	369
11439.9	367
11440.2	335
11440.5	329
11440.8	305
11441.2	291
11441.5	308
11441.8	287
11442.1	289
11442.5	286
11442.8	296
11443.1	279
11443.5	275
11443.8	282
11444.1	273
11444.4	281
11444.8	281
11445.1	274
11445.4	261
11445.7	264
11446.1	249
11446.4	256
11446.7	247
11447	240
11447.4	226
11447.7	231
11448	232
11448.3	234
11448.7	225
11449	233
11449.3	209
11449.7	224
11450	207
11450.3	205
11450.6	220
11451	222
11451.3	215
11451.6	219
11451.9	210
11452.3	192
11452.6	186
11452.9	201
11453.2	204
11453.6	199
11453.9	198
11454.2	205
11454.6	205
11454.9	210
11455.2	211
11455.5	213
11455.9	213
11456.2	218
11456.5	221
11456.8	223
11457.2	230
11457.5	233
11457.8	236
11458.1	241
11458.5	242
11458.8	242
11459.1	255
11459.5	241
11459.8	249
11460.1	253
11460.4	251
11460.8	250
11461.1	265
11461.4	258
11461.7	281
11462.1	298
11462.4	300
11462.7	291
11463	302
11463.4	282
11463.7	299
11464	296
11464.4	294
11464.7	288
11465	278
11465.3	273
11465.7	268
11466	261
11466.3	260
11466.6	266
11467	265
11467.3	244
11467.6	256
11468	255
11468.3	236
11468.6	241
11468.9	240
11469.3	240
11469.6	231
11469.9	204
11470.2	209
11470.6	212
11470.9	199
11471.2	205
11471.5	205
11471.9	211
11472.2	210
11472.5	194
11472.9	204
11473.2	209
11473.5	215
11473.8	219
11474.2	211
11474.5	211
11474.8	221
11475.1	210
11475.5	204
11475.8	220
11476.1	231
11476.4	228
11476.8	228
11477.1	220
11477.4	222
11477.8	247
11478.1	254
11478.4	241
11478.7	235
11479.1	232
11479.4	219
11479.7	215
11480	219
11480.4	202
11480.7	205
11481	199
11481.4	195
11481.7	201
11482	203
11482.3	194
11482.7	187
11483	183
11483.3	181
11483.6	189
11484	187
11484.3	189
11484.6	182
11485	178
11485.3	173
11485.6	169
11485.9	168
11486.3	163
11486.6	188
11486.9	188
11487.2	199
11487.6	203
11487.9	198
11488.2	200
11488.5	204
11488.9	219
11489.2	231
11489.5	230
11489.9	252
11490.2	270
11490.5	276
11490.8	288
11491.2	301
11491.5	332
11491.8	326
11492.1	325
11492.5	331
11492.8	350
11493.1	360
11493.5	362
11493.8	383
11494.1	394
11494.4	394
11494.8	381
11495.1	394
11495.4	403
11495.7	382
11496.1	361
11496.4	388
11496.7	383
11497.1	359
11497.4	364
11497.7	363
11498	351
11498.4	333
11498.7	316
11499	320
11499.3	287
11499.7	302

## Sheet: Fig.2H
m/z	Intensity (AU)
11200.1	7
11200.5	10
11200.8	6
11201.1	10
11201.4	10
11201.8	7
11202.1	11
11202.4	12
11202.7	9
11203.1	11
11203.4	8
11203.7	8
11204	6
11204.3	10
11204.7	14
11205	16
11205.3	19
11205.6	14
11206	20
11206.3	18
11206.6	19
11206.9	17
11207.2	16
11207.6	21
11207.9	21
11208.2	27
11208.5	22
11208.9	25
11209.2	26
11209.5	21
11209.8	22
11210.2	18
11210.5	23
11210.8	17
11211.1	18
11211.5	17
11211.8	20
11212.1	22
11212.4	21
11212.7	22
11213.1	23
11213.4	23
11213.7	23
11214	16
11214.4	18
11214.7	26
11215	19
11215.3	14
11215.7	16
11216	13
11216.3	18
11216.6	12
11216.9	21
11217.3	21
11217.6	18
11217.9	22
11218.2	18
11218.6	21
11218.9	17
11219.2	19
11219.5	14
11219.9	21
11220.2	19
11220.5	20
11220.8	17
11221.1	14
11221.5	15
11221.8	15
11222.1	19
11222.4	15
11222.8	15
11223.1	19
11223.4	13
11223.7	22
11224.1	18
11224.4	26
11224.7	25
11225	22
11225.3	23
11225.7	23
11226	22
11226.3	19
11226.6	22
11227	26
11227.3	31
11227.6	29
11227.9	29
11228.3	36
11228.6	37
11228.9	30
11229.2	28
11229.6	25
11229.9	24
11230.2	29
11230.5	23
11230.8	27
11231.2	26
11231.5	24
11231.8	27
11232.1	19
11232.5	24
11232.8	26
11233.1	27
11233.4	31
11233.8	32
11234.1	33
11234.4	38
11234.7	31
11235.1	34
11235.4	36
11235.7	42
11236	38
11236.3	35
11236.7	29
11237	29
11237.3	25
11237.6	29
11238	35
11238.3	25
11238.6	35
11238.9	37
11239.3	31
11239.6	25
11239.9	36
11240.2	29
11240.6	25
11240.9	28
11241.2	27
11241.5	25
11241.8	33
11242.2	34
11242.5	34
11242.8	30
11243.1	34
11243.5	36
11243.8	40
11244.1	35
11244.4	40
11244.8	34
11245.1	37
11245.4	38
11245.7	35
11246.1	40
11246.4	46
11246.7	41
11247	48
11247.3	43
11247.7	47
11248	51
11248.3	55
11248.6	51
11249	50
11249.3	46
11249.6	45
11249.9	43
11250.3	37
11250.6	46
11250.9	36
11251.2	48
11251.6	52
11251.9	50
11252.2	55
11252.5	50
11252.8	56
11253.2	49
11253.5	47
11253.8	57
11254.1	53
11254.5	56
11254.8	57
11255.1	70
11255.4	72
11255.8	68
11256.1	67
11256.4	77
11256.7	70
11257.1	67
11257.4	59
11257.7	63
11258	61
11258.4	55
11258.7	56
11259	52
11259.3	53
11259.6	63
11260	58
11260.3	63
11260.6	60
11260.9	62
11261.3	60
11261.6	56
11261.9	57
11262.2	58
11262.6	50
11262.9	45
11263.2	56
11263.5	64
11263.9	72
11264.2	72
11264.5	75
11264.8	77
11265.2	81
11265.5	83
11265.8	73
11266.1	80
11266.5	86
11266.8	77
11267.1	77
11267.4	82
11267.7	83
11268.1	86
11268.4	86
11268.7	82
11269	106
11269.4	97
11269.7	109
11270	117
11270.3	130
11270.7	135
11271	155
11271.3	142
11271.6	167
11272	159
11272.3	183
11272.6	177
11272.9	186
11273.3	228
11273.6	206
11273.9	206
11274.2	224
11274.6	223
11274.9	256
11275.2	276
11275.5	282
11275.8	303
11276.2	335
11276.5	354
11276.8	386
11277.1	392
11277.5	419
11277.8	450
11278.1	456
11278.4	475
11278.8	501
11279.1	526
11279.4	548
11279.7	594
11280.1	611
11280.4	641
11280.7	648
11281	659
11281.4	665
11281.7	655
11282	672
11282.3	677
11282.7	689
11283	677
11283.3	669
11283.6	671
11284	652
11284.3	660
11284.6	651
11284.9	652
11285.2	627
11285.6	625
11285.9	601
11286.2	586
11286.5	546
11286.9	560
11287.2	549
11287.5	528
11287.8	497
11288.2	485
11288.5	483
11288.8	455
11289.1	449
11289.5	438
11289.8	435
11290.1	418
11290.4	426
11290.8	416
11291.1	404
11291.4	413
11291.7	403
11292.1	398
11292.4	388
11292.7	401
11293	408
11293.4	409
11293.7	436
11294	442
11294.3	448
11294.7	454
11295	485
11295.3	466
11295.6	462
11295.9	478
11296.3	481
11296.6	495
11296.9	514
11297.2	525
11297.6	536
11297.9	547
11298.2	572
11298.5	563
11298.9	599
11299.2	612
11299.5	611
11299.8	619
11300.2	621
11300.5	631
11300.8	642
11301.1	631
11301.5	637
11301.8	612
11302.1	615
11302.4	610
11302.8	625
11303.1	637
11303.4	640
11303.7	636
11304.1	634
11304.4	620
11304.7	607
11305	608
11305.4	606
11305.7	587
11306	562
11306.3	551
11306.7	588
11307	586
11307.3	577
11307.6	610
11308	598
11308.3	610
11308.6	604
11308.9	622
11309.3	654
11309.6	695
11309.9	715
11310.2	729
11310.5	766
11310.9	799
11311.2	831
11311.5	885
11311.8	912
11312.2	925
11312.5	943
11312.8	989
11313.1	1010
11313.5	1036
11313.8	1033
11314.1	1047
11314.4	1056
11314.8	1053
11315.1	1049
11315.4	1050
11315.7	1018
11316.1	1019
11316.4	994
11316.7	983
11317	948
11317.4	924
11317.7	916
11318	901
11318.3	892
11318.7	876
11319	835
11319.3	826
11319.6	814
11320	797
11320.3	778
11320.6	780
11320.9	752
11321.3	745
11321.6	747
11321.9	729
11322.2	741
11322.6	735
11322.9	754
11323.2	776
11323.5	775
11323.9	783
11324.2	812
11324.5	822
11324.8	837
11325.2	860
11325.5	887
11325.8	932
11326.1	993
11326.5	1027
11326.8	1067
11327.1	1104
11327.4	1119
11327.8	1171
11328.1	1215
11328.4	1216
11328.7	1277
11329.1	1287
11329.4	1300
11329.7	1333
11330	1334
11330.4	1332
11330.7	1353
11331	1345
11331.3	1342
11331.7	1327
11332	1331
11332.3	1313
11332.6	1294
11333	1254
11333.3	1233
11333.6	1228
11333.9	1172
11334.3	1165
11334.6	1123
11334.9	1108
11335.2	1105
11335.6	1100
11335.9	1098
11336.2	1069
11336.5	1073
11336.9	1096
11337.2	1107
11337.5	1151
11337.8	1235
11338.2	1302
11338.5	1439
11338.8	1587
11339.1	1769
11339.5	2002
11339.8	2266
11340.1	2598
11340.4	3022
11340.8	3481
11341.1	3999
11341.4	4608
11341.7	5274
11342.1	5983
11342.4	6740
11342.7	7560
11343	8340
11343.4	9175
11343.7	10001
11344	10794
11344.3	11566
11344.7	12274
11345	12935
11345.3	13543
11345.6	14105
11346	14551
11346.3	14888
11346.6	15223
11346.9	15428
11347.3	15563
11347.6	15597
11347.9	15527
11348.2	15375
11348.6	15182
11348.9	14897
11349.2	14523
11349.5	14153
11349.9	13749
11350.2	13254
11350.5	12754
11350.8	12223
11351.2	11705
11351.5	11132
11351.8	10608
11352.1	10105
11352.5	9582
11352.8	9118
11353.1	8648
11353.4	8175
11353.8	7733
11354.1	7320
11354.4	6942
11354.7	6645
11355.1	6347
11355.4	6063
11355.7	5859
11356	5603
11356.4	5432
11356.7	5269
11357	5133
11357.3	5019
11357.7	4972
11358	4910
11358.3	4922
11358.6	4955
11359	5003
11359.3	5086
11359.6	5169
11359.9	5247
11360.3	5340
11360.6	5411
11360.9	5494
11361.2	5585
11361.6	5672
11361.9	5685
11362.2	5724
11362.5	5725
11362.9	5707
11363.2	5699
11363.5	5646
11363.8	5568
11364.2	5526
11364.5	5436
11364.8	5316
11365.1	5188
11365.5	5043
11365.8	4867
11366.1	4700
11366.4	4540
11366.8	4360
11367.1	4201
11367.4	4071
11367.7	3874
11368.1	3689
11368.4	3526
11368.7	3350
11369	3189
11369.4	3057
11369.7	2901
11370	2742
11370.3	2618
11370.7	2480
11371	2361
11371.3	2248
11371.6	2116
11372	2034
11372.3	1943
11372.6	1845
11373	1778
11373.3	1715
11373.6	1665
11373.9	1622
11374.3	1558
11374.6	1524
11374.9	1472
11375.2	1437
11375.6	1391
11375.9	1349
11376.2	1346
11376.5	1325
11376.9	1285
11377.2	1254
11377.5	1232
11377.8	1234
11378.2	1231
11378.5	1193
11378.8	1174
11379.1	1120
11379.5	1111
11379.8	1091
11380.1	1073
11380.4	1071
11380.8	1046
11381.1	1039
11381.4	1015
11381.7	981
11382.1	957
11382.4	957
11382.7	913
11383	880
11383.4	848
11383.7	825
11384	798
11384.3	775
11384.7	740
11385	731
11385.3	710
11385.6	703
11386	682
11386.3	671
11386.6	639
11387	645
11387.3	640
11387.6	649
11387.9	640
11388.3	621
11388.6	664
11388.9	668
11389.2	685
11389.6	707
11389.9	760
11390.2	811
11390.5	850
11390.9	906
11391.2	949
11391.5	1002
11391.8	1054
11392.2	1139
11392.5	1215
11392.8	1259
11393.1	1315
11393.5	1363
11393.8	1409
11394.1	1463
11394.4	1497
11394.8	1521
11395.1	1543
11395.4	1538
11395.7	1545
11396.1	1551
11396.4	1537
11396.7	1522
11397	1520
11397.4	1482
11397.7	1455
11398	1427
11398.4	1375
11398.7	1308
11399	1283
11399.3	1252
11399.7	1201
11400	1146
11400.3	1091
11400.6	1037
11401	1010
11401.3	976
11401.6	904
11401.9	870
11402.3	824
11402.6	793
11402.9	750
11403.2	731
11403.6	688
11403.9	689
11404.2	630
11404.5	628
11404.9	597
11405.2	571
11405.5	570
11405.8	541
11406.2	522
11406.5	501
11406.8	484
11407.2	480
11407.5	466
11407.8	433
11408.1	438
11408.5	420
11408.8	400
11409.1	401
11409.4	381
11409.8	380
11410.1	370
11410.4	365
11410.7	369
11411.1	350
11411.4	355
11411.7	352
11412	358
11412.4	336
11412.7	341
11413	358
11413.3	353
11413.7	355
11414	348
11414.3	340
11414.6	326
11415	354
11415.3	338
11415.6	344
11416	331
11416.3	332
11416.6	312
11416.9	317
11417.3	318
11417.6	318
11417.9	327
11418.2	311
11418.6	308
11418.9	309
11419.2	281
11419.5	288
11419.9	271
11420.2	264
11420.5	257
11420.8	245
11421.2	230
11421.5	226
11421.8	233
11422.1	235
11422.5	228
11422.8	221
11423.1	233
11423.5	252
11423.8	259
11424.1	276
11424.4	259
11424.8	253
11425.1	269
11425.4	257
11425.7	284
11426.1	279
11426.4	275
11426.7	264
11427	267
11427.4	273
11427.7	264
11428	268
11428.3	267
11428.7	262
11429	252
11429.3	255
11429.7	237
11430	239
11430.3	231
11430.6	230
11431	221
11431.3	224
11431.6	214
11431.9	206
11432.3	202
11432.6	228
11432.9	214
11433.2	187
11433.6	200
11433.9	196
11434.2	191
11434.5	202
11434.9	189
11435.2	180
11435.5	178
11435.9	168
11436.2	173
11436.5	166
11436.8	166
11437.2	167
11437.5	155
11437.8	149
11438.1	167
11438.5	174
11438.8	171
11439.1	176
11439.4	150
11439.8	164
11440.1	165
11440.4	164
11440.7	157
11441.1	174
11441.4	171
11441.7	181
11442.1	183
11442.4	180
11442.7	191
11443	189
11443.4	198
11443.7	182
11444	190
11444.3	196
11444.7	182
11445	180
11445.3	180
11445.6	185
11446	183
11446.3	187
11446.6	189
11447	198
11447.3	197
11447.6	189
11447.9	181
11448.3	189
11448.6	191
11448.9	197
11449.2	199
11449.6	195
11449.9	194
11450.2	195
11450.5	202
11450.9	213
11451.2	205
11451.5	205
11451.9	208
11452.2	204
11452.5	204
11452.8	198
11453.2	195
11453.5	206
11453.8	199
11454.1	199
11454.5	198
11454.8	193
11455.1	209
11455.4	209
11455.8	208
11456.1	200
11456.4	194
11456.7	218
11457.1	222
11457.4	215
11457.7	228
11458.1	242
11458.4	237
11458.7	241
11459	249
11459.4	259
11459.7	287
11460	287
11460.3	294
11460.7	301
11461	296
11461.3	273
11461.6	279
11462	285
11462.3	271
11462.6	263
11463	248
11463.3	258
11463.6	273
11463.9	255
11464.3	240
11464.6	242
11464.9	249
11465.2	236
11465.6	249
11465.9	227
11466.2	230
11466.6	213
11466.9	204
11467.2	197
11467.5	179
11467.9	176
11468.2	188
11468.5	182
11468.8	179
11469.2	171
11469.5	169
11469.8	166
11470.1	170
11470.5	162
11470.8	166
11471.1	171
11471.5	156
11471.8	160
11472.1	178
11472.4	168
11472.8	165
11473.1	172
11473.4	167
11473.7	188
11474.1	170
11474.4	182
11474.7	165
11475	177
11475.4	168
11475.7	160
11476	171
11476.4	168
11476.7	168
11477	179
11477.3	172
11477.7	167
11478	176
11478.3	172
11478.6	167
11479	172
11479.3	184
11479.6	175
11480	183
11480.3	163
11480.6	160
11480.9	179
11481.3	164
11481.6	166
11481.9	174
11482.2	169
11482.6	176
11482.9	170
11483.2	147
11483.6	170
11483.9	165
11484.2	155
11484.5	167
11484.9	160
11485.2	152
11485.5	160
11485.8	170
11486.2	171
11486.5	168
11486.8	182
11487.1	182
11487.5	189
11487.8	205
11488.1	208
11488.5	203
11488.8	209
11489.1	198
11489.4	192
11489.8	192
11490.1	190
11490.4	204
11490.7	186
11491.1	199
11491.4	183
11491.7	191
11492.1	181
11492.4	192
11492.7	197
11493	188
11493.4	190
11493.7	193
11494	185
11494.3	163
11494.7	172
11495	169
11495.3	181
11495.7	181
11496	178
11496.3	166
11496.6	183
11497	186
11497.3	173
11497.6	158
11497.9	192
11498.3	162
11498.6	168
11498.9	159
11499.3	172
11499.6	166
11499.9	175

## Sheet: Fig.2I
		Intensity (AU)
		no protein	StYeeD(WT)	BSA	StYeeD(C17A)	StYeeD(V39A)	StYeeD(Y43A)	StYeeD(L45A)	StYeeD(E48A)	StYeeD(R49A)	StYeeD(E63A)		Note
	n1	0.212	0.294	0.212333	0.226333	0.287667	0.348667	0.321	0.322333	0.350667	0.288667		Mean values were calculated from three independet measurements.
	n2	0.256	0.311	0.237	0.219667	0.307	0.366333	0.362333	0.319	0.350667	0.316		Error bars represent standard deviations.
	n3	0.204	0.282	0.205333	0.233	0.299667	0.353	0.342	0.341333	0.359	0.310667

[truncated: 8 more sheets: Fig.4A, Fig.4B, Fig.S2B, Fig.S2C, Fig.S2G, Fig.S4A, Fig.S4B, Fig.S4C]
